# Supplementary material for: Causes and risk factors of death among people who inject drugs in Indonesia, Ukraine and Vietnam: findings from HPTN 074 randomized trial
Source: PubMed Central journal article supplement (PMC10173611; doi:10.1186/s12879-023-08201-3), 2023-05-11
Supplement: 12879_2023_8201_MOESM1_ESM.pdf [file 12879_2023_8201_MOESM1_ESM.pdf]

## HPTN 074 Index participants dataset codebook

| <b>Variable Names</b> | <b>Format</b>                                                                   | <b>Description</b>                                                                                                                                            |
|-----------------------|---------------------------------------------------------------------------------|---------------------------------------------------------------------------------------------------------------------------------------------------------------|
| uid                   |                                                                                 | Participant uid                                                                                                                                               |
| age                   |                                                                                 | Participant age at enrollment                                                                                                                                 |
| sitedfno              | 250="Indonesia"<br>251="Ukraine"<br>252="Vietnam"                               | Study site                                                                                                                                                    |
| gend                  | 1="Female"<br>2="Male"                                                          | Participant gender                                                                                                                                            |
| arm                   | 1= "SOC"<br>2= "Intervention"                                                   | Study arm                                                                                                                                                     |
| deceased              | 1= "Death"<br>0= "Alive"                                                        | Mortality status at study close                                                                                                                               |
| personyrs             |                                                                                 | Number of years between enrollment and death (for those who died), and between enrollment and the last visit (for those who were still alive at study close). |
| dthrsn_i              | 1="AIDS related"<br>2="Non-AIDS medical"<br>3="Drug related"<br>4="Other cause" | Cause of death                                                                                                                                                |
| vst_wk                |                                                                                 | Visit week                                                                                                                                                    |
| auditc                | 0="Non Hazardous alcohol use"<br>1="Hazardous alcohol use"                      | Alcohol use in the past 3 months                                                                                                                              |
| dg_opd                | 0="No"<br>1="Yes"                                                               | Injected opioids in the past 3 months                                                                                                                         |
| dg_stml               | 0="No"<br>1="Yes"                                                               | Injected stimulants in the past 3 months                                                                                                                      |
| dg_oth                | 0="No"<br>1="Yes"                                                               | Injected other drugs in the past 3 months                                                                                                                     |
| dg_na                 | 0="No"<br>1="Yes"                                                               | Injected no drugs in the past 3 months                                                                                                                        |
| dg_poly               | 0="No"<br>1="Yes"                                                               | Injected multiple drugs ("Polydrug use") in the past 3 months                                                                                                 |
| injd                  |                                                                                 | Number of days of injecting drugs use in the past month                                                                                                       |
| dg_opd_nj             | 0="No"<br>1="Yes"                                                               | Non-injected opioid drug use in the past 3 months                                                                                                             |
| dg_stml_nj            | 0="No"<br>1="Yes"                                                               | Non-injected stimulant drug use in the past 3 months                                                                                                          |
| dg_oth_nj             | 0="No"<br>1="Yes"                                                               | Other non-injected drug use in the past 3 months                                                                                                              |
| dg_na_nj              | 0="No"                                                                          | No non-injected drug use in the past 3 months                                                                                                                 |

|            |                                                              |                                                                           |
|------------|--------------------------------------------------------------|---------------------------------------------------------------------------|
|            | 1="Yes"                                                      |                                                                           |
| dg_poly_nj | 0="No"<br>1="Yes"                                            | Used multiple non-injected drugs ("Polydrug use")<br>in the past 3 months |
| artstatt   | 1="ART naive"<br>2="previously on ART"<br>3="current on ART" | ART status                                                                |
| phq9_2cat  | 0="no/mild depression"<br>1="moderate/severe"                | Depression status according to PHQ9 scale                                 |
| int_yes    | 0="No"<br>1="Yes"                                            | Internalized stigma                                                       |
| exp_yes    | 0="No"<br>1="Yes"                                            | Experienced stigma                                                        |
| ant_yes    | 0="No"<br>1="Yes"                                            | Anticipated stigma                                                        |
| total_yes  | 0="No"<br>1="Yes"                                            | Total stigma                                                              |
| matstcatt  | 1="ever used"<br>2="MAT naive"                               | MAT status                                                                |
| vl_40      | 0="non VL suppression"<br>1="VL suppression"                 | Viral suppression (viral load<40)                                         |
| cd4_200    | 0="<200 cells/mm3"<br>1=">=200 cells/mm3"                    | CD4 count                                                                 |

## HPTN 074 Partner participants dataset codebook

| <b>Variable Names</b> | <b>Format</b>                                              | <b>Description</b>                                                                                                                                            |
|-----------------------|------------------------------------------------------------|---------------------------------------------------------------------------------------------------------------------------------------------------------------|
| uid                   |                                                            | Participant uid                                                                                                                                               |
| age                   |                                                            | Participant age at enrollment                                                                                                                                 |
| sitedfno              | 250="Indonesia"<br>251="Ukraine"<br>252="Vietnam"          | Study site                                                                                                                                                    |
| gend                  | 1="Female"<br>2="Male"                                     | Participant gender                                                                                                                                            |
| deceased              | 1= "Death"<br>0= "Alive"                                   | Mortality status at study close                                                                                                                               |
| personyrs             |                                                            | Number of years between enrollment and death (for those who died), and between enrollment and the last visit (for those who were still alive at study close). |
| dthrsn_p              | 1="Medical"<br>2="Drug-related"<br>3="Other cause"         | Cause of death                                                                                                                                                |
| arm                   | 0= "SOC"<br>1= "Intervention"                              | Study arm                                                                                                                                                     |
| vst_wk                |                                                            | Visit week                                                                                                                                                    |
| auditc                | 0="Non Hazardous alcohol use"<br>1="Hazardous alcohol use" | Alcohol use in the past 3 months                                                                                                                              |
| dg_opd                | 0="No"<br>1="Yes"                                          | Injected opioids in the past 3 months                                                                                                                         |
| dg_stml               | 0="No"<br>1="Yes"                                          | Injected stimulants in the past 3 months                                                                                                                      |
| dg_oth                | 0="No"<br>1="Yes"                                          | Injected other drugs in the past 3 months                                                                                                                     |
| dg_na                 | 0="No"<br>1="Yes"                                          | Injected no drugs in the past 3 months                                                                                                                        |
| dg_poly               | 0="No"<br>1="Yes"                                          | Injected multiple drugs ("Polydrug use") in the past 3 months                                                                                                 |
| injd                  |                                                            | Number of days of injecting drugs use in the past month                                                                                                       |
| dg_opd_nj             | 0="No"<br>1="Yes"                                          | Non-injected opioid drug use in the past 3 months                                                                                                             |
| dg_stml_nj            | 0="No"<br>1="Yes"                                          | Non-injected stimulant drug use in the past 3 months                                                                                                          |
| dg_oth_nj             | 0="No"<br>1="Yes"                                          | Other non-injected drug use in the past 3 months                                                                                                              |
| dg_na_nj              | 0="No"<br>1="Yes"                                          | No non-injected drug use in the past 3 months                                                                                                                 |
| dg_poly_nj            | 0="No"<br>1="Yes"                                          | Used multiple non-injected drugs ("Polydrug use") in the past 3 months                                                                                        |

|          |                                |            |
|----------|--------------------------------|------------|
| matstcat | 1="ever used"<br>2="MAT naive" | MAT status |
|----------|--------------------------------|------------|

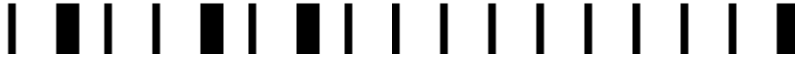

(HPTN 074) DF/Net 074

(DEM-1) 001

Participant ID:

|                    |  |  |                       |  |  |  |            |  |               |  |  |  |  |
|--------------------|--|--|-----------------------|--|--|--|------------|--|---------------|--|--|--|--|
|                    |  |  |                       |  |  |  |            |  |               |  |  |  |  |
| <i>Site Number</i> |  |  | <i>Network Number</i> |  |  |  | <i>Chk</i> |  | <i>Cohort</i> |  |  |  |  |

Form Completion Date:

|           |  |            |  |  |           |  |
|-----------|--|------------|--|--|-----------|--|
|           |  |            |  |  |           |  |
| <i>dd</i> |  | <i>MMM</i> |  |  | <i>yy</i> |  |

**Demographics**

*Thank you for being a part of our research. People live in different places, with different customs, cultures, sexual practices and beliefs. We hope to include people from different communities in our research. We respect all people, regardless of their differences. Not all questions we ask in our research will apply to you. Because we do not want to make assumptions, we ask the same questions of everyone. We want you to be comfortable in speaking with us. You do not have to answer any question that makes you uncomfortable.*

*Now I am going to ask you some questions about yourself. The answer to these questions will tell us more about who you are, such as your age and ethnicity (what cultural group you come from). I will also ask you about your sex and gender. Please feel free to ask any questions about things that you don't understand.*

|           |                                                                 |                                                                                                                                                                                                                                                                                                                                                                                                                                                                                                                                                                             |  |           |  |  |  |  |           |  |            |  |           |  |           |                                                                                                                                                                                                                                                                |  |  |
|-----------|-----------------------------------------------------------------|-----------------------------------------------------------------------------------------------------------------------------------------------------------------------------------------------------------------------------------------------------------------------------------------------------------------------------------------------------------------------------------------------------------------------------------------------------------------------------------------------------------------------------------------------------------------------------|--|-----------|--|--|--|--|-----------|--|------------|--|-----------|--|-----------|----------------------------------------------------------------------------------------------------------------------------------------------------------------------------------------------------------------------------------------------------------------|--|--|
| <b>1</b>  | What is your date of birth?                                     | <table border="1" style="display: inline-table; border-collapse: collapse;"> <tr> <td style="width: 30px; height: 20px;"></td> </tr> <tr> <td colspan="2" style="text-align: center;"><i>dd</i></td> <td colspan="2" style="text-align: center;"><i>MMM</i></td> <td colspan="2" style="text-align: center;"><i>yy</i></td> </tr> </table> |  |           |  |  |  |  | <i>dd</i> |  | <i>MMM</i> |  | <i>yy</i> |  | <b>OR</b> | <i>If unknown, record age:</i> <table border="1" style="display: inline-table; border-collapse: collapse; vertical-align: middle;"> <tr> <td style="width: 30px; height: 20px;"></td> <td style="width: 30px; height: 20px;"></td> </tr> </table> <i>years</i> |  |  |
|           |                                                                 |                                                                                                                                                                                                                                                                                                                                                                                                                                                                                                                                                                             |  |           |  |  |  |  |           |  |            |  |           |  |           |                                                                                                                                                                                                                                                                |  |  |
| <i>dd</i> |                                                                 | <i>MMM</i>                                                                                                                                                                                                                                                                                                                                                                                                                                                                                                                                                                  |  | <i>yy</i> |  |  |  |  |           |  |            |  |           |  |           |                                                                                                                                                                                                                                                                |  |  |
|           |                                                                 |                                                                                                                                                                                                                                                                                                                                                                                                                                                                                                                                                                             |  |           |  |  |  |  |           |  |            |  |           |  |           |                                                                                                                                                                                                                                                                |  |  |
| <b>2</b>  | What is your sex at birth?                                      | <input type="checkbox"/> <i>Male</i><br><input type="checkbox"/> <i>Female</i>                                                                                                                                                                                                                                                                                                                                                                                                                                                                                              |  |           |  |  |  |  |           |  |            |  |           |  |           |                                                                                                                                                                                                                                                                |  |  |
| <b>3</b>  | How do you identify your gender?<br><i>Mark all that apply.</i> | <input type="checkbox"/> <i>Male</i><br><input type="checkbox"/> <i>Female</i><br><input type="checkbox"/> <i>Other, specify:</i><br><br><i>Local language:</i> _____<br><br><i>English:</i> _____                                                                                                                                                                                                                                                                                                                                                                          |  |           |  |  |  |  |           |  |            |  |           |  |           |                                                                                                                                                                                                                                                                |  |  |
| <b>4</b>  | Are you currently a student?                                    | <input type="checkbox"/> <i>Yes</i><br><input type="checkbox"/> <i>No</i>                                                                                                                                                                                                                                                                                                                                                                                                                                                                                                   |  |           |  |  |  |  |           |  |            |  |           |  |           |                                                                                                                                                                                                                                                                |  |  |

This interviewer-administered form is used to collect participants' demographic information.

This form is completed for all participants who were assigned a Participant ID during screening. Submit this CRF with **Screening Outcome** form for those participants who do not enroll. Submit after the enrollment visit only for those participants who enroll.

**Item-specific Instructions:**

|               |                                                                                                                                                                                                                    |
|---------------|--------------------------------------------------------------------------------------------------------------------------------------------------------------------------------------------------------------------|
| <b>Item 1</b> | If any portion of the date of birth is unknown, record age at time of enrollment. If age is unknown, record participant's estimate of their age. Do not complete both answers.                                     |
| <b>Item 3</b> | This item must be self-reported by the participant. Site staff is encouraged to document in chart notes if the participant, during study participation, prefers to be referred to by a specific pronoun or gender. |

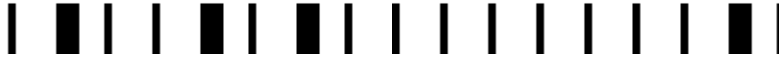

(HPTN 074) DF/Net 074

(DEM-2) 002

Participant ID:

|                      |                      |                      |                      |                      |                      |                      |                      |                      |                      |                      |                      |                      |                      |                      |                      |                      |                      |                      |                      |
|----------------------|----------------------|----------------------|----------------------|----------------------|----------------------|----------------------|----------------------|----------------------|----------------------|----------------------|----------------------|----------------------|----------------------|----------------------|----------------------|----------------------|----------------------|----------------------|----------------------|
| <input type="text"/> | <input type="text"/> | <input type="text"/> | <input type="text"/> | <input type="text"/> | <input type="text"/> | <input type="text"/> | <input type="text"/> | <input type="text"/> | <input type="text"/> | <input type="text"/> | <input type="text"/> | <input type="text"/> | <input type="text"/> | <input type="text"/> | <input type="text"/> | <input type="text"/> | <input type="text"/> | <input type="text"/> | <input type="text"/> |
| Site Number          |                      |                      | Network Number       |                      |                      |                      |                      | Chk                  | Cohort               |                      |                      |                      |                      |                      |                      |                      |                      |                      |                      |

**Demographics**

**5** What is the highest level of education you have completed?

- No schooling*
- Primary school, not complete*
- Primary school, complete*
- Secondary school, not complete*
- Secondary school, complete*
- Technical training, not complete*
- Technical training, complete*
- College or university, not complete*
- College or university, complete*

**6** What is your relationship status? Are you:

- Married*
- Living with a sexual partner but not married*
- Separated*
- Divorced*
- Widowed*
- Single*
- Refuse to answer*

**7** Have you been homeless at any time in the last 6 months?

- Yes*
- No*

This interviewer-administered form is used to collect participants' demographic information.

This form is completed for all participants who were assigned a Participant ID during screening. Submit this CRF with **Screening Outcome** form for those participants who do not enroll. Submit after the enrollment visit only for those participants who enroll.



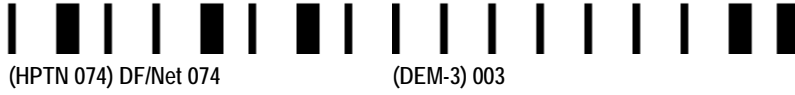

Participant ID:

|             |  |  |                |  |  |  |     |  |        |  |  |  |  |  |  |  |  |  |  |
|-------------|--|--|----------------|--|--|--|-----|--|--------|--|--|--|--|--|--|--|--|--|--|
|             |  |  |                |  |  |  |     |  |        |  |  |  |  |  |  |  |  |  |  |
| Site Number |  |  | Network Number |  |  |  | Chk |  | Cohort |  |  |  |  |  |  |  |  |  |  |

**Demographics**

**8** How would you describe your current living situation? *Mark all that apply.*

- 8a. Live in a house that I own or rent
- 8b. Live in parent's home
- 8c. Live in other relative's home (e.g. sibling, cousin, aunt and/or uncle)
- 8d. Rent a room or space in someone else's house or apartment
- 8e. Stay with someone else for free (don't pay regular room and board)
- 8f. Live on the street, in a park, alley or abandoned building
- 8g. Live in a homeless shelter
- 8h. Stay at more than two different places a week
- 8i. Live in a drug recovery or any transitional house
- 8j. Refuse to answer
- 8k. Other place, specify:

Local language: \_\_\_\_\_

English: \_\_\_\_\_

**9** Who lives with you? *Mark all that apply.*

- 9a. Spouse/partner/girl-boyfriend
- 9b. Own children
- 9c. Parents
- 9d. Other family members
- 9e. Friends
- 9f. Others (e.g., roommates, tenants)
- 9g. Live alone
- 9h. Refuse to answer

This interviewer-administered form is used to collect participants' demographic information.

This form is completed for all participants who were assigned a Participant ID during screening. Submit this CRF with **Screening Outcome** form for those participants who do not enroll. Submit after the enrollment visit only for those participants who enroll.

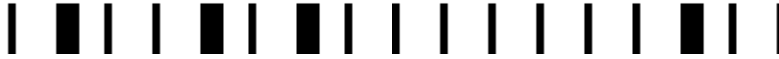

(HPTN 074) DF/Net 074

(DEM-4) 004

Participant ID:

|                    |  |  |                       |  |  |  |            |  |               |  |  |  |  |  |  |  |  |  |  |
|--------------------|--|--|-----------------------|--|--|--|------------|--|---------------|--|--|--|--|--|--|--|--|--|--|
|                    |  |  |                       |  |  |  |            |  |               |  |  |  |  |  |  |  |  |  |  |
| <i>Site Number</i> |  |  | <i>Network Number</i> |  |  |  | <i>Chk</i> |  | <i>Cohort</i> |  |  |  |  |  |  |  |  |  |  |

Demographics

10 At any time during the past 3 months, have you been unemployed?

- Yes*
- No*
- Refuse to answer*

11 Which of the following best describes your current employment status? Are you:

- Employed full-time*
- Employed part-time*
- Unemployed but seeking work*
- Unemployed—not seeking work*
- Retired*
- Refuse to answer*

12 In the past month, how many days have you been working for pay?   # days

This interviewer-administered form is used to collect participants' demographic information.

This form is completed for all participants who were assigned a Participant ID during screening. Submit this CRF with **Screening Outcome** form for those participants who do not enroll. Submit after the enrollment visit only for those participants who enroll.

**Item-specific Instructions:**

|                    |                                                                                                                                                                                       |
|--------------------|---------------------------------------------------------------------------------------------------------------------------------------------------------------------------------------|
| <b>Items 11-12</b> | Employment is self-defined by the participant. Document any activity for which the participant is receiving payment for doing work, whether or not it is considered legal employment. |
|--------------------|---------------------------------------------------------------------------------------------------------------------------------------------------------------------------------------|

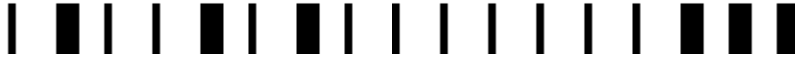

(HPTN 074) DF/Net 074

(DVI) 007

Participant ID:

|                    |  |  |                       |  |  |  |            |  |               |  |  |  |  |
|--------------------|--|--|-----------------------|--|--|--|------------|--|---------------|--|--|--|--|
|                    |  |  |                       |  |  |  |            |  |               |  |  |  |  |
| <i>Site Number</i> |  |  | <i>Network Number</i> |  |  |  | <i>Chk</i> |  | <i>Cohort</i> |  |  |  |  |

Form Completion Date:

|           |  |            |  |           |  |
|-----------|--|------------|--|-----------|--|
|           |  |            |  |           |  |
| <i>dd</i> |  | <i>MMM</i> |  | <i>yy</i> |  |

### Demographics - Vietnam

1 What does the participant report as his/her ethnicity/nationality? *Mark all that apply.*

- 1a. Kinh
- 1b. Tay
- 1c. Nung
- 1d. San diu
- 1e. H'Mong
- 1f. San chi (Trail)
- 1g. Hoa
- 1h. Dao (Man)
- 1i. Cao Lan
- 1j. Ngai
- 1k. Thai
- 1l. Other, specify:

Local language: \_\_\_\_\_

English: \_\_\_\_\_

*No instructions necessary.*

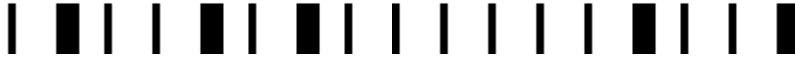

(HPTN 074) DF/Net 074

(DIN) 009

Participant ID:

|                    |  |  |                       |  |  |  |            |               |  |  |  |
|--------------------|--|--|-----------------------|--|--|--|------------|---------------|--|--|--|
|                    |  |  |                       |  |  |  |            |               |  |  |  |
| <i>Site Number</i> |  |  | <i>Network Number</i> |  |  |  | <i>Chk</i> | <i>Cohort</i> |  |  |  |

Form Completion Date:

|           |  |            |  |           |  |
|-----------|--|------------|--|-----------|--|
|           |  |            |  |           |  |
| <i>dd</i> |  | <i>MMM</i> |  | <i>yy</i> |  |

### Demographics - Indonesia

1 What does the participant report as his/her ethnicity/nationality? *Mark all that apply.*

- 1a. *Betawi*
- 1b. *Jawa*
- 1c. *Sunda*
- 1d. *Minang*
- 1e. *Batak*
- 1f. *Bugis*
- 1g. *Ambon*
- 1h. *Tionghoa*
- 1i. *Other, specify:*

*Local language:* \_\_\_\_\_

*English:* \_\_\_\_\_

*No additional instructions needed.*



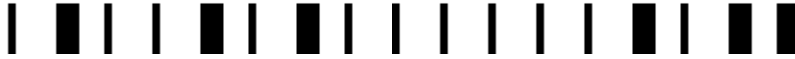

(HPTN 074) DF/Net 074

(DUK) 011

Participant ID:

|                    |  |  |                       |  |  |  |            |  |               |  |  |  |  |
|--------------------|--|--|-----------------------|--|--|--|------------|--|---------------|--|--|--|--|
|                    |  |  |                       |  |  |  |            |  |               |  |  |  |  |
| <i>Site Number</i> |  |  | <i>Network Number</i> |  |  |  | <i>Chk</i> |  | <i>Cohort</i> |  |  |  |  |

Form Completion Date:

|           |  |            |  |           |  |
|-----------|--|------------|--|-----------|--|
|           |  |            |  |           |  |
| <i>dd</i> |  | <i>MMM</i> |  | <i>yy</i> |  |

### Demographics - Ukraine

1 What does the participant report as his/her ethnicity/nationality? *Mark all that apply.*

1a. *Ukrainian*

1b. *Russian*

1c. *Other, specify:*

*Local language:* \_\_\_\_\_

*English:* \_\_\_\_\_

*No additional instructions needed.*

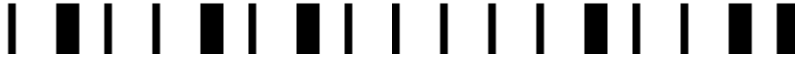

(HPTN 074) DF/Net 074

(IPT) 019

Participant ID:

|                    |  |  |                       |  |  |  |            |               |  |  |
|--------------------|--|--|-----------------------|--|--|--|------------|---------------|--|--|
|                    |  |  |                       |  |  |  |            |               |  |  |
| <i>Site Number</i> |  |  | <i>Network Number</i> |  |  |  | <i>Chk</i> | <i>Cohort</i> |  |  |

Screening Visit Date:

|           |  |            |  |           |  |
|-----------|--|------------|--|-----------|--|
|           |  |            |  |           |  |
| <i>dd</i> |  | <i>MMM</i> |  | <i>yy</i> |  |

**Index PTID Tracker**

**1** Was the participant's identity checked (e.g. fingerprint, unique identification card, etc.)?  Yes  No  
 If yes, go to item 2.

1a. If no, reason: \_\_\_\_\_

**2** Has this participant been seen before for HPTN 074?  Yes  No  
 If no, end of form.

2a. List all prior PTIDs associated with this participant:

|          | <i>Site Number</i> | <i>Network Number</i> | <i>Chk</i> | <i>Cohort</i> |          | <i>Site Number</i> | <i>Network Number</i> | <i>Chk</i> | <i>Cohort</i> |
|----------|--------------------|-----------------------|------------|---------------|----------|--------------------|-----------------------|------------|---------------|
| PTID #1: |                    |                       |            |               | PTID #4: |                    |                       |            |               |
| PTID #2: |                    |                       |            |               | PTID #5: |                    |                       |            |               |
| PTID #3: |                    |                       |            |               |          |                    |                       |            |               |

This form is completed for all participants who were assigned a participant ID during screening and is submitted for all screened participants.

**Item-specific Instructions:**

|                             |                                                                                                                                            |
|-----------------------------|--------------------------------------------------------------------------------------------------------------------------------------------|
| <b>Screening Visit Date</b> | The screening visit date is the date which the participant provided a screening blood sample for HIV testing. A complete date is required. |
|-----------------------------|--------------------------------------------------------------------------------------------------------------------------------------------|

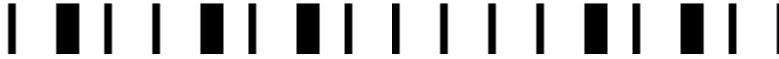

(HPTN 074) DF/Net 074

(ISO-1) 020

Participant ID:

|             |  |  |                |  |  |  |     |        |  |  |  |
|-------------|--|--|----------------|--|--|--|-----|--------|--|--|--|
|             |  |  |                |  |  |  |     |        |  |  |  |
| Site Number |  |  | Network Number |  |  |  | Chk | Cohort |  |  |  |

Screening Visit Date:

|    |  |     |  |    |  |
|----|--|-----|--|----|--|
|    |  |     |  |    |  |
| dd |  | MMM |  | yy |  |

**Index Screening Outcome**

**1** Did the participant agree to have samples of blood collected at screening stored and used for future testing related to HIV infection?

- Yes
- No

**2** How was this participant recruited? *Mark all that apply.*

- 2a. From another drug injector
- 2b. From an HPTN 074 participant
- 2c. From a drug user outside of their network
- 2d. Social media (e.g., Facebook) or other internet
- 2e. Print media
- 2f. TV or radio media
- 2g. Harm reduction sites/center
- 2h. Hot spots
- 2i. HIV clinics
- 2j. MAT clinics
- 2k. Drug sales locations
- 2l. Outreach
- 2m. Other, specify: \_\_\_\_\_

Local language: \_\_\_\_\_

English: \_\_\_\_\_

**3** Did the participant enroll in the study?

- Yes —▶ *If yes, end of form. Do not submit page 2.*
- No

The **Index Screening Outcome** CRF documents participant screening and collects information about recruitment and reasons why participants may not enroll in the study.

This form is completed for all participants who were assigned a participant ID during screening and is submitted for all screened participants.

**Item-specific Instructions:**

|                             |                                                                                                                                            |
|-----------------------------|--------------------------------------------------------------------------------------------------------------------------------------------|
| <b>Screening Visit Date</b> | The screening visit date is the date which the participant provided a screening blood sample for HIV testing. A complete date is required. |
| <b>Item 1</b>               | Document the participant's decision regarding screening specimen storage as documented on the screening consent form.                      |

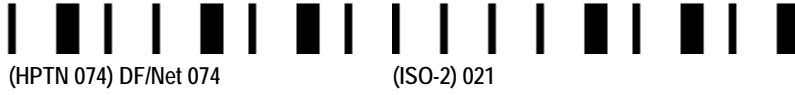

(HPTN 074) DF/Net 074

(ISO-2) 021

Participant ID:

|                    |  |  |                       |  |  |  |            |  |               |  |  |  |  |
|--------------------|--|--|-----------------------|--|--|--|------------|--|---------------|--|--|--|--|
|                    |  |  |                       |  |  |  |            |  |               |  |  |  |  |
| <i>Site Number</i> |  |  | <i>Network Number</i> |  |  |  | <i>Chk</i> |  | <i>Cohort</i> |  |  |  |  |

**Index Screening Outcome**

**4** Why was the participant not enrolled in the study? *Mark all that apply.*

- 4a. Current participation in an HIV prevention study or previous/current participation in an HIV vaccine study
- 4b. Serious and active medical or mental illness
- 4c. Previously screened as a potential network partner of another index participant in this study
- 4d. Currently or previously a partner of an index participant
- 4e. Unwilling to adhere to study procedures
- 4f. Withdrew consent/refused to participate
- 4g. Unable to recruit network partner within window after screening blood draw
- 4h. Viral load < 1,000 copies/mL
- 4i. Does not meet the criteria for active injection drug user per protocol
- 4j. Not HIV positive
- 4k. Does not report sharing needles/syringes or drug solutions at least once in the last month
- 4l. Did not complete screening procedures

4m. Other, specify: \_\_\_\_\_ Local language: \_\_\_\_\_  
 English: \_\_\_\_\_

The **Index Screening Outcome** CRF documents participant screening and collects information about recruitment and reasons why participants may not enroll in the study.

This form is completed for all participants who were assigned a participant ID during screening and is submitted for all screened participants.

**Item-specific Instructions:**

|                             |                                                                                                                                            |
|-----------------------------|--------------------------------------------------------------------------------------------------------------------------------------------|
| <b>Screening Visit Date</b> | The screening visit date is the date which the participant provided a screening blood sample for HIV testing. A complete date is required. |
|-----------------------------|--------------------------------------------------------------------------------------------------------------------------------------------|



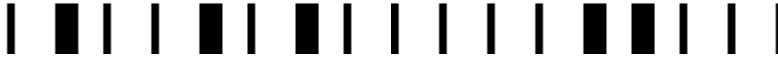

(HPTN 074) DF/Net 074

(PPT) 024

Participant ID:

|                    |  |  |                       |  |  |  |            |               |  |  |
|--------------------|--|--|-----------------------|--|--|--|------------|---------------|--|--|
|                    |  |  |                       |  |  |  |            |               |  |  |
| <i>Site Number</i> |  |  | <i>Network Number</i> |  |  |  | <i>Chk</i> | <i>Cohort</i> |  |  |

Screening Visit Date:

|           |  |            |  |  |           |
|-----------|--|------------|--|--|-----------|
|           |  |            |  |  |           |
| <i>dd</i> |  | <i>MMM</i> |  |  | <i>yy</i> |

**Partner PTID Tracker**

**1** Was the participant's identity checked (e.g. fingerprint, unique identification card, etc.)?  Yes  No  
 If yes, go to item 2.

1a. If no, reason: \_\_\_\_\_

**2** Has this participant been seen before for HPTN 074?  Yes  No  
 If no, end of form.

2a. List all prior PTIDs associated with this participant:

|          | <i>Site Number</i> | <i>Network Number</i> | <i>Chk</i> | <i>Cohort</i> |          | <i>Site Number</i> | <i>Network Number</i> | <i>Chk</i> | <i>Cohort</i> |
|----------|--------------------|-----------------------|------------|---------------|----------|--------------------|-----------------------|------------|---------------|
| PTID #1: |                    |                       |            |               | PTID #4: |                    |                       |            |               |
| PTID #2: |                    |                       |            |               | PTID #5: |                    |                       |            |               |
| PTID #3: |                    |                       |            |               |          |                    |                       |            |               |

This form is completed for all participants who were assigned a participant ID during screening and is submitted for all screened participants.

**Item-specific Instructions:**

|                             |                                                                                                                                            |
|-----------------------------|--------------------------------------------------------------------------------------------------------------------------------------------|
| <b>Screening Visit Date</b> | The screening visit date is the date which the participant provided a screening blood sample for HIV testing. A complete date is required. |
|-----------------------------|--------------------------------------------------------------------------------------------------------------------------------------------|

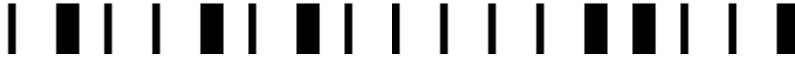

(HPTN 074) DF/Net 074

(PSO) 025

Participant ID:

|                    |  |  |                       |  |  |  |            |               |  |  |  |  |  |
|--------------------|--|--|-----------------------|--|--|--|------------|---------------|--|--|--|--|--|
|                    |  |  |                       |  |  |  |            |               |  |  |  |  |  |
| <i>Site Number</i> |  |  | <i>Network Number</i> |  |  |  | <i>Chk</i> | <i>Cohort</i> |  |  |  |  |  |

Screening Visit Date:

|           |  |            |  |  |           |  |
|-----------|--|------------|--|--|-----------|--|
|           |  |            |  |  |           |  |
| <i>dd</i> |  | <i>MMM</i> |  |  | <i>yy</i> |  |

**Partner Screening Outcome**

**1** Did the participant agree to have samples of blood collected at screening stored and used for future testing related to HIV infection?

- Yes
- No

**2** Did the participant enroll in the study?

- Yes → *If yes, end of form.*
- No

**3** Why was the participant not enrolled in the study? *Mark all that apply.*

- 3a. Any reactive or positive HIV rapid or HIV EIA test
- 3b. Current participation in an HIV prevention study or previous/current participation in an HIV vaccine study
- 3c. Serious and active medical or mental illness
- 3d. Previously screened as a potential network member of another index participant in this study
- 3e. Previously named and enrolled as a partner of another index partner
- 3f. Unwilling to adhere to study procedures
- 3g. Withdrew consent/refused to participate
- 3h. Does not meet the criteria for active injection drug user per protocol
- 3i. Could not confirm injection relationship with index
- 3j. Did not complete screening procedures
- 3k. Other, specify: \_\_\_\_\_

*Local language:* \_\_\_\_\_

*English:* \_\_\_\_\_

The **Partner Screening Outcome** CRF documents participant screening and reasons why participants may not enroll in the study.

This form is completed for all participants who were assigned a participant ID during screening and is submitted for all screened participants.

**Item-specific Instructions:**

|                             |                                                                                                               |
|-----------------------------|---------------------------------------------------------------------------------------------------------------|
| <b>Screening Visit Date</b> | The screening visit date is the date which the participant provided a screening blood sample for HIV testing. |
|-----------------------------|---------------------------------------------------------------------------------------------------------------|

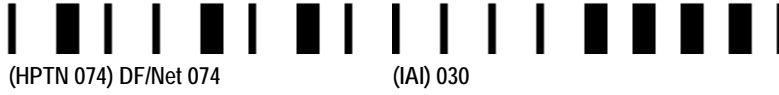

(HPTN 074) DF/Net 074

(IAI) 030

Visit Code:   .

Participant ID:

-     -  -

*Site Number      Network Number      Chk      Cohort*

Visit Date:

*dd      MMM      yy*

**Index ART Initiation**

**1** When did the participant indicate that s/he had initiated ART?

*dd      MMM      yy*

**2** How was ART use determined? *Mark all that apply.*

2a. Participant self-report

2b. Outside clinic report/documentation

2c. Other, specify: *Local language:* \_\_\_\_\_

*English:* \_\_\_\_\_

**3** Is the participant willing/able to provide documentation?

Yes

No → *If no, end of form.*

**4** Record ART medications prescribed for the participant:

|     | ART Medication Code                                            | Date Started                              |                                                                |                                           |
|-----|----------------------------------------------------------------|-------------------------------------------|----------------------------------------------------------------|-------------------------------------------|
|     |                                                                | <i>dd</i>                                 | <i>MMM</i>                                                     | <i>yy</i>                                 |
| 4a. | <input type="text"/> <input type="text"/> <input type="text"/> | <input type="text"/> <input type="text"/> | <input type="text"/> <input type="text"/> <input type="text"/> | <input type="text"/> <input type="text"/> |
| 4b. | <input type="text"/> <input type="text"/> <input type="text"/> | <input type="text"/> <input type="text"/> | <input type="text"/> <input type="text"/> <input type="text"/> | <input type="text"/> <input type="text"/> |
| 4c. | <input type="text"/> <input type="text"/> <input type="text"/> | <input type="text"/> <input type="text"/> | <input type="text"/> <input type="text"/> <input type="text"/> | <input type="text"/> <input type="text"/> |
| 4d. | <input type="text"/> <input type="text"/> <input type="text"/> | <input type="text"/> <input type="text"/> | <input type="text"/> <input type="text"/> <input type="text"/> | <input type="text"/> <input type="text"/> |
| 4e. | <input type="text"/> <input type="text"/> <input type="text"/> | <input type="text"/> <input type="text"/> | <input type="text"/> <input type="text"/> <input type="text"/> | <input type="text"/> <input type="text"/> |

Comments (*Local language*): \_\_\_\_\_

Comments (*English*): \_\_\_\_\_

This form documents an Index participant's initiation of ART during the course of the study. This CRF should only be completed once.

**Item-specific Instructions:**

|                    |                                                                                                                                                                                                                                                                                                           |
|--------------------|-----------------------------------------------------------------------------------------------------------------------------------------------------------------------------------------------------------------------------------------------------------------------------------------------------------|
| <b>Visit Date</b>  | Record the date of the study visit.                                                                                                                                                                                                                                                                       |
| <b>Item 1</b>      | Record the date that the participant indicates that he/she initiated ART.                                                                                                                                                                                                                                 |
| <b>Item 3</b>      | Details about the use of ART means a specific listing of medications prescribed. Use source documentation (clinic notes, prescription bottles, etc.). If participant reports ART use by self-report, mark "no."                                                                                           |
| <b>Items 4a-4e</b> | <ul style="list-style-type: none"><li>• <b>ART Medication Code:</b> Refer to the HPTN 074 website for the list of ART Medication Codes.</li><li>• <b>Date Started:</b> When possible, record the complete date (day, month, year). If the exact date is unavailable, record the month and year.</li></ul> |

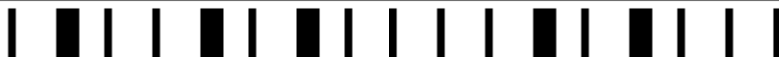

(HPTN 074) DF/Net 074

(SUT) 040

Visit Code:   .

Participant ID:

-      -  -

*Site Number      Network Number      Chk      Cohort*

Visit Date:

*dd      MMM      yy*

**Substance Use Treatment Initiation**

**1** When did the participant indicate that s/he had initiated substance use treatment?

*dd      MMM      yy*

**2** How was substance use treatment determined? *Mark all that apply.*

2a. Participant self-report

2b. Outside clinic report/documentation

2c. Other, specify: *Local language:* \_\_\_\_\_

*English:* \_\_\_\_\_

**3** Is the participant willing/able to provide details about his/her substance use treatment?

Yes       No      → *If no, end of form.*

**4** Record the types of substance use treatment the participant is involved in.

|                                                                                                      | <i>Yes</i>               | <i>No</i>                | <i>If yes, date of most recent visit:</i>                                                                                     |
|------------------------------------------------------------------------------------------------------|--------------------------|--------------------------|-------------------------------------------------------------------------------------------------------------------------------|
|                                                                                                      |                          |                          | <i>dd      MMM      yy</i>                                                                                                    |
| 4a. Methadone                                                                                        | <input type="checkbox"/> | <input type="checkbox"/> | <input type="text"/> <input type="text"/> <input type="text"/> <input type="text"/> <input type="text"/> <input type="text"/> |
| 4b. Buprenorphine                                                                                    | <input type="checkbox"/> | <input type="checkbox"/> | <input type="text"/> <input type="text"/> <input type="text"/> <input type="text"/> <input type="text"/> <input type="text"/> |
| 4c. Other medication (MAT), specify:<br><i>Local Language:</i> _____<br><i>English:</i> _____        | <input type="checkbox"/> | <input type="checkbox"/> | <input type="text"/> <input type="text"/> <input type="text"/> <input type="text"/> <input type="text"/> <input type="text"/> |
| 4d. Detoxification                                                                                   | <input type="checkbox"/> | <input type="checkbox"/> | <input type="text"/> <input type="text"/> <input type="text"/> <input type="text"/> <input type="text"/> <input type="text"/> |
| 4e. Community treatment/religious, specify:<br><i>Local Language:</i> _____<br><i>English:</i> _____ | <input type="checkbox"/> | <input type="checkbox"/> | <input type="text"/> <input type="text"/> <input type="text"/> <input type="text"/> <input type="text"/> <input type="text"/> |
| 4f. Other specify:<br><i>Local Language:</i> _____<br><i>English:</i> _____                          | <input type="checkbox"/> | <input type="checkbox"/> | <input type="text"/> <input type="text"/> <input type="text"/> <input type="text"/> <input type="text"/> <input type="text"/> |

Comments (*Local language*): \_\_\_\_\_

Comments (*English*): \_\_\_\_\_

This form documents a participant's initiation of substance use treatment during the course of the study. This CRF should be completed only once.

**Item-specific Instructions:**

|                    |                                                                                                                                                                                                                                             |
|--------------------|---------------------------------------------------------------------------------------------------------------------------------------------------------------------------------------------------------------------------------------------|
| <b>Visit Date</b>  | Record the date of the study visit.                                                                                                                                                                                                         |
| <b>Item 1</b>      | Record the date that the participant reports that s/he initiated substance use treatment. If the participant has started treatment more than once, indicate the most recent start date.                                                     |
| <b>Item 3</b>      | Details about the use of substance use treatment means a specific listing of any intervention (MMT, detox, religious, etc.) the participant is engaged in. Use source documentation (clinic notes, prescription bottles, etc.) if possible. |
| <b>Items 4a-4f</b> | <b>Date Started:</b> When possible, record the complete date (day, month, year). If the exact date is unavailable, record the month and year.                                                                                               |



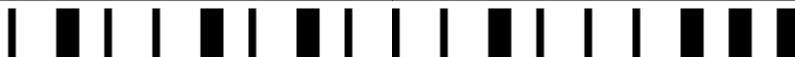

(HPTN 074) DF/Net 074

(BBA-1) 071

Participant ID:

|             |  |  |                |  |  |  |     |        |  |  |  |
|-------------|--|--|----------------|--|--|--|-----|--------|--|--|--|
|             |  |  |                |  |  |  |     |        |  |  |  |
| Site Number |  |  | Network Number |  |  |  | Chk | Cohort |  |  |  |

Assessment Date:

|    |  |     |  |    |  |
|----|--|-----|--|----|--|
|    |  |     |  |    |  |
| dd |  | MMM |  | yy |  |

**Baseline Behavior Assessment**

A broad range of participants are taking part in this study. So some questions may not apply to you. We ask the same questions of all participants.

In this interview, you will be asked about your sexual behaviors and possible alcohol and drug use. Some of the questions may seem very personal. Please remember that all of your answers will be kept private. Your responses are linked only to your study number, not to your name.

We need you to answer these questions honestly. We do not judge about alcohol or drug use. We make no judgments about how you have sex or the number of times or with whom.

These questions help us understand the type of behaviors our participants are doing while on study. Your honesty will help us understand these differences in behaviors.

**HIV TESTING HISTORY**

**1** Prior to participating in this study, did you ever have an HIV test?  Yes  No → If no, go to item 2.

1a. How many times have you had an HIV test in your lifetime?   # of times

1b. When was your most recent HIV test?        
dd MMM yy

1c. What was the result of that test?  Negative  Positive  Don't know

**INCARCERATION**

**2** In the last 3 months, how many different times were you in...

2a. Jail/prison?   # of times

2b. Involuntary detoxification/detention?   # of times

2c. Other incarceration, specify:   # of times

Local language: \_\_\_\_\_ English: \_\_\_\_\_

This assessment documents information on a participant's behaviors. These questions ask the participant to provide sensitive information. To increase honest and accurate responses it is important to demonstrate that all information will be kept private and confidential.

This is an interviewer-administered form.

**Item-specific Instructions:**

|                |                                                                                                                 |
|----------------|-----------------------------------------------------------------------------------------------------------------|
| <b>Item 1b</b> | When possible record the complete date (day, month, year). If the exact date is unknown, record month and year. |
|----------------|-----------------------------------------------------------------------------------------------------------------|

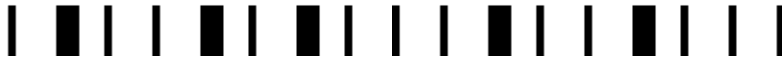

(HPTN 074) DF/Net 074

(BBA-2) 072

Participant ID:

|                    |  |  |                       |  |  |  |            |  |               |  |  |  |  |
|--------------------|--|--|-----------------------|--|--|--|------------|--|---------------|--|--|--|--|
|                    |  |  |                       |  |  |  |            |  |               |  |  |  |  |
| <i>Site Number</i> |  |  | <i>Network Number</i> |  |  |  | <i>Chk</i> |  | <i>Cohort</i> |  |  |  |  |

**Baseline Behavior Assessment**

**ALCOHOL USE (Audit C)** Answer questions to reflect your behavior over the past 3 months.

**3** How often do you have a drink containing alcohol?

*Never*      **→** *If never, go to item 6.*       *2-3 times a week*  
 *Monthly or less*       *4 or more times a week*  
 *2-4 times a month*

**4** How many standard drinks containing alcohol do you have on a typical day?

*1 or 2*       *7 to 9*  
 *3 or 4*       *10 or more*  
 *5 or 6*

**5** How often do you have six or more drinks on one occasion?

*Never*       *Weekly*  
 *Less than monthly*       *Daily or almost daily*  
 *Monthly*

**NON-INJECTION DRUG USE**

**6** In the last 3 months, did you...

|                                                                | <i>Yes</i>               | <i>No</i>                |
|----------------------------------------------------------------|--------------------------|--------------------------|
| 6a. Use marijuana?                                             | <input type="checkbox"/> | <input type="checkbox"/> |
| 6b. Use stimulants (cocaine, methamphetamines)?                | <input type="checkbox"/> | <input type="checkbox"/> |
| 6c. Use opiates (heroin, opium)?                               | <input type="checkbox"/> | <input type="checkbox"/> |
| 6d. Use other drugs ( <i>as indicated by sites</i> ), specify: | <input type="checkbox"/> | <input type="checkbox"/> |

*Local language:* \_\_\_\_\_

*English:* \_\_\_\_\_

**7** When was the last time you used marijuana, amphetamines, methadone, opiates or benzodiazepines that you did not inject?

*Never*  
 OR

*dd MMM yy*

This assessment documents information on a participant's behaviors. These questions ask the participant to provide sensitive information. To increase honest and accurate responses it is important to demonstrate that all information will be kept private and confidential.

This is an interviewer-administered form.

**Item-specific Instructions:**

|               |                                                                                                                                                                                                                                                            |
|---------------|------------------------------------------------------------------------------------------------------------------------------------------------------------------------------------------------------------------------------------------------------------|
| <b>Item 6</b> | Record any non-injected use of the drugs indicated (smoke, ingest, sniff, etc.). If appropriate, use local or street name of the drug.                                                                                                                     |
| <b>Item 7</b> | If the participant has never used these drugs in a non-injected method, mark "never." When possible record the complete date (day, month, year), if the exact date is unknown record month and year. If appropriate, use local or street name of the drug. |

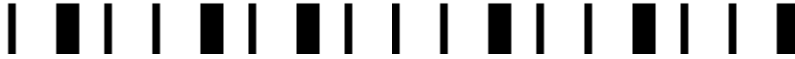

(HPTN 074) DF/Net 074

(BBA-3) 073

Participant ID:

|                    |  |  |                       |  |  |  |            |  |               |  |  |
|--------------------|--|--|-----------------------|--|--|--|------------|--|---------------|--|--|
|                    |  |  |                       |  |  |  |            |  |               |  |  |
| <i>Site Number</i> |  |  | <i>Network Number</i> |  |  |  | <i>Chk</i> |  | <i>Cohort</i> |  |  |

**Baseline Behavior Assessment**

**INJECTION DRUG USE**

|           |                                                                                                                                                   |                                                                                                                                                                         |                          |                                                                                                                                                                         |                                  |                                                                                                                 |                          |    |                                                                                                                 |                        |
|-----------|---------------------------------------------------------------------------------------------------------------------------------------------------|-------------------------------------------------------------------------------------------------------------------------------------------------------------------------|--------------------------|-------------------------------------------------------------------------------------------------------------------------------------------------------------------------|----------------------------------|-----------------------------------------------------------------------------------------------------------------|--------------------------|----|-----------------------------------------------------------------------------------------------------------------|------------------------|
| <b>8</b>  | How old were you when you first injected drugs?                                                                                                   | <input style="width: 20px; height: 20px;" type="text"/> <input style="width: 20px; height: 20px;" type="text"/>                                                         | <i>years</i>             |                                                                                                                                                                         |                                  |                                                                                                                 |                          |    |                                                                                                                 |                        |
| <b>9</b>  | What is the longest time you have not injected drugs, voluntarily (e.g. when you were not incarcerated), since you started using injection drugs? | <input style="width: 20px; height: 20px;" type="text"/> <input style="width: 20px; height: 20px;" type="text"/>                                                         | <i>months</i>            | <input style="width: 20px; height: 20px;" type="text"/> <input style="width: 20px; height: 20px;" type="text"/>                                                         | <i>days</i>                      | <input style="width: 20px; height: 20px;" type="text"/> <input style="width: 20px; height: 20px;" type="text"/> | <i>years</i>             |    |                                                                                                                 |                        |
| <b>10</b> | In the last 3 months, which of the following did you inject?                                                                                      |                                                                                                                                                                         |                          |                                                                                                                                                                         |                                  |                                                                                                                 |                          |    |                                                                                                                 |                        |
|           |                                                                                                                                                   | <i>Yes</i>                                                                                                                                                              | <i>No</i>                |                                                                                                                                                                         |                                  | <i>Yes</i>                                                                                                      | <i>No</i>                |    |                                                                                                                 |                        |
| 10a.      | Amphetamines                                                                                                                                      | <input type="checkbox"/>                                                                                                                                                | <input type="checkbox"/> | 10i.                                                                                                                                                                    | Ketamine                         | <input type="checkbox"/>                                                                                        | <input type="checkbox"/> |    |                                                                                                                 |                        |
| 10b.      | Methamphetamines                                                                                                                                  | <input type="checkbox"/>                                                                                                                                                | <input type="checkbox"/> | 10j.                                                                                                                                                                    | Homemade opioids                 | <input type="checkbox"/>                                                                                        | <input type="checkbox"/> |    |                                                                                                                 |                        |
| 10c.      | Cocaine                                                                                                                                           | <input type="checkbox"/>                                                                                                                                                | <input type="checkbox"/> | 10k.                                                                                                                                                                    | Short and long action stimulants | <input type="checkbox"/>                                                                                        | <input type="checkbox"/> |    |                                                                                                                 |                        |
| 10d.      | Heroin                                                                                                                                            | <input type="checkbox"/>                                                                                                                                                | <input type="checkbox"/> | 10l.                                                                                                                                                                    | Dezomorphine                     | <input type="checkbox"/>                                                                                        | <input type="checkbox"/> |    |                                                                                                                 |                        |
| 10e.      | Opium                                                                                                                                             | <input type="checkbox"/>                                                                                                                                                | <input type="checkbox"/> | 10m.                                                                                                                                                                    | Other, specify:                  | <input type="checkbox"/>                                                                                        | <input type="checkbox"/> |    |                                                                                                                 |                        |
| 10f.      | Buprenorphine                                                                                                                                     | <input type="checkbox"/>                                                                                                                                                | <input type="checkbox"/> | <i>Local language:</i> _____                                                                                                                                            |                                  |                                                                                                                 |                          |    |                                                                                                                 |                        |
| 10g.      | Methadone                                                                                                                                         | <input type="checkbox"/>                                                                                                                                                | <input type="checkbox"/> | <i>English:</i> _____                                                                                                                                                   |                                  |                                                                                                                 |                          |    |                                                                                                                 |                        |
| 10h.      | Benzodiazepines                                                                                                                                   | <input type="checkbox"/>                                                                                                                                                | <input type="checkbox"/> |                                                                                                                                                                         |                                  |                                                                                                                 |                          |    |                                                                                                                 |                        |
| <b>11</b> | In the last month, on how many days did you inject drugs?                                                                                         | <input style="width: 20px; height: 20px;" type="text"/> <input style="width: 20px; height: 20px;" type="text"/>                                                         | <i># of days</i>         |                                                                                                                                                                         |                                  |                                                                                                                 |                          |    |                                                                                                                 |                        |
| <b>12</b> | In the last month, on days that you injected, how many times a day did you usually inject drugs?                                                  | <input style="width: 20px; height: 20px;" type="text"/> <input style="width: 20px; height: 20px;" type="text"/>                                                         | <i># of times a day</i>  |                                                                                                                                                                         |                                  |                                                                                                                 |                          |    |                                                                                                                 |                        |
| <b>13</b> | When was the last day you injected (including today)?                                                                                             | <input style="width: 20px; height: 20px;" type="text"/> <input style="width: 20px; height: 20px;" type="text"/> <input style="width: 20px; height: 20px;" type="text"/> | <i>dd</i>                | <input style="width: 20px; height: 20px;" type="text"/> <input style="width: 20px; height: 20px;" type="text"/> <input style="width: 20px; height: 20px;" type="text"/> | <i>MMM</i>                       | <input style="width: 20px; height: 20px;" type="text"/> <input style="width: 20px; height: 20px;" type="text"/> | <i>yy</i>                | OR | <input style="width: 20px; height: 20px;" type="text"/> <input style="width: 20px; height: 20px;" type="text"/> | <i># of months ago</i> |

This assessment documents information on a participant's behaviors. These questions ask the participant to provide sensitive information. To increase honest and accurate responses it is important to demonstrate that all information will be kept private and confidential.

This is an interviewer-administered form.

**Item-specific Instructions:**

|                |                                                                                                                                |
|----------------|--------------------------------------------------------------------------------------------------------------------------------|
| <b>Item 9</b>  | Record the longest period of time the participant has abstained from injecting drugs since he/she first began injecting drugs. |
| <b>Item 10</b> | If appropriate, use local or street name of the drug.                                                                          |
| <b>Item 13</b> | When possible, record the complete date (day, month & year). If the exact date is unknown, record month and year.              |

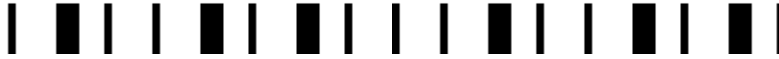

(HPTN 074) DF/Net 074

(BBA-4) 074

Participant ID:

|                    |  |  |                       |  |  |  |            |               |  |  |  |  |
|--------------------|--|--|-----------------------|--|--|--|------------|---------------|--|--|--|--|
|                    |  |  |                       |  |  |  |            |               |  |  |  |  |
| <i>Site Number</i> |  |  | <i>Network Number</i> |  |  |  | <i>Chk</i> | <i>Cohort</i> |  |  |  |  |

**Baseline Behavior Assessment**

**SHARING**

*Often people share syringes and other equipment because they are in a rush, they are concerned about the police, feeling sick or for a variety of other reasons.*

|           |                                                                    | <i>Yes</i>               | <i>No</i>                | <i>Don't know</i>        |
|-----------|--------------------------------------------------------------------|--------------------------|--------------------------|--------------------------|
| <b>14</b> | Have you shared rinse water in the last 3 months?                  | <input type="checkbox"/> | <input type="checkbox"/> | <input type="checkbox"/> |
|           | 14a. The last time you injected, did you share rinse water?        | <input type="checkbox"/> | <input type="checkbox"/> | <input type="checkbox"/> |
| <b>15</b> | Have you shared a cooker/container in the last 3 months?           | <input type="checkbox"/> | <input type="checkbox"/> | <input type="checkbox"/> |
|           | 15a. The last time you injected, did you share a cooker/container? | <input type="checkbox"/> | <input type="checkbox"/> | <input type="checkbox"/> |
| <b>16</b> | Have you shared filter cotton in the last 3 months?                | <input type="checkbox"/> | <input type="checkbox"/> | <input type="checkbox"/> |
|           | 16a. The last time you injected, did you share filter cotton?      | <input type="checkbox"/> | <input type="checkbox"/> | <input type="checkbox"/> |

**CLEANING**

|           |                                                                           |                                                                                                                                                                                              |                          |                          |                                        |
|-----------|---------------------------------------------------------------------------|----------------------------------------------------------------------------------------------------------------------------------------------------------------------------------------------|--------------------------|--------------------------|----------------------------------------|
| <b>17</b> | How often do you clean your needle before injecting?                      | <input type="checkbox"/> <i>Always</i> <input type="checkbox"/> <i>More than half the time</i> <input type="checkbox"/> <i>Less than half the time</i> <input type="checkbox"/> <i>Never</i> |                          |                          |                                        |
| <b>18</b> | The last time you injected, did you clean the needle before you injected? | <input type="checkbox"/>                                                                                                                                                                     | <input type="checkbox"/> | <input type="checkbox"/> | <i>Yes</i> <i>No</i> <i>Don't know</i> |
| <b>19</b> | The last time you injected, did you use a new needle?                     | <input type="checkbox"/>                                                                                                                                                                     | <input type="checkbox"/> | <input type="checkbox"/> | <i>Yes</i> <i>No</i> <i>Don't know</i> |
| <b>20</b> | How often do you clean your needle after injecting?                       | <input type="checkbox"/> <i>Always</i> <input type="checkbox"/> <i>More than half the time</i> <input type="checkbox"/> <i>Less than half the time</i> <input type="checkbox"/> <i>Never</i> |                          |                          |                                        |
| <b>21</b> | The last time you injected, did you clean the needle after you injected?  | <input type="checkbox"/>                                                                                                                                                                     | <input type="checkbox"/> | <input type="checkbox"/> | <i>Yes</i> <i>No</i> <i>Don't know</i> |

This assessment documents information on a participant's behaviors. These questions ask the participant to provide sensitive information. To increase honest and accurate responses it is important to demonstrate that all information will be kept private and confidential.

This is an interviewer-administered form.



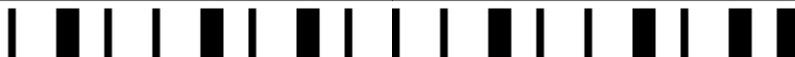

(HPTN 074) DF/Net 074

(BBA-5) 075

Participant ID:

|                    |  |  |                       |  |  |  |            |               |  |  |  |  |
|--------------------|--|--|-----------------------|--|--|--|------------|---------------|--|--|--|--|
|                    |  |  |                       |  |  |  |            |               |  |  |  |  |
| <i>Site Number</i> |  |  | <i>Network Number</i> |  |  |  | <i>Chk</i> | <i>Cohort</i> |  |  |  |  |

**Baseline Behavior Assessment**

**PRE-FILLING AND BACKLOADING SYRINGES**

**22** The last time you injected, did you use a pre-filled syringe?  Yes  No  Don't know

**23** The last time you injected, did you inject drugs that were frontloaded or backloaded into the syringe or needle that you used?  Yes  No  Don't know

**24** In the last 3 months, how many different people did you use injection drugs with?    # of people → If 000, go to item 30.

**25** In the last 3 months, how many times did you even once pass on a needle or syringe to someone else after you used it?    # of times → If 000, go to item 27.

**26** In the last 3 months, with how many different people did you pass on a needle or syringe after you had used it?    # of people

**27** In the last 3 months, how many times did you ever, even once, use a needle or syringe after someone else used it?    # of times → If 000, go to item 29.

**28** In the last 3 months, with how many different people did you use a needle or syringe after someone else used it?    # of people

**29** In the past 3 months, when you shared syringes, how often did you inject last?

Always                       Most times                       Sometimes  
 Rarely                               Never                               I have not shared in the past 3 months

**30** In the last 3 months, did you get your new needles/syringes from a...

30a.  I did not get new needles in the last 3 months → Go to item 32 on page 6.

|                                 |                          |                          |
|---------------------------------|--------------------------|--------------------------|
|                                 | Yes                      | No                       |
| 30b. Pharmacy or health center? | <input type="checkbox"/> | <input type="checkbox"/> |
| 30c. Needle seller?             | <input type="checkbox"/> | <input type="checkbox"/> |
| 30d. Needle exchange?           | <input type="checkbox"/> | <input type="checkbox"/> |
| 30e. Other drug injectors?      | <input type="checkbox"/> | <input type="checkbox"/> |
| 30f. Other, specify?            | <input type="checkbox"/> | <input type="checkbox"/> |

Local language: \_\_\_\_\_ English: \_\_\_\_\_

This assessment documents information on a participant's behaviors. These questions ask the participant to provide sensitive information. To increase honest and accurate responses it is important to demonstrate that all information will be kept private and confidential.

This is an interviewer-administered form.

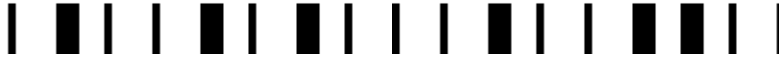

(HPTN 074) DF/Net 074

(BBA-6) 076

Participant ID:

|                    |  |  |                       |  |  |  |            |  |               |  |  |  |  |
|--------------------|--|--|-----------------------|--|--|--|------------|--|---------------|--|--|--|--|
|                    |  |  |                       |  |  |  |            |  |               |  |  |  |  |
| <i>Site Number</i> |  |  | <i>Network Number</i> |  |  |  | <i>Chk</i> |  | <i>Cohort</i> |  |  |  |  |

**Baseline Behavior Assessment**

**PRE-FILLING AND BACKLOADING SYRINGES**

**31** In the last 3 months, when you obtained new needles, typically, how many did you buy at one time? 


 # of needles

**DRUG TREATMENT PROGRAMS** *Indicate which types of treatment you have participated in.*

**32** Have you ever participated in any type of drug treatment program?  Yes  No → *If no, go to item 36 on page 7.*

**33** Methadone maintenance or any other medication assisted treatment program (MMT/MAT)?  Yes  No → *If no, go to item 34 on page 7.*

33a. What type of MMT/MAT program have you been on? **Mark all that apply.**

- |                                              |                                                                          |
|----------------------------------------------|--------------------------------------------------------------------------|
| <input type="checkbox"/> 33a1. Methadone     | <input type="checkbox"/> 33a3. Other, specify:<br>(Local language) _____ |
| <input type="checkbox"/> 33a2. Buprenorphine | (English) _____                                                          |

33b. How many times have you enrolled in MMT/MAT? 


 # of times

33c. What is the longest period of time you have been in MMT/MAT? 

 months
 
 days

33d. Have you participated in MMT/MAT in the last 3 months?  Yes  No → *If no, go to item 34 on page 7.*

33e. What type of MMT/MAT program have you been on in the last 3 months? **Mark all that apply.**

- |                                              |                                                                          |
|----------------------------------------------|--------------------------------------------------------------------------|
| <input type="checkbox"/> 33e1. Methadone     | <input type="checkbox"/> 33e3. Other, specify:<br>(Local language) _____ |
| <input type="checkbox"/> 33e2. Buprenorphine | (English) _____                                                          |

33f. Are you currently in MMT/MAT?  Yes  No  
→ *If yes, complete the Substance Use Treatment Initiation CRF.*

This assessment documents information on a participant's behaviors. These questions ask the participant to provide sensitive information. To increase honest and accurate responses it is important to demonstrate that all information will be kept private and confidential.

This is an interviewer-administered form.

**Item-specific Instructions:**

|                 |                                                                                                                                                                                                                 |
|-----------------|-----------------------------------------------------------------------------------------------------------------------------------------------------------------------------------------------------------------|
| <b>Item 31</b>  | If the participant has not obtained his/her own needles or cannot remember, enter "000."                                                                                                                        |
| <b>Item 33c</b> | Enter both the number of months <u>and</u> days participant was in MMT/MAT. Do not leave any boxes blank.<br>For example, 3 years is 36 months and 00 days. 6 weeks would be recorded as 01 months and 14 days. |

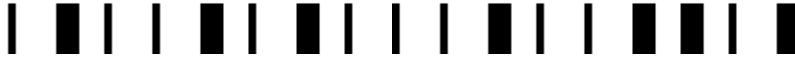

(HPTN 074) DF/Net 074

(BBA-7) 077

Participant ID:

|             |  |  |                |  |  |  |     |  |        |  |  |
|-------------|--|--|----------------|--|--|--|-----|--|--------|--|--|
|             |  |  |                |  |  |  |     |  |        |  |  |
| Site Number |  |  | Network Number |  |  |  | Chk |  | Cohort |  |  |

**Baseline Behavior Assessment**

**DRUG TREATMENT PROGRAMS**

|           |                                                                                |                                                                                  |                             |                                                                                  |      |
|-----------|--------------------------------------------------------------------------------|----------------------------------------------------------------------------------|-----------------------------|----------------------------------------------------------------------------------|------|
| <b>34</b> | A health care provider supported drug detoxification program?                  | <input type="checkbox"/> Yes                                                     | <input type="checkbox"/> No | → If no, go to item 35.                                                          |      |
|           | 34a. How many times have you enrolled in detoxification?                       | <input style="width: 30px; height: 20px; border: 1px solid black;" type="text"/> | # of times                  |                                                                                  |      |
|           | 34b. What is the longest period of time you have been in detoxification?       | <input style="width: 30px; height: 20px; border: 1px solid black;" type="text"/> | months                      | <input style="width: 30px; height: 20px; border: 1px solid black;" type="text"/> | days |
|           | 34c. Have you participated in detoxification in the last 3 months?             | <input type="checkbox"/> Yes                                                     | <input type="checkbox"/> No | → If no, go to item 35.                                                          |      |
|           | 34d. Are you currently in detoxification?                                      | <input type="checkbox"/> Yes                                                     | <input type="checkbox"/> No |                                                                                  |      |
| <b>35</b> | Any type of other drug treatment program (e.g. community treatment/religious)? | <input type="checkbox"/> Yes                                                     | <input type="checkbox"/> No | → If no, go to item 36.                                                          |      |
|           | 35a. How many times have you enrolled in any other type of drug treatment?     | <input style="width: 30px; height: 20px; border: 1px solid black;" type="text"/> | # of times                  |                                                                                  |      |
|           | 35b. What is the longest period of time you have been in this type of program? | <input style="width: 30px; height: 20px; border: 1px solid black;" type="text"/> | months                      | <input style="width: 30px; height: 20px; border: 1px solid black;" type="text"/> | days |
|           | 35c. Have you participated in this type of program in the last 3 months?       | <input type="checkbox"/> Yes                                                     | <input type="checkbox"/> No | → If no, go to item 36.                                                          |      |
|           | 35d. Are you currently in this type of program?                                | <input type="checkbox"/> Yes                                                     | <input type="checkbox"/> No |                                                                                  |      |

**SEXUAL BEHAVIOR QUESTIONS**

*The next few questions are about sexual behavior. These are very personal questions. Please remember that all the information you give us is confidential. We ask that you answer the questions as honestly as you can.*

|           |                                                                         |                                                                                  |                             |                                   |
|-----------|-------------------------------------------------------------------------|----------------------------------------------------------------------------------|-----------------------------|-----------------------------------|
| <b>36</b> | In the last 3 months, did you have vaginal or anal sex?                 | <input type="checkbox"/> Yes                                                     | <input type="checkbox"/> No | → If no, go to item 42 on page 8. |
| <b>37</b> | In the last month, how many different female sex partners have you had? | <input style="width: 30px; height: 20px; border: 1px solid black;" type="text"/> | # of female sex partners    |                                   |
| <b>38</b> | In the last month, how many different male sex partners have you had?   | <input style="width: 30px; height: 20px; border: 1px solid black;" type="text"/> | # of male sex partners      |                                   |

This assessment documents information on a participant's behaviors. These questions ask the participant to provide sensitive information. To increase honest and accurate responses it is important to demonstrate that all information will be kept private and confidential.

This is an interviewer-administered form.

**Item-specific Instructions:**

|                 |                                                                                                                                                                                                                            |
|-----------------|----------------------------------------------------------------------------------------------------------------------------------------------------------------------------------------------------------------------------|
| <b>Item 34</b>  | Health care provider supported drug detoxification program can be voluntary or involuntary, in-patient or out-patient. Do not include alcohol-only detoxification programs.                                                |
| <b>Item 34b</b> | Enter both the number of months <u>and</u> days participant was in detoxification. Do not leave any boxes blank.<br><br>For example, 3 years is 36 months and 00 days. 6 weeks would be recorded as 01 months and 14 days. |
| <b>Item 35</b>  | Other includes any secular, religious-based, or home based programs that are not supported by a healthcare provider.                                                                                                       |
| <b>Item 35b</b> | Enter both the number of months and days participant was in MMT/MAT. Do not leave any boxes blank.<br><br>For example, 3 years is 36 months and 00 days. 6 weeks would be recorded as 01 months and 14 days.               |

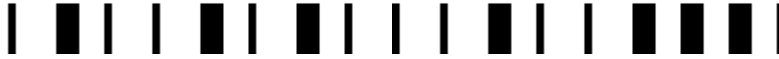

(HPTN 074) DF/Net 074

(BBA-8) 078

Participant ID:

|                    |  |  |                       |  |  |  |            |  |               |  |  |
|--------------------|--|--|-----------------------|--|--|--|------------|--|---------------|--|--|
|                    |  |  |                       |  |  |  |            |  |               |  |  |
| <i>Site Number</i> |  |  | <i>Network Number</i> |  |  |  | <i>Chk</i> |  | <i>Cohort</i> |  |  |

**Baseline Behavior Assessment**

**39** Do you have a main partner such as a husband/wife or boyfriend/girlfriend?  Yes  No → *If no, go to item 41.*

39a. Is your main partner male or female?

Male  Female  Other, specify: *(Local language)* \_\_\_\_\_  
*(English)* \_\_\_\_\_

**40** In the last month, how many times did you have vaginal or anal sex with your main partner?  # of times → *If 000, go to item 41.*

40a. How many of these times did you (or your partner) use a condom?  # of times

**41** In the last month, how many times did you have vaginal or anal sex with someone other than a main partner?  # of times → *If 000, go to item 42.*

41a. How many of these times did you (or your partner) use a condom?  # of times

*Next I am going to ask about your sex trade (paid or paying) partners. By sex trade partners, I mean people that you had oral, vaginal or anal sex with in exchange for money, drugs, food or a place to stay.*

**42** In the last month, how many times did you give sex partners money or drugs in exchange for sex?  # of times

**43** In the last month, how many times did a sex partner give you money or drugs in exchange for sex?  # of times

This assessment documents information on a participant's behaviors. These questions ask the participant to provide sensitive information. To increase honest and accurate responses it is important to demonstrate that all information will be kept private and confidential.

This is an interviewer-administered form.

**Item-specific Instructions:**

|                |                                                                                                                                                                                                                                                                                           |
|----------------|-------------------------------------------------------------------------------------------------------------------------------------------------------------------------------------------------------------------------------------------------------------------------------------------|
| <b>Item 39</b> | "Main partner" is someone you consider your wife/husband/boyfriend/girlfriend, have oral, vaginal or anal sex with, have been in a relationship with for at least 3 weeks. Do not include anyone you have had sex with casually or in exchange for money, drugs, food or a place to stay. |
|----------------|-------------------------------------------------------------------------------------------------------------------------------------------------------------------------------------------------------------------------------------------------------------------------------------------|



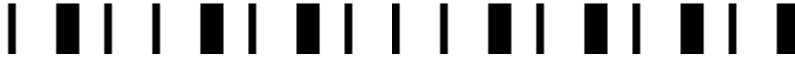

(HPTN 074) DF/Net 074

(IBH-1) 085

Participant ID:

|                    |  |  |                       |  |  |  |            |               |  |  |
|--------------------|--|--|-----------------------|--|--|--|------------|---------------|--|--|
|                    |  |  |                       |  |  |  |            |               |  |  |
| <i>Site Number</i> |  |  | <i>Network Number</i> |  |  |  | <i>Chk</i> | <i>Cohort</i> |  |  |

Assessment Date:

|           |  |            |  |           |  |
|-----------|--|------------|--|-----------|--|
|           |  |            |  |           |  |
| <i>dd</i> |  | <i>MMM</i> |  | <i>yy</i> |  |

**Index Baseline HIV Care and ART**

*The next few questions are about anti-HIV medicines called antiretroviral therapy that you may be taking. These questions are not about drugs you may be taking to treat substance use. We need to know what is really happening, not what you think we "want to hear." Many people find it hard to take their medications all of the time.*

**1** When did you first find out that you were HIV positive? 

|           |  |            |  |           |  |
|-----------|--|------------|--|-----------|--|
|           |  |            |  |           |  |
| <i>dd</i> |  | <i>MMM</i> |  | <i>yy</i> |  |

**2** With whom have you shared that you are living with HIV? *Mark all that apply.*

|                                                            |                                                   |                                               |
|------------------------------------------------------------|---------------------------------------------------|-----------------------------------------------|
| <input type="checkbox"/> 2a. Spouse/partner/girl-boyfriend | <input type="checkbox"/> 2d. Other family members | <input type="checkbox"/> 2g. No one           |
| <input type="checkbox"/> 2b. Own children                  | <input type="checkbox"/> 2e. Friends              | <input type="checkbox"/> 2h. Refuse to answer |
| <input type="checkbox"/> 2c. Parents                       | <input type="checkbox"/> 2f. Others               |                                               |

**3** How many of your drug partners (the people you inject drugs with) know that you have HIV?

- All of my partners
- More than half of my partners
- Less than half of my partners
- None of my partners

This is an interviewer-administered form.

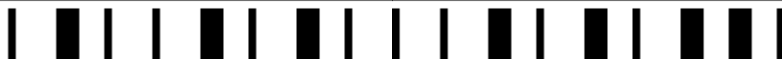

(HPTN 074) DF/Net 074

(IBH-2) 086

Participant ID:

|             |  |  |                |  |  |  |     |  |        |  |  |
|-------------|--|--|----------------|--|--|--|-----|--|--------|--|--|
|             |  |  |                |  |  |  |     |  |        |  |  |
| Site Number |  |  | Network Number |  |  |  | Chk |  | Cohort |  |  |

**Index Baseline HIV Care and ART**

**4** Who is the most supportive in helping you with your HIV care and treatment?

Health care providers (such as doctors or nurses)

Your spouse/live-in partner/long-term partner

Casual sexual partner (i.e., friends or associates who you just met and had sex with)

Injecting partners

Commercial sex workers

Your mother and father

Your in-laws

Other family members

Priests/religious leaders

Your neighbors or community members

Friends

Your employers

Other, specify: (Local language) \_\_\_\_\_  
(English) \_\_\_\_\_

**5** How often have you talked to your family or support person about your HIV medications?

More than once per week                       2-3 times a month                       One time

Once a week                                               Once a month                                               Never

**6** Since you found out you were living with HIV, have you seen an HIV clinician?                       Yes                       No                      → *If no, go to item 8 on page 3.*

6a. If yes, on what date was your most recent visit?                      dd                      MMM                      yy

|  |  |  |  |  |  |  |  |
|--|--|--|--|--|--|--|--|
|  |  |  |  |  |  |  |  |
|--|--|--|--|--|--|--|--|

**7** Has any HIV clinician ever told you that you should initiate ART treatment for your own health?                       Yes                       No

This is an interviewer-administered form.

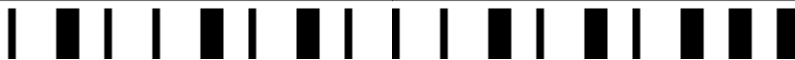

(HPTN 074) DF/Net 074

(IBH-3) 087

Participant ID:

|                    |  |  |                       |  |  |  |            |               |  |  |  |
|--------------------|--|--|-----------------------|--|--|--|------------|---------------|--|--|--|
|                    |  |  |                       |  |  |  |            |               |  |  |  |
| <i>Site Number</i> |  |  | <i>Network Number</i> |  |  |  | <i>Chk</i> | <i>Cohort</i> |  |  |  |

**Index Baseline HIV Care and ART**

**8** Have you ever visited an HIV clinic or pharmacy with the intention of starting ART?  Yes  No

**9** Have you ever been on ART treatment?  Yes  No

**10** Are you currently taking ART medications? *If yes, complete Index ART Initiation CRF.*  Yes  No  
*If no, go to Item 16 on page 5.*

**11** We know that it is very difficult to take your HIV medications all the time. When was the last time you missed taking any doses of your ART medication?

*Within the past week*       *3-4 weeks ago*       *Never missed taking medications in past 3 months*

*1-2 weeks ago*       *1-3 months ago*      *End of form.*

**12** In the last month, on about how many days did you miss at least one tablet?   days

**13** Did you miss at least one tablet in the last four days?  Yes  No  
*If no, go to Item 15 on page 4.*

13a. In the last four days, on how many days did you miss at least one tablet?   days

**14** Did you miss at least one tablet yesterday?  Yes  No

This is an interviewer-administered form.

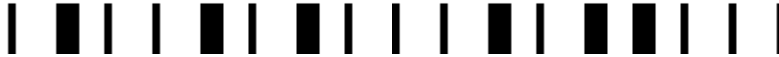

(HPTN 074) DF/Net 074

(IBH-4) 088

No data recorded on this page

Participant ID:

|                      |                      |                      |                      |                      |                      |                      |                      |                      |                      |
|----------------------|----------------------|----------------------|----------------------|----------------------|----------------------|----------------------|----------------------|----------------------|----------------------|
| <input type="text"/> | <input type="text"/> | <input type="text"/> | <input type="text"/> | <input type="text"/> | <input type="text"/> | <input type="text"/> | <input type="text"/> | <input type="text"/> | <input type="text"/> |
| Site Number          |                      | Network Number       |                      |                      | Chk                  | Cohort               |                      |                      |                      |

**Index Baseline HIV Care and ART**

**15** The last time you missed at least one tablet, which of these best describes the reason why? *Mark only one. End of form.*

- I forgot
- I did not have the medication with me at the time I needed to take it
- I did not want person(s) nearby to see me taking the medication
- I was trying to avoid side effects
- I felt healthy
- I was drunk
- I am not engaging in any behaviors that can transmit HIV to others
- I do not believe the medicines are beneficial
- Not applicable
- Other, specify: (Local language) \_\_\_\_\_  
(English) \_\_\_\_\_

This is an interviewer-administered form.

**Item-specific Instructions:**

|                                      |                                                                                                              |
|--------------------------------------|--------------------------------------------------------------------------------------------------------------|
| <b>No data recorded on this page</b> | Mark this box if no data is recorded on this page other than the Participant ID and the Staff Initials/Date. |
|--------------------------------------|--------------------------------------------------------------------------------------------------------------|



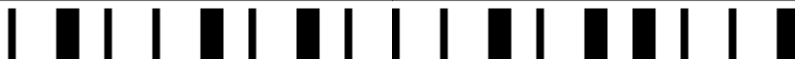

(HPTN 074) DF/Net 074

(IBH-5) 089

No data recorded on this page

Participant ID:

|                    |  |  |                       |  |  |            |  |               |  |
|--------------------|--|--|-----------------------|--|--|------------|--|---------------|--|
|                    |  |  |                       |  |  |            |  |               |  |
| <i>Site Number</i> |  |  | <i>Network Number</i> |  |  | <i>Chk</i> |  | <i>Cohort</i> |  |

**Index Baseline HIV Care and ART**

|           | Sometimes people have trouble starting HIV treatment (ART) because of personal situations or circumstances. What are the reasons you have not started taking ART? | <i>Agree</i>             | <i>Disagree</i>          | <i>Not relevant/<br/>Not Applicable</i> |
|-----------|-------------------------------------------------------------------------------------------------------------------------------------------------------------------|--------------------------|--------------------------|-----------------------------------------|
| <b>16</b> |                                                                                                                                                                   |                          |                          |                                         |
|           | 16a. You don't think that you need it.                                                                                                                            | <input type="checkbox"/> | <input type="checkbox"/> | <input type="checkbox"/>                |
|           | 16b. You don't have time to go to the clinic.                                                                                                                     | <input type="checkbox"/> | <input type="checkbox"/> | <input type="checkbox"/>                |
|           | 16c. You don't have the energy or motivation to go to the clinic.                                                                                                 | <input type="checkbox"/> | <input type="checkbox"/> | <input type="checkbox"/>                |
|           | 16d. You missed an appointment, so it is difficult to go back.                                                                                                    | <input type="checkbox"/> | <input type="checkbox"/> | <input type="checkbox"/>                |
|           | 16e. You have been too sick to go to the clinic.                                                                                                                  | <input type="checkbox"/> | <input type="checkbox"/> | <input type="checkbox"/>                |
|           | 16f. Your drug use got in the way of going to the clinic.                                                                                                         | <input type="checkbox"/> | <input type="checkbox"/> | <input type="checkbox"/>                |
|           | 16g. You are worried about the unwanted side effects or complications.                                                                                            | <input type="checkbox"/> | <input type="checkbox"/> | <input type="checkbox"/>                |
|           | 16h. You don't understand when you are supposed to take each pill.                                                                                                | <input type="checkbox"/> | <input type="checkbox"/> | <input type="checkbox"/>                |
|           | 16i. You sold or lost your medicine or your medicine was stolen.                                                                                                  | <input type="checkbox"/> | <input type="checkbox"/> | <input type="checkbox"/>                |
|           | 16j. Your drinking (alcohol) got in the way of you going to the clinic.                                                                                           | <input type="checkbox"/> | <input type="checkbox"/> | <input type="checkbox"/>                |
|           | 16k. You had to wait too long, so you left without being seen.                                                                                                    | <input type="checkbox"/> | <input type="checkbox"/> | <input type="checkbox"/>                |
| <b>17</b> |                                                                                                                                                                   |                          |                          |                                         |
|           | 17a. You don't have enough support from family or friends.                                                                                                        | <input type="checkbox"/> | <input type="checkbox"/> | <input type="checkbox"/>                |
|           | 17b. You don't want others to know you have HIV (e.g., see me take medication).                                                                                   | <input type="checkbox"/> | <input type="checkbox"/> | <input type="checkbox"/>                |

This is an interviewer-administered form.

**Item-specific Instructions:**

|                                      |                                                                                                              |
|--------------------------------------|--------------------------------------------------------------------------------------------------------------|
| <b>No data recorded on this page</b> | Mark this box if no data is recorded on this page other than the Participant ID and the Staff Initials/Date. |
|--------------------------------------|--------------------------------------------------------------------------------------------------------------|

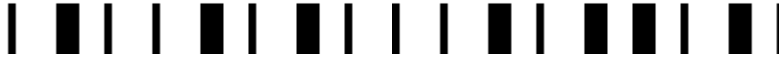

(HPTN 074) DF/Net 074

(IBH-6) 090

No data recorded on this page

Participant ID:

|                      |                      |                      |                      |                      |                      |                      |                      |
|----------------------|----------------------|----------------------|----------------------|----------------------|----------------------|----------------------|----------------------|
| <input type="text"/> | <input type="text"/> | <input type="text"/> | <input type="text"/> | <input type="text"/> | <input type="text"/> | <input type="text"/> | <input type="text"/> |
| Site Number          |                      | Network Number       |                      |                      | Chk                  | Cohort               |                      |

**Index Baseline HIV Care and ART**

| 18   | Many people find it difficult to start taking ART, even if they have previously tried, because of challenges in the health systems/health care process. What were the reasons you have not started taking ART? | Agree                    | Disagree                 | Not relevant/<br>Not Applicable |
|------|----------------------------------------------------------------------------------------------------------------------------------------------------------------------------------------------------------------|--------------------------|--------------------------|---------------------------------|
| 18a. | You do not have the necessary materials (e.g. paperwork, identification, test results) needed by the clinic.                                                                                                   | <input type="checkbox"/> | <input type="checkbox"/> | <input type="checkbox"/>        |
| 18b. | ART is too expensive.                                                                                                                                                                                          | <input type="checkbox"/> | <input type="checkbox"/> | <input type="checkbox"/>        |
| 18c. | ART was not available.                                                                                                                                                                                         | <input type="checkbox"/> | <input type="checkbox"/> | <input type="checkbox"/>        |
| 18d. | HIV care provider would not continue your medicine or prescription.                                                                                                                                            | <input type="checkbox"/> | <input type="checkbox"/> | <input type="checkbox"/>        |
| 18e. | You do not know how or where to get ART.                                                                                                                                                                       | <input type="checkbox"/> | <input type="checkbox"/> | <input type="checkbox"/>        |
| 18f. | You find transport/travel to the clinic is difficult.                                                                                                                                                          | <input type="checkbox"/> | <input type="checkbox"/> | <input type="checkbox"/>        |
| 18g. | You have been traveling.                                                                                                                                                                                       | <input type="checkbox"/> | <input type="checkbox"/> | <input type="checkbox"/>        |
| 18h. | You have been in jail or incarcerated.                                                                                                                                                                         | <input type="checkbox"/> | <input type="checkbox"/> | <input type="checkbox"/>        |
| 18i. | You are scared of being arrested for your drug use.                                                                                                                                                            | <input type="checkbox"/> | <input type="checkbox"/> | <input type="checkbox"/>        |
| 18j. | You will need to register with the government as being a drug user.                                                                                                                                            | <input type="checkbox"/> | <input type="checkbox"/> | <input type="checkbox"/>        |

**19** Are there any other reasons you find it difficult to start taking ART?

Local language: \_\_\_\_\_

English: \_\_\_\_\_

This is an interviewer-administered form.

**Item-specific Instructions:**

|                                      |                                                                                                              |
|--------------------------------------|--------------------------------------------------------------------------------------------------------------|
| <b>No data recorded on this page</b> | Mark this box if no data is recorded on this page other than the Participant ID and the Staff Initials/Date. |
|--------------------------------------|--------------------------------------------------------------------------------------------------------------|

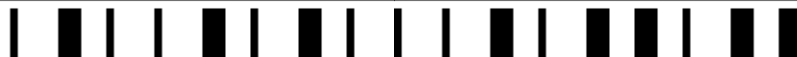

(HPTN 074) DF/Net 074

(IE) 091

Participant ID:

|                    |  |  |                       |  |  |  |            |               |  |
|--------------------|--|--|-----------------------|--|--|--|------------|---------------|--|
|                    |  |  |                       |  |  |  |            |               |  |
| <i>Site Number</i> |  |  | <i>Network Number</i> |  |  |  | <i>Chk</i> | <i>Cohort</i> |  |

Enrollment Date:

|           |  |            |  |           |  |
|-----------|--|------------|--|-----------|--|
|           |  |            |  |           |  |
| <i>dd</i> |  | <i>MMM</i> |  | <i>yy</i> |  |

**Index Enrollment**

**1** Did the participant agree to have their samples of blood collected at enrollment used for future testing related to HIV infection?

*Yes*

*No*

**2** Did the participant agree to have their samples of urine collected at enrollment used for future testing related to drug use?

*Yes*

*No*

**3** To which study arm is the participant assigned?

*Standard of care*

*Intervention*

This form is completed at Enrollment only.

**Item-specific Instructions:**

|                      |                                                                                                                               |
|----------------------|-------------------------------------------------------------------------------------------------------------------------------|
| <b>Items 1 and 2</b> | Document the index participant's decision regarding enrollment specimen storage as documented on the enrollment consent form. |
|----------------------|-------------------------------------------------------------------------------------------------------------------------------|

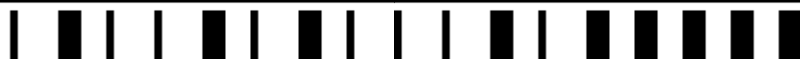

(HPTN 074) DF/Net 074

(PE) 095

Participant ID:

|                    |  |  |                       |  |  |  |            |               |  |
|--------------------|--|--|-----------------------|--|--|--|------------|---------------|--|
|                    |  |  |                       |  |  |  |            |               |  |
| <i>Site Number</i> |  |  | <i>Network Number</i> |  |  |  | <i>Chk</i> | <i>Cohort</i> |  |

Enrollment Date:

|           |  |            |  |           |  |
|-----------|--|------------|--|-----------|--|
|           |  |            |  |           |  |
| <i>dd</i> |  | <i>MMM</i> |  | <i>yy</i> |  |

**Partner Enrollment**

**1** Did the participant agree to have their samples of blood collected at enrollment used for future testing related to HIV infection?

*Yes*

*No*

**2** Did the participant agree to have their samples of urine collected at enrollment used for future testing related to drug use?

*Yes*

*No*

**3** At which index visit was this network partner enrolled?

Index Visit Code: 

|  |  |
|--|--|
|  |  |
|--|--|

 . 

|  |
|--|
|  |
|--|

3a. Index enrollment date:

Date: 

|  |  |
|--|--|
|  |  |
|--|--|

|  |  |  |  |
|--|--|--|--|
|  |  |  |  |
|--|--|--|--|

|  |  |
|--|--|
|  |  |
|--|--|

*dd*                      *MMM*                      *yy*

This form is completed at Enrollment only.

**Item-specific Instructions:**

|                       |                                                                                                                                                                                                    |
|-----------------------|----------------------------------------------------------------------------------------------------------------------------------------------------------------------------------------------------|
| <b>Items 1 and 2</b>  | Document the participant's decision regarding enrollment specimen storage as documented on the enrollment consent form.                                                                            |
| <b>Items 3 and 3a</b> | For network partners that are enrolled after their index partners enrollment visit, indicate the index visit code at which the partner enrolled and enter the index participant's enrollment date. |



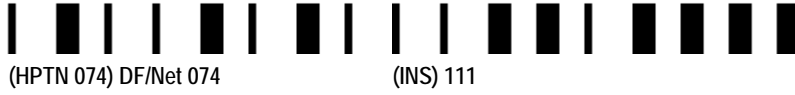

Visit Code:   .

Participant ID:

-      -  -

*Site Number      Network Number      Chk      Cohort*

Visit Date:

*dd      MMM      yy*

**Index Network Status**

|          |                                                                                                                                                              |                                                                |                                                                                                                                                                         |
|----------|--------------------------------------------------------------------------------------------------------------------------------------------------------------|----------------------------------------------------------------|-------------------------------------------------------------------------------------------------------------------------------------------------------------------------|
| <b>1</b> | How many total injection partners are listed on the Social/Sexual Network List?                                                                              | <input type="text"/> <input type="text"/> <input type="text"/> | <i># of partners</i>                                                                                                                                                    |
| <b>2</b> | How many new injection partners were added to the partner list as of this visit? By new, we mean they had not been in the list prior to this visit.          | <input type="text"/> <input type="text"/> <input type="text"/> | <i># of new partners</i>                                                                                                                                                |
| <b>3</b> | Is a new partner enrolling at this visit?                                                                                                                    | <input type="checkbox"/> Yes <input type="checkbox"/> No       | } <b>If both 3 and 3a are no, end of form.</b>                                                                                                                          |
| 3a.      | Does the index currently have an enrolled partner with whom they are currently (within the last month) sharing needles, water, cookers, etc?                 | <input type="checkbox"/> Yes <input type="checkbox"/> No       |                                                                                                                                                                         |
| <b>4</b> | List the enrolled partners with whom the participant has shared needles, water, cookers etc. in the last 3 months (include partners enrolled at this visit). |                                                                |                                                                                                                                                                         |
|          | <b>Partner's Initials or Nickname:</b>                                                                                                                       | <b>Participant ID:</b>                                         |                                                                                                                                                                         |
|          |                                                                                                                                                              | <i>Site Number</i>                                             | <i>Network Number</i> <i>Chk</i> <i>Cohort</i>                                                                                                                          |
| 4a.      | _____                                                                                                                                                        | <input type="text"/> <input type="text"/> <input type="text"/> | <input type="text"/> |
| 4b.      | _____                                                                                                                                                        | <input type="text"/> <input type="text"/> <input type="text"/> | <input type="text"/> |
| 4c.      | _____                                                                                                                                                        | <input type="text"/> <input type="text"/> <input type="text"/> | <input type="text"/> |
| 4d.      | _____                                                                                                                                                        | <input type="text"/> <input type="text"/> <input type="text"/> | <input type="text"/> |
| 4e.      | _____                                                                                                                                                        | <input type="text"/> <input type="text"/> <input type="text"/> | <input type="text"/> |
| 4f.      | _____                                                                                                                                                        | <input type="text"/> <input type="text"/> <input type="text"/> | <input type="text"/> |
| 4g.      | _____                                                                                                                                                        | <input type="text"/> <input type="text"/> <input type="text"/> | <input type="text"/> |
| 4h.      | _____                                                                                                                                                        | <input type="text"/> <input type="text"/> <input type="text"/> | <input type="text"/> |
| 4i.      | _____                                                                                                                                                        | <input type="text"/> <input type="text"/> <input type="text"/> | <input type="text"/> |

Comments (*Local Language*): \_\_\_\_\_

Comments (*English*): \_\_\_\_\_

This form is used to document new or returning network partners at follow-up visits.

The index may enroll additional network partners over the course of the study if the relationship and the partner meet protocol eligibility criteria. The index may end a relationship with a network partner, begin a relationship with a network partner or re-establish a relationship with a previous network partner. However, an index participant may only have up to 5 active network partners at any given time.

**Item-specific Instructions:**

|               |                                                                                                   |
|---------------|---------------------------------------------------------------------------------------------------|
| <b>Item 1</b> | If no partners are listed on the Social/Sexual Network List (non-CRF), enter 000.                 |
| <b>Item 2</b> | If no new partners were added, enter 000.                                                         |
| <b>Item 4</b> | Returning partners who had previously enrolled in the study maintain his/her original Partner ID. |

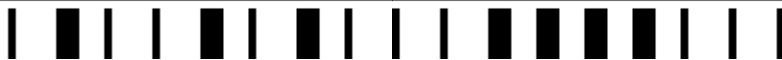

(HPTN 074) DF/Net 074

(FUV) 120

Visit Code:   .

Participant ID:

-     -  -

*Site Number      Network Number      Chk      Cohort*

Visit Date:   /     /

*dd      MMM      yy*

**Follow-up Visit**

**1** Is this an interim visit?  Yes  No → *If no, go to item 2.*

1a. Reason for interim visit. **Mark all that apply.**

- 1a1. Report a new AE(s)
- 1a2. Report a social impact
- 1a3. HIV testing
- 1a4. New injection partner
- 1a5. Repeat laboratory work
- 1a6. Other, specify:  
(Local language) \_\_\_\_\_  
(English) \_\_\_\_\_

1b. Besides this form, what other DataFax forms were completed at this visit? **Mark all that apply.**

- 1b1. Partner HIV Test Results
- 1b2. Index ART Initiation
- 1b3. Substance Use Treatment Initiation
- 1b4. Urine Drug Screen
- 1b5. Specimen Storage
- 1b6. CD4+/Viral Load Results
- 1b7. Adverse Experience Log (new)
- 1b8. Social Impact Log (new)
- 1b9. Other, specify:  
(Local language) \_\_\_\_\_  
(English) \_\_\_\_\_

**2** At this visit, how many new Adverse Experiences (AEs) have been reported?   → *Complete a separate AE Log page for each AE. If none, enter 00.*

**3** At this visit, how many new social impacts have been reported?   → *Complete a separate Social Impact Log page for each event. If none, enter 00.*

This form is used to summarize information from each participant follow-up study visit (including interim visits).

**Item-specific Instructions:**

|                   |                                                                                                                                                                                                                                                                                                                   |
|-------------------|-------------------------------------------------------------------------------------------------------------------------------------------------------------------------------------------------------------------------------------------------------------------------------------------------------------------|
| <b>Visit Code</b> | If this form is used for an interim visit, use an interim visit code. If it is used for a scheduled visit, use the visit code required for that visit. If this form is used for an interim visit, all other forms completed for this visit must have the same visit code as the one on this Follow-up Visit form. |
| <b>Item 1b</b>    | Mark the newly completed forms (in addition to this form) that are being submitted for the interim visit/contact. If "other, specify" is marked, record the form acronym(s) in the space provided.                                                                                                                |

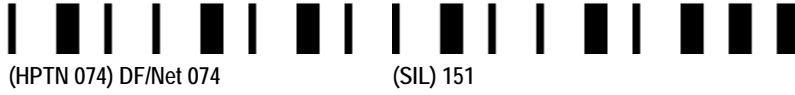

Participant ID:

|                      |                      |                      |                       |                      |                      |                      |                      |                      |                      |  |
|----------------------|----------------------|----------------------|-----------------------|----------------------|----------------------|----------------------|----------------------|----------------------|----------------------|--|
| <input type="text"/> | <input type="text"/> | <input type="text"/> | <input type="text"/>  | <input type="text"/> | <input type="text"/> | <input type="text"/> | <input type="text"/> | <input type="text"/> | <input type="text"/> |  |
| <i>Site Number</i>   |                      |                      | <i>Network Number</i> |                      |                      |                      | <i>Chk</i>           | <i>Cohort</i>        |                      |  |

### Social Impact Log

- 1 Concisely describe social impact: \_\_\_\_\_  
 \_\_\_\_\_  
 \_\_\_\_\_
- 2 Onset date:     
*dd MMM yy*
- 3 Reported at visit:  .
- 4 Social impact code:  → *See back for definitions of Social Impact Codes.*

Complete this form when recording the occurrence and resolution of adverse social impacts reported on scheduled Social Impact Assessment Questionnaire forms and those reported spontaneously at any time during the study.

Social impacts are events that the participant thinks are related to participation in this study.

**Item-specific Instructions:**

|               |                                                                                                                                                                                           |                                                                                                                                                                |
|---------------|-------------------------------------------------------------------------------------------------------------------------------------------------------------------------------------------|----------------------------------------------------------------------------------------------------------------------------------------------------------------|
| <b>Item 3</b> | If a participant reports a negative social impact outside of a regularly scheduled visit, complete this Log and the Interim Visit form. Record the same interim visit code on both forms. |                                                                                                                                                                |
| <b>Item 4</b> | Use the following definitions to code the social impact.                                                                                                                                  |                                                                                                                                                                |
|               | <b>Code</b>                                                                                                                                                                               | <b>Definition</b>                                                                                                                                              |
| <b>01</b>     | Personal Relationships                                                                                                                                                                    | Had negative experiences with family, friends, significant others, or sex partners.                                                                            |
| <b>02</b>     | Travel/Immigration                                                                                                                                                                        | Had problems obtaining formal permission to travel to or enter another country, such as being denied a visa, or had a problem with immigration/naturalization. |
| <b>03</b>     | Employment                                                                                                                                                                                | Been turned down for a new job, lost a job, or experienced other problems at work.                                                                             |
| <b>04</b>     | Education                                                                                                                                                                                 | Been turned down by an educational program, told to leave an educational program, or experienced other problems at school.                                     |
| <b>05</b>     | Medical/Dental                                                                                                                                                                            | Been refused medical or dental treatment, or treated negatively by a health care provider.                                                                     |
| <b>06</b>     | Health Insurance                                                                                                                                                                          | Lost health insurance, had a problem getting new health insurance, or experienced other problems related to health insurance.                                  |
| <b>07</b>     | Life Insurance                                                                                                                                                                            | Lost life insurance, had a problem getting new life insurance, or experienced other problems related to life insurance.                                        |
| <b>08</b>     | Housing                                                                                                                                                                                   | Had trouble getting or keeping housing, or had other problems related to housing.                                                                              |
| <b>09</b>     | Military/Other Government Agency                                                                                                                                                          | Had a problem with the military or any other government agencies.                                                                                              |
| <b>10</b>     | Other                                                                                                                                                                                     | Had other problems not covered in the codes above.                                                                                                             |

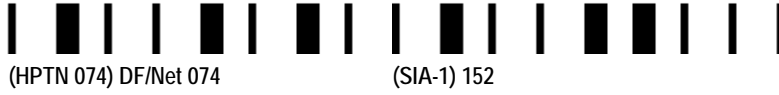

Visit Code:   .

Participant ID:

-     -  -

*Site Number      Network Number      Chk      Cohort*

Contact Date:

*dd      MMM      yy*

**Social Impact Assessment**

|          |                                                                                                                                   |                                                        |                             |                                                                                      |
|----------|-----------------------------------------------------------------------------------------------------------------------------------|--------------------------------------------------------|-----------------------------|--------------------------------------------------------------------------------------|
| <b>1</b> | Because of your participation in this study, did anything negative or bad happen to you that you have not reported to us already? | <input type="checkbox"/> Yes                           | <input type="checkbox"/> No | <b>→ If no, go to item 4.</b>                                                        |
| <b>2</b> | Because of your participation in this study, have you...                                                                          |                                                        |                             |                                                                                      |
|          | 2a. been arrested or had trouble with the police or other legal problems?                                                         | <input type="checkbox"/> Yes                           | <input type="checkbox"/> No | <b>→ If no, go to item 2b.</b>                                                       |
|          | 2a1. If yes how many times?                                                                                                       | <input type="text"/> <input type="text"/> # of times   |                             |                                                                                      |
|          | 2b. had trouble getting or keeping housing?                                                                                       | <input type="checkbox"/> Yes                           | <input type="checkbox"/> No | <b>→ If no, go to item 2c.</b>                                                       |
|          | 2b1. If yes how many times?                                                                                                       | <input type="text"/> <input type="text"/> # of times   |                             |                                                                                      |
|          | 2c. had trouble getting or keeping a job or trouble with income or economic support?                                              | <input type="checkbox"/> Yes                           | <input type="checkbox"/> No | <b>→ If no, go to item 2d.</b>                                                       |
|          | 2c1. If yes how many times?                                                                                                       | <input type="text"/> <input type="text"/> # of times   |                             |                                                                                      |
|          | 2d. had trouble getting health care or with health insurance?                                                                     | <input type="checkbox"/> Yes                           | <input type="checkbox"/> No | <b>→ If no, go to item 2e.</b>                                                       |
|          | 2d1. If yes how many times?                                                                                                       | <input type="text"/> <input type="text"/> # of times   |                             |                                                                                      |
|          | 2e. had personal trouble with friends, family, or acquaintances?                                                                  | <input type="checkbox"/> Yes                           | <input type="checkbox"/> No | <b>→ If no, go to item 2f.</b>                                                       |
|          | 2e1. If yes how many times?                                                                                                       | <input type="text"/> <input type="text"/> # of times   |                             |                                                                                      |
|          | 2f. had any other type of problem?                                                                                                | <input type="checkbox"/> Yes,<br><i>specify:</i>       | <input type="checkbox"/> No | <b>→ If no, go to item 3.</b>                                                        |
|          | <i>Local language:</i> _____                                                                                                      | <i>English:</i> _____                                  |                             |                                                                                      |
| <b>3</b> | Indicate the total number of impacts:                                                                                             | <input type="text"/> <input type="text"/> # of impacts |                             | <i>Complete a separate Social Impact Log (SIL) for each impact.</i>                  |
| <b>4</b> | Has your participation in this study had any positive or beneficial impact on your life?                                          | <input type="checkbox"/> Yes                           | <input type="checkbox"/> No | <input type="checkbox"/> Don't know<br><i>If no, end of form. Do not fax page 2.</i> |

Complete this form when documenting information on any social impact, whether positive or negative, that a participant experiences as a result of being in this HIV prevention trial.

Adverse social impacts associated with study participation must be reported and followed until their resolution using the Social Impact Log. Only report new experiences on this form that have not already been documented on a Social Impact Log. Worsening or continuation of a situation previously reported is not considered a “new” experience.

**Item-specific Instructions:**

|                  |                                                                                                                                                                                                                                                                                                                                                                                                                                                                                                                                                                                                                                                                                                                                                                                                                       |
|------------------|-----------------------------------------------------------------------------------------------------------------------------------------------------------------------------------------------------------------------------------------------------------------------------------------------------------------------------------------------------------------------------------------------------------------------------------------------------------------------------------------------------------------------------------------------------------------------------------------------------------------------------------------------------------------------------------------------------------------------------------------------------------------------------------------------------------------------|
| <b>Items 1-3</b> | <p>Read all sub-items to the participant and mark a response for each. If the participant refuses any, write “refused” and line through the response box.</p> <ul style="list-style-type: none"> <li>• If the participant answers “yes” to any responses in item 2, a Social Impact Log page must be completed.</li> <li>• Total the number of social impacts reported and enter the number in the boxes labeled “total number of impacts.” Complete one Social Impact Log page for each impact reported.</li> <li>• If two separate occurrences of the same type of social impact are reported, (e.g., two separate episodes of personal relationship problems), mark the “yes” box for that social impact, and include both episodes in the total. Complete one Social Impact Log page for each episode.</li> </ul> |
| <b>Item 4</b>    | A “beneficial” impact means anything good or that has improved the participant’s quality of life.                                                                                                                                                                                                                                                                                                                                                                                                                                                                                                                                                                                                                                                                                                                     |



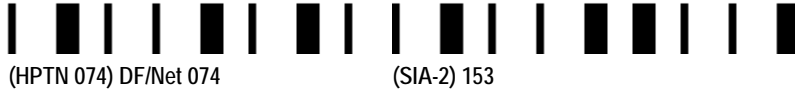

Visit Code:   .

Participant ID:

-      -  -

*Site Number*      *Network Number*      *Chk*      *Cohort*

**Social Impact Assessment**

| 5   | Because of your participation in this study, have you experienced... | <i>Yes</i>               | <i>No</i>                |
|-----|----------------------------------------------------------------------|--------------------------|--------------------------|
| 5a. | Employment improvement?                                              | <input type="checkbox"/> | <input type="checkbox"/> |
| 5b. | Financial improvement?                                               | <input type="checkbox"/> | <input type="checkbox"/> |
| 5c. | Reduction in drug use?                                               | <input type="checkbox"/> | <input type="checkbox"/> |
| 5d. | Reduction in cravings/withdrawal?                                    | <input type="checkbox"/> | <input type="checkbox"/> |
| 5e. | Gained knowledge?                                                    | <input type="checkbox"/> | <input type="checkbox"/> |
| 5f. | Life improvement?                                                    | <input type="checkbox"/> | <input type="checkbox"/> |
| 5g. | Physical health improvement?                                         | <input type="checkbox"/> | <input type="checkbox"/> |
| 5h. | Improved relationships?                                              | <input type="checkbox"/> | <input type="checkbox"/> |
| 5i. | Reduced stigma?                                                      | <input type="checkbox"/> | <input type="checkbox"/> |
| 5j. | Improved mental health?                                              | <input type="checkbox"/> | <input type="checkbox"/> |
| 5k. | Other, specify:                                                      | <input type="checkbox"/> | <input type="checkbox"/> |

*Local language:* \_\_\_\_\_

*English:* \_\_\_\_\_

Complete this form when documenting information on any social impact, whether positive or negative, that a participant experiences as a result of being in this HIV prevention trial.

Adverse social impacts associated with study participation must be reported and followed until their resolution using the Social Impact Log. Only report new experiences on this form that have not already been documented on a Social Impact Log. Worsening or continuation of a situation previously reported is not considered a “new” experience.

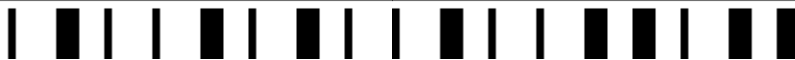

(HPTN 074) DF/Net 074

(STG-1) 155

Visit Code:   .

Participant ID:

-     -  -

*Site Number      Network Number      Chk      Cohort*

Contact Date:   /     /

*dd      MMM      yy*

**Social Support and Stigma Questionnaire**

*In this section, I am going to read you statements about how you may feel about yourself, your injection drug use, and your HIV/AIDS infection. I would like you to tell me if you agree strongly, agree, disagree, or disagree strongly with each statement.*

**INTERNALIZED STIGMA AND SHAME**

|          |                                                        | <i>Agree strongly</i>    | <i>Agree</i>             | <i>Disagree</i>          | <i>Disagree strongly</i> |
|----------|--------------------------------------------------------|--------------------------|--------------------------|--------------------------|--------------------------|
| <b>1</b> | I think less of myself or I have felt ashamed because: |                          |                          |                          |                          |
|          | 1a. I inject drugs.                                    | <input type="checkbox"/> | <input type="checkbox"/> | <input type="checkbox"/> | <input type="checkbox"/> |
|          | 1b. I am living with HIV.                              | <input type="checkbox"/> | <input type="checkbox"/> | <input type="checkbox"/> | <input type="checkbox"/> |

**EXPERIENCED STIGMA**

|          |                                                | <i>Agree strongly</i>    | <i>Agree</i>             | <i>Disagree</i>          | <i>Disagree strongly</i> |
|----------|------------------------------------------------|--------------------------|--------------------------|--------------------------|--------------------------|
| <b>2</b> | I have become isolated from my family because: |                          |                          |                          |                          |
|          | 2a. I inject drugs.                            | <input type="checkbox"/> | <input type="checkbox"/> | <input type="checkbox"/> | <input type="checkbox"/> |
|          | 2b. I am living with HIV.                      | <input type="checkbox"/> | <input type="checkbox"/> | <input type="checkbox"/> | <input type="checkbox"/> |

**ANTICIPATED STIGMA**

|          |                                                                                                            | <i>Agree strongly</i>    | <i>Agree</i>             | <i>Disagree</i>          | <i>Disagree strongly</i> |
|----------|------------------------------------------------------------------------------------------------------------|--------------------------|--------------------------|--------------------------|--------------------------|
| <b>3</b> | I fear that if I disclosed my HIV status to my family, they would exclude me from usual family activities. | <input type="checkbox"/> | <input type="checkbox"/> | <input type="checkbox"/> | <input type="checkbox"/> |
| <b>4</b> | I fear that if I disclosed my HIV status to others, I would find it hard to find work.                     | <input type="checkbox"/> | <input type="checkbox"/> | <input type="checkbox"/> | <input type="checkbox"/> |
| <b>5</b> | I fear that if I go to an MMT or buprenorphine clinic to treat my substance use I will be treated poorly.  | <input type="checkbox"/> | <input type="checkbox"/> | <input type="checkbox"/> | <input type="checkbox"/> |
| <b>6</b> | I fear that if I go to an HIV clinic I will be treated poorly because I inject drugs.                      | <input type="checkbox"/> | <input type="checkbox"/> | <input type="checkbox"/> | <input type="checkbox"/> |
| <b>7</b> | I do not feel comfortable talking to health care providers as I feel they would judge me.                  | <input type="checkbox"/> | <input type="checkbox"/> | <input type="checkbox"/> | <input type="checkbox"/> |

*No instructions necessary.*

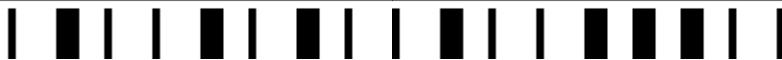

(HPTN 074) DF/Net 074

(STG-2) 156

Visit Code:   .

Participant ID:

-      -  -

*Site Number      Network Number      Chk      Cohort*

**Social Support and Stigma Questionnaire**

|          |                                                                                                                                                                       | <i>Not at all</i>        | <i>Several days</i>      | <i>More than half of the days</i> | <i>Nearly every day</i>  |
|----------|-----------------------------------------------------------------------------------------------------------------------------------------------------------------------|--------------------------|--------------------------|-----------------------------------|--------------------------|
| <b>8</b> | Over the last 2 weeks, how often have you been bothered by any of the following problems?                                                                             |                          |                          |                                   |                          |
|          | 8a. Little interest or pleasure in doing things                                                                                                                       | <input type="checkbox"/> | <input type="checkbox"/> | <input type="checkbox"/>          | <input type="checkbox"/> |
|          | 8b. Feeling down, depressed or hopeless                                                                                                                               | <input type="checkbox"/> | <input type="checkbox"/> | <input type="checkbox"/>          | <input type="checkbox"/> |
|          | 8c. Trouble falling or staying asleep or sleeping too much                                                                                                            | <input type="checkbox"/> | <input type="checkbox"/> | <input type="checkbox"/>          | <input type="checkbox"/> |
|          | 8d. Feeling tired or having little energy                                                                                                                             | <input type="checkbox"/> | <input type="checkbox"/> | <input type="checkbox"/>          | <input type="checkbox"/> |
|          | 8e. Poor appetite or overeating                                                                                                                                       | <input type="checkbox"/> | <input type="checkbox"/> | <input type="checkbox"/>          | <input type="checkbox"/> |
|          | 8f. Feeling bad about yourself—or that you are a failure or have let yourself or your family down                                                                     | <input type="checkbox"/> | <input type="checkbox"/> | <input type="checkbox"/>          | <input type="checkbox"/> |
|          | 8g. Trouble concentrating on things, such as reading the newspaper or watching television                                                                             | <input type="checkbox"/> | <input type="checkbox"/> | <input type="checkbox"/>          | <input type="checkbox"/> |
|          | 8h. Moving or speaking so slowly that other people have noticed; or the opposite—being so fidgety or restless that you have to be moving around a lot more than usual | <input type="checkbox"/> | <input type="checkbox"/> | <input type="checkbox"/>          | <input type="checkbox"/> |
|          | 8i. Thoughts that you would be better off dead or of hurting yourself in some way                                                                                     | <input type="checkbox"/> | <input type="checkbox"/> | <input type="checkbox"/>          | <input type="checkbox"/> |

|          |                                                                                                                                                                                                         |
|----------|---------------------------------------------------------------------------------------------------------------------------------------------------------------------------------------------------------|
| <b>9</b> | People sometimes look to others for companionship, assistance, or other types of support. Please tell me how often each of the following kinds of support are available to you if you need them.        |
|          | 9a. Someone to have a good time with:                                                                                                                                                                   |
|          | <input type="checkbox"/> <i>None of the time</i> <input type="checkbox"/> <i>A little of the time</i> <input type="checkbox"/> <i>Some of the time</i> <input type="checkbox"/> <i>Most of the time</i> |
|          | 9b. Someone to get together with for relaxation:                                                                                                                                                        |
|          | <input type="checkbox"/> <i>None of the time</i> <input type="checkbox"/> <i>A little of the time</i> <input type="checkbox"/> <i>Some of the time</i> <input type="checkbox"/> <i>Most of the time</i> |
|          | 9c. Someone to do something enjoyable with:                                                                                                                                                             |
|          | <input type="checkbox"/> <i>None of the time</i> <input type="checkbox"/> <i>A little of the time</i> <input type="checkbox"/> <i>Some of the time</i> <input type="checkbox"/> <i>Most of the time</i> |

*No instructions necessary.*

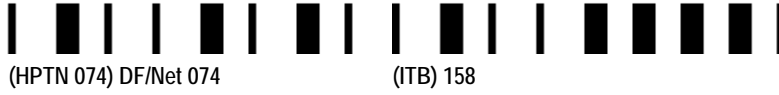

Visit Code:   .

Participant ID:

-     -  -

*Site Number      Network Number      Chk      Cohort*

Contact Date:

*dd      MMM      yy*

**Index Treatment Belief Questionnaire**

|           |                                                                                                                                                                                                                                                    | <i>Agree strongly</i>               | <i>Agree</i>                       | <i>Disagree</i>          | <i>Disagree strongly</i> |            |
|-----------|----------------------------------------------------------------------------------------------------------------------------------------------------------------------------------------------------------------------------------------------------|-------------------------------------|------------------------------------|--------------------------|--------------------------|------------|
| <b>1</b>  | If you have side effects, you should continue to take your HIV treatment.                                                                                                                                                                          | <input type="checkbox"/>            | <input type="checkbox"/>           | <input type="checkbox"/> | <input type="checkbox"/> |            |
| <b>2</b>  | HIV treatment is safe.                                                                                                                                                                                                                             | <input type="checkbox"/>            | <input type="checkbox"/>           | <input type="checkbox"/> | <input type="checkbox"/> |            |
| <b>3</b>  | HIV treatment is effective (by effective we mean, does it work).                                                                                                                                                                                   | <input type="checkbox"/>            | <input type="checkbox"/>           | <input type="checkbox"/> | <input type="checkbox"/> |            |
| <b>4</b>  | If you miss your medication one day, what should you do?<br><br><input type="checkbox"/> <i>Take double dose</i> <input type="checkbox"/> <i>Take regular dose</i> <input type="checkbox"/> <i>Take one and half doses</i>                         |                                     |                                    |                          |                          |            |
| <b>5</b>  | In the past 3 months, have you set personal goals for your HIV treatment?                                                                                                                                                                          | <input type="checkbox"/> <i>Yes</i> | <input type="checkbox"/> <i>No</i> |                          |                          |            |
| <b>6</b>  | In the past 3 months, have you asked questions to your medical provider about your HIV?                                                                                                                                                            | <input type="checkbox"/> <i>Yes</i> | <input type="checkbox"/> <i>No</i> |                          |                          |            |
|           |                                                                                                                                                                                                                                                    | <i>Agree strongly</i>               | <i>Agree</i>                       | <i>Disagree</i>          | <i>Disagree strongly</i> |            |
| <b>7</b>  | If you have side effects, you should continue to take your substance use treatment.                                                                                                                                                                | <input type="checkbox"/>            | <input type="checkbox"/>           | <input type="checkbox"/> | <input type="checkbox"/> |            |
| <b>8</b>  | Substitution therapy (site specific, only ask if available) therapy is safe.                                                                                                                                                                       | <input type="checkbox"/>            | <input type="checkbox"/>           | <input type="checkbox"/> | <input type="checkbox"/> | <i>N/A</i> |
| <b>9</b>  | Substance use treatment is effective (by effective we mean, does it work).                                                                                                                                                                         | <input type="checkbox"/>            | <input type="checkbox"/>           | <input type="checkbox"/> | <input type="checkbox"/> |            |
| <b>10</b> | If you miss your substance use treatment medication one day, what should you do?<br><br><input type="checkbox"/> <i>Take double dose</i> <input type="checkbox"/> <i>Take regular dose</i> <input type="checkbox"/> <i>Take one and half doses</i> |                                     |                                    |                          |                          |            |

Version 1.0, 21-JAN-15

English

Completed by: \_\_\_\_\_ *(initials/date)*

**Item-specific Instructions:**

|               |                                                                 |
|---------------|-----------------------------------------------------------------|
| <b>Item 8</b> | If substitution therapy is not available at the site, mark N/A. |
|---------------|-----------------------------------------------------------------|



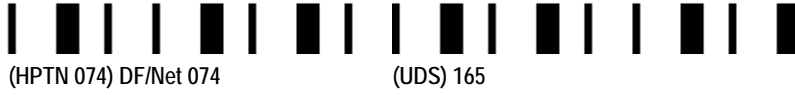

Visit Code:   .

Participant ID:

-     -  -

*Site Number Participant Number Chk Cohort*

Specimen Collection Date:

*dd MMM yy*

**Urine Drug Screen**

*Not done/Not collected* → *End of form.*

| 1   | Was drug detected?            | <i>Yes</i>               | <i>No</i>                | <i>Not done/<br/>Not collected</i> |
|-----|-------------------------------|--------------------------|--------------------------|------------------------------------|
| 1a. | Amphetamines                  | <input type="checkbox"/> | <input type="checkbox"/> | <input type="checkbox"/>           |
| 1b. | Methamphetamines              | <input type="checkbox"/> | <input type="checkbox"/> | <input type="checkbox"/>           |
| 1c. | Methadone                     | <input type="checkbox"/> | <input type="checkbox"/> | <input type="checkbox"/>           |
| 1d. | Opiates/morphine              | <input type="checkbox"/> | <input type="checkbox"/> | <input type="checkbox"/>           |
| 1e. | Benzodiazepines               | <input type="checkbox"/> | <input type="checkbox"/> | <input type="checkbox"/>           |
| 1f. | Buprenorphine                 | <input type="checkbox"/> | <input type="checkbox"/> | <input type="checkbox"/>           |
| 1g. | Cannabinoids                  | <input type="checkbox"/> | <input type="checkbox"/> | <input type="checkbox"/>           |
| 1h. | Cocaine metabolite            | <input type="checkbox"/> | <input type="checkbox"/> | <input type="checkbox"/>           |
| 1i. | Other, specify:               | <input type="checkbox"/> | <input type="checkbox"/> |                                    |
|     | <i>(Local language)</i> _____ |                          |                          |                                    |
|     | <i>(English)</i> _____        |                          |                          |                                    |

Comments *(Local language)*: \_\_\_\_\_

Comments *(English)*: \_\_\_\_\_

Results from tests performed on urine samples (drug screening) are recorded on this form.

**Item-specific Instructions:**

|                                 |                                                                                                                                                           |
|---------------------------------|-----------------------------------------------------------------------------------------------------------------------------------------------------------|
| <b>Specimen Collection Date</b> | Record the date that the specimen was collected (not the date results were reported or recorded on the form) for this visit. A complete date is required. |
| <b>Not done/Not collected</b>   | If the urine sample was not collected (e.g. the participant refused or forgot), mark "Not done/Not collected", then end of form.                          |

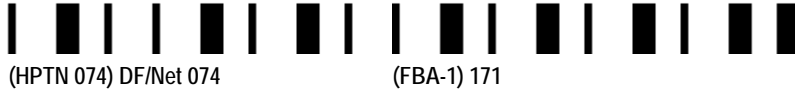

Visit Code:   .

Participant ID:

-     -  -

*Site Number      Network Number      Chk      Cohort*

Assessment Date:

*dd      MMM      yy*

**Follow-up Behavior Assessment**

*A broad range of participants are taking part in this study. So some questions may not apply to you. We ask the same questions of all participants.*

*In this interview, you will be asked about your sexual behaviors and possible alcohol and drug use. Some of the questions may seem very personal. Please remember that all of your answers will be kept private. Your responses are linked only to your study number, not to your name.*

*We need you to answer these questions honestly. We do not judge about alcohol or drug use. We make no judgments about how you have sex or the number of times or with whom.*

*These questions help us understand the type of behaviors our participants are doing while on study. Your honesty will help us understand these differences in behaviors.*

**FOLLOW-UP DEMOGRAPHICS**

**1** How would you describe your current living situation? *Mark all that apply.*

- 1a. Live in a house that I own or rent
- 1b. Live in parent's home
- 1c. Live in other relative's home (e.g. sibling, cousin, aunt and/or uncle)
- 1d. Rent a room or space in someone else's house or apartment
- 1e. Stay with someone else for free (don't pay regular room and board)
- 1f. Live on the street, in a park, alley or abandoned building
- 1g. Live in a homeless shelter
- 1h. Stay at more than two different places a week
- 1i. Live in a drug recovery or any transitional house
- 1j. Other place, specify:  
     Local language: \_\_\_\_\_  
     English: \_\_\_\_\_
- 1k. Refuse to answer

This assessment documents information on a participant's behaviors. These questions ask the participant to provide sensitive information. To increase honest and accurate responses it is important to demonstrate that all information will be kept private and confidential.

This is an interviewer-administered form.

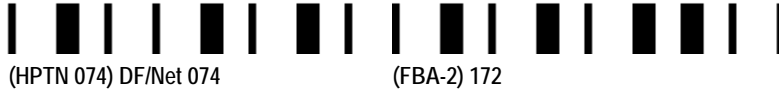

Visit Code:   .

Participant ID:

|                      |                      |                      |                      |                      |                      |                      |                      |                      |                      |  |
|----------------------|----------------------|----------------------|----------------------|----------------------|----------------------|----------------------|----------------------|----------------------|----------------------|--|
| <input type="text"/> | <input type="text"/> | <input type="text"/> | <input type="text"/> | <input type="text"/> | <input type="text"/> | <input type="text"/> | <input type="text"/> | <input type="text"/> | <input type="text"/> |  |
| Site Number          |                      |                      | Network Number       |                      |                      |                      | Chk                  | Cohort               |                      |  |

**Follow-up Behavior Assessment**

**2** Who lives with you? *Mark all that apply.*

- 2a. Spouse/partner/girl-boyfriend
- 2b. Own children
- 2c. Parents
- 2d. Other family members
- 2e. Friends
- 2f. Others (e.g., roommates, tenants)
- 2g. Live alone
- 2h. Refuse to answer

**3** What is your relationship status? Are you:

- Married
- Living with a sexual partner but not married
- Separated
- Divorced
- Widowed
- Single
- Refuse to answer

**4** At any time during the last 3 months, that is from today, have you been unemployed?

- Yes
- No
- Refuse to answer

This assessment documents information on a participant's behaviors. These questions ask the participant to provide sensitive information. To increase honest and accurate responses it is important to demonstrate that all information will be kept private and confidential. Answer these questions to reflect your behavior for the past 3 months.

This is an interviewer-administered form.

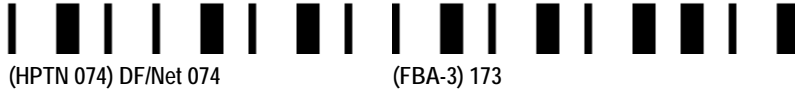

Visit Code:   .

Participant ID:

-      -  -

*Site Number      Network Number      Chk      Cohort*

**Follow-up Behavior Assessment**

**5** Which of the following best describes your current employment status? Are you:

- Employed full-time*
- Employed part-time*
- Unemployed but seeking work*
- Unemployed—not seeking work*
- Retired*
- Refuse to answer*

**6** In the past month, how many days have you been working for pay?   # days

**7** (*Index: Intervention ONLY*) Do you have a designated support person?  Yes  No → *If no, go to item 8.*

7a. What is the relationship of the support person to you?

- Spouse/partner/girl-boyfriend*
- Father/mother*
- Sibling*
- Other family member*
- Friend*
- Other, specify:*

*Local language:* \_\_\_\_\_

*English:* \_\_\_\_\_

**INCARCERATION**

**8** In the last 3 months, how many different times were you in...

8a. Jail/prison?   # of times

8b. Involuntary detoxification/detention?   # of times

8c. Other incarceration, specify:   # of times

*Local language:* \_\_\_\_\_ *English:* \_\_\_\_\_

This assessment documents information on a participant's behaviors. These questions ask the participant to provide sensitive information. To increase honest and accurate responses it is important to demonstrate that all information will be kept private and confidential. Answer these questions to reflect your behavior for the past 3 months.

This is an interviewer-administered form.



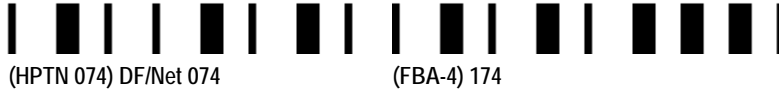

Visit Code:   .

Participant ID:

-     -  -

*Site Number      Network Number      Chk      Cohort*

**Follow-up Behavior Assessment**

**ALCOHOL USE (Audit C)** *Answer questions to reflect your behavior over the past 3 months.*

**9** How often do you have a drink containing alcohol?

*Never*      **→** *If never, go to item 12.*       *2-3 times a week*

*Monthly or less*       *4 or more times a week*

*2-4 times a month*

**10** How many standard drinks containing alcohol do you have on a typical day?

*1 or 2*       *7 to 9*

*3 or 4*       *10 or more*

*5 or 6*

**11** How often do you have six or more drinks on one occasion?

*Never*       *Weekly*

*Less than monthly*       *Daily or almost daily*

*Monthly*

**NON-INJECTION DRUG USE**

**12** In the last 3 months, did you...      *Yes*      *No*

12a. Use marijuana?           

12b. Use stimulants (cocaine, methamphetamines)?           

12c. Use opiates (heroin, opium)?           

12d. Use other drugs (*as indicated by sites*), specify:           

*Local language:* \_\_\_\_\_

*English:* \_\_\_\_\_

**13** When was the last time you used marijuana, amphetamines, methadone, opiates or benzodiazepines that you did not inject?              OR  *Never*

*dd      MMM      yy*

This assessment documents information on a participant's behaviors. These questions ask the participant to provide sensitive information. To increase honest and accurate responses it is important to demonstrate that all information will be kept private and confidential.

This is an interviewer-administered form.

**Item-specific Instructions:**

|                 |                                                                                                                                                                                                           |
|-----------------|-----------------------------------------------------------------------------------------------------------------------------------------------------------------------------------------------------------|
| <b>Item 12</b>  | If appropriate, use local or street name of the drug.                                                                                                                                                     |
| <b>Item 12d</b> | Record any non-injected use of the drugs indicated (smoke, ingest, sniff, etc.).                                                                                                                          |
| <b>Item 13</b>  | When possible record the complete date (day, month, and year). If the exact date is unknown, record month and year. If the participant has never used these drugs in a non-injected method, mark "never." |

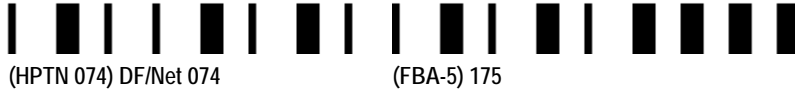

Visit Code:   .

Participant ID:

-     -  -

*Site Number      Network Number      Chk      Cohort*

**Follow-up Behavior Assessment**

**INJECTION DRUG USE**

**14** In the last 3 months, did you use a needle to inject any drugs under your skin or into a vein?  Yes  No → *If no, go to item 33 on page 8.*

**15** In the last 3 months, which of the following did you inject?

|                       | <i>Yes</i>               | <i>No</i>                |                                       | <i>Yes</i>               | <i>No</i>                |
|-----------------------|--------------------------|--------------------------|---------------------------------------|--------------------------|--------------------------|
| 15a. Amphetamines     | <input type="checkbox"/> | <input type="checkbox"/> | 15i. Ketamine                         | <input type="checkbox"/> | <input type="checkbox"/> |
| 15b. Methamphetamines | <input type="checkbox"/> | <input type="checkbox"/> | 15j. Homemade opioids                 | <input type="checkbox"/> | <input type="checkbox"/> |
| 15c. Cocaine          | <input type="checkbox"/> | <input type="checkbox"/> | 15k. Short and long action stimulants | <input type="checkbox"/> | <input type="checkbox"/> |
| 15d. Heroin           | <input type="checkbox"/> | <input type="checkbox"/> | 15l. Dezomorphine                     | <input type="checkbox"/> | <input type="checkbox"/> |
| 15e. Opium            | <input type="checkbox"/> | <input type="checkbox"/> | 15m. Other, specify:                  | <input type="checkbox"/> | <input type="checkbox"/> |
| 15f. Buprenorphine    | <input type="checkbox"/> | <input type="checkbox"/> | <i>Local language:</i> _____          |                          |                          |
| 15g. Methadone        | <input type="checkbox"/> | <input type="checkbox"/> | <i>English:</i> _____                 |                          |                          |
| 15h. Benzodiazepines  | <input type="checkbox"/> | <input type="checkbox"/> |                                       |                          |                          |

**16** In the last month, on how many days did you inject drugs?   *# of days*

**17** In the last month, on days that you injected, how many times a day did you usually inject drugs?   *# of times a day*

**18** When was the last day you injected (including today)?   *dd*    *MMM*   *yy* OR   *# of months ago*

This assessment documents information on a participant's behaviors. These questions ask the participant to provide sensitive information. To increase honest and accurate responses it is important to demonstrate that all information will be kept private and confidential.

This is an interviewer-administered form.

**Item-specific Instructions:**

|                 |                                                                                                                     |
|-----------------|---------------------------------------------------------------------------------------------------------------------|
| <b>Item 15m</b> | If appropriate, use local or street name of the drug. Only record the names of drugs not already marked in 15a–15l. |
| <b>Item 18</b>  | When possible record the complete date (day, month, and year). If the exact date is unknown, record month and year. |

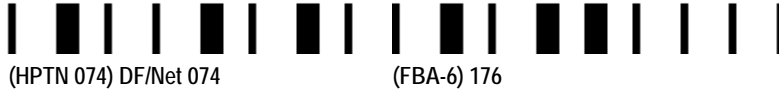

Visit Code:

No data recorded on this page

Participant ID:

-      -  -

*Site Number      Network Number      Chk      Cohort*

**Follow-up Behavior Assessment**

**SHARING**

*Often people share syringes and other equipment because they are in a rush, they are concerned about the police, feeling sick or for a variety of other reasons.*

|           |                                                                    | Yes                      | No                       | Don't know               |
|-----------|--------------------------------------------------------------------|--------------------------|--------------------------|--------------------------|
| <b>19</b> | Have you shared rinse water in the last 3 months?                  | <input type="checkbox"/> | <input type="checkbox"/> | <input type="checkbox"/> |
|           | 19a. The last time you injected, did you share rinse water?        | <input type="checkbox"/> | <input type="checkbox"/> | <input type="checkbox"/> |
| <b>20</b> | Have you shared a cooker/container in the last 3 months?           | <input type="checkbox"/> | <input type="checkbox"/> | <input type="checkbox"/> |
|           | 20a. The last time you injected, did you share a cooker/container? | <input type="checkbox"/> | <input type="checkbox"/> | <input type="checkbox"/> |
| <b>21</b> | Have you shared filter cotton in the last 3 months?                | <input type="checkbox"/> | <input type="checkbox"/> | <input type="checkbox"/> |
|           | 21a. The last time you injected, did you share filter cotton?      | <input type="checkbox"/> | <input type="checkbox"/> | <input type="checkbox"/> |

*If no, go to item 20.*      *If no, go to item 21.*      *If no, go to item 22.*

**CLEANING**

|           |                                                                                |                                                                                                                                                                                              |                          |                          |  |
|-----------|--------------------------------------------------------------------------------|----------------------------------------------------------------------------------------------------------------------------------------------------------------------------------------------|--------------------------|--------------------------|--|
| <b>22</b> | How often do you clean your needle before injecting?                           | <input type="checkbox"/> <i>Always</i> <input type="checkbox"/> <i>More than half the time</i> <input type="checkbox"/> <i>Less than half the time</i> <input type="checkbox"/> <i>Never</i> |                          |                          |  |
|           | 22a. The last time you injected, did you clean the needle before you injected? | Yes                                                                                                                                                                                          | No                       | Don't know               |  |
|           | 22b. The last time you injected, did you use a new needle?                     | <input type="checkbox"/>                                                                                                                                                                     | <input type="checkbox"/> | <input type="checkbox"/> |  |
|           | 22c. How often do you clean your needle after injecting?                       | <input type="checkbox"/> <i>Always</i> <input type="checkbox"/> <i>More than half the time</i> <input type="checkbox"/> <i>Less than half the time</i> <input type="checkbox"/> <i>Never</i> |                          |                          |  |
|           | 22d. The last time you injected, did you clean the needle after you injected?  | Yes                                                                                                                                                                                          | No                       | Don't know               |  |
|           |                                                                                | <input type="checkbox"/>                                                                                                                                                                     | <input type="checkbox"/> | <input type="checkbox"/> |  |

This assessment documents information on a participant's behaviors. These questions ask the participant to provide sensitive information. To increase honest and accurate responses it is important to demonstrate that all information will be kept private and confidential.

This is an interviewer-administered form.

**Item-specific Instructions:**

|                                      |                                                                                                                           |
|--------------------------------------|---------------------------------------------------------------------------------------------------------------------------|
| <b>No data recorded on this page</b> | Mark this box if no data is recorded on this page other than the Participant ID, Visit Code, and the Staff Initials/Date. |
|--------------------------------------|---------------------------------------------------------------------------------------------------------------------------|

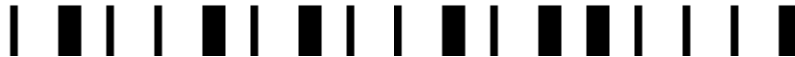

(HPTN 074) DF/Net 074

(FBA-7) 177

Visit Code:

No data recorded on this page

Participant ID:

-      -  -

*Site Number      Network Number      Chk      Cohort*

**Follow-up Behavior Assessment**

**PRE-FILLING AND BACKLOADING SYRINGES**

|           |                                                                                                                                                                                                                                                                                                                                                                                                                                                                                                                                                                                                                                                                                                                                                                    |                                                                                                                                                                                                                                                                                    |                             |                                     |
|-----------|--------------------------------------------------------------------------------------------------------------------------------------------------------------------------------------------------------------------------------------------------------------------------------------------------------------------------------------------------------------------------------------------------------------------------------------------------------------------------------------------------------------------------------------------------------------------------------------------------------------------------------------------------------------------------------------------------------------------------------------------------------------------|------------------------------------------------------------------------------------------------------------------------------------------------------------------------------------------------------------------------------------------------------------------------------------|-----------------------------|-------------------------------------|
| <b>23</b> | The last time you injected, did you use a pre-filled syringe?                                                                                                                                                                                                                                                                                                                                                                                                                                                                                                                                                                                                                                                                                                      | <input type="checkbox"/> Yes                                                                                                                                                                                                                                                       | <input type="checkbox"/> No | <input type="checkbox"/> Don't know |
| <b>24</b> | The last time you injected, did you inject drugs that were frontloaded or backloaded into the syringe or needle that you used?                                                                                                                                                                                                                                                                                                                                                                                                                                                                                                                                                                                                                                     | <input type="checkbox"/> Yes                                                                                                                                                                                                                                                       | <input type="checkbox"/> No | <input type="checkbox"/> Don't know |
| <b>25</b> | In the last 3 months, how many different people did you use injection drugs with?                                                                                                                                                                                                                                                                                                                                                                                                                                                                                                                                                                                                                                                                                  | <input type="text"/> <input type="text"/> <input type="text"/>                                                                                                                                                                                                                     | <i># of people</i>          | → <i>If 000, go to item 31.</i>     |
| <b>26</b> | In the last 3 months, how many times did you even once pass on a needle or syringe to someone else after you used it?                                                                                                                                                                                                                                                                                                                                                                                                                                                                                                                                                                                                                                              | <input type="text"/> <input type="text"/> <input type="text"/>                                                                                                                                                                                                                     | <i># of times</i>           | → <i>If 000, go to item 28.</i>     |
| <b>27</b> | In the last 3 months, with how many different people did you pass on a needle or syringe after you had used it?                                                                                                                                                                                                                                                                                                                                                                                                                                                                                                                                                                                                                                                    | <input type="text"/> <input type="text"/> <input type="text"/>                                                                                                                                                                                                                     | <i># of people</i>          |                                     |
| <b>28</b> | In the last 3 months, how many times did you ever, even once, use a needle or syringe after someone else used it?                                                                                                                                                                                                                                                                                                                                                                                                                                                                                                                                                                                                                                                  | <input type="text"/> <input type="text"/> <input type="text"/>                                                                                                                                                                                                                     | <i># of times</i>           | → <i>If 000, go to item 30.</i>     |
| <b>29</b> | In the last 3 months, with how many different people did you use a needle or syringe after someone else used it?                                                                                                                                                                                                                                                                                                                                                                                                                                                                                                                                                                                                                                                   | <input type="text"/> <input type="text"/> <input type="text"/>                                                                                                                                                                                                                     | <i># of people</i>          |                                     |
| <b>30</b> | In the past 3 months, when you shared syringes, how often did you inject last?                                                                                                                                                                                                                                                                                                                                                                                                                                                                                                                                                                                                                                                                                     | <input type="checkbox"/> <i>Always</i> <input type="checkbox"/> <i>Most times</i> <input type="checkbox"/> <i>Sometimes</i><br><input type="checkbox"/> <i>Rarely</i> <input type="checkbox"/> <i>Never</i> <input type="checkbox"/> <i>I have not shared in the past 3 months</i> |                             |                                     |
| <b>31</b> | In the last 3 months, did you get your new needles/syringes from a...<br><br>31a. <input type="checkbox"/> <i>I did not get new needles in the last 3 months</i> → <i>Go to item 33 on page 8.</i><br><div style="display: flex; justify-content: space-around; width: 100%;"> <span>Yes</span> <span>No</span> </div> 31b. Pharmacy or health center? <input type="checkbox"/> <input type="checkbox"/><br>31c. Needle seller? <input type="checkbox"/> <input type="checkbox"/><br>31d. Needle exchange? <input type="checkbox"/> <input type="checkbox"/><br>31e. Other drug injectors? <input type="checkbox"/> <input type="checkbox"/><br>31f. Other, specify? <input type="checkbox"/> <input type="checkbox"/><br><br>Local language: _____ English: _____ |                                                                                                                                                                                                                                                                                    |                             |                                     |
| <b>32</b> | In the last 3 months, when you obtained new needles, typically, how many did you buy at one time?                                                                                                                                                                                                                                                                                                                                                                                                                                                                                                                                                                                                                                                                  | <input type="text"/> <input type="text"/> <input type="text"/>                                                                                                                                                                                                                     | <i># of needles</i>         |                                     |

This assessment documents information on a participant's behaviors. These questions ask the participant to provide sensitive information. To increase honest and accurate responses it is important to demonstrate that all information will be kept private and confidential.

This is an interviewer-administered form.

**Item-specific Instructions:**

|                                      |                                                                                                                           |
|--------------------------------------|---------------------------------------------------------------------------------------------------------------------------|
| <b>No data recorded on this page</b> | Mark this box if no data is recorded on this page other than the Participant ID, Visit Code, and the Staff Initials/Date. |
| <b>Item 32</b>                       | If the participant has not obtained his/her own needles or cannot remember, enter "000."                                  |



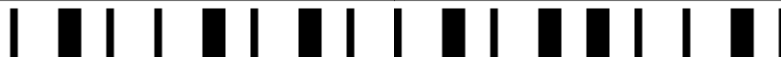

(HPTN 074) DF/Net 074

(FBA-8) 178

Visit Code:   .

Participant ID:

-      -  -

*Site Number      Network Number      Chk      Cohort*

**Follow-up Behavior Assessment**

**SEXUAL BEHAVIOR QUESTIONS**

*The next few questions are about sexual behavior. These are very personal questions. Please remember that all the information you give us is confidential. We ask that you answer the questions as honestly as you can.*

**33** In the last month, did you have vaginal or anal sex?  Yes  No → *If no, go to item 39.*

**34** In the last month, how many different female sex partners have you had?    # of female sex partners

**35** In the last month, how many different male sex partners have you had?    # of male sex partners

**36** Do you have a main partner such as a husband/wife or boyfriend/girlfriend?  Yes  No → *If no, go to item 38.*

36a. Is your main partner male or female?

Male  Female  Other, specify: (Local language) \_\_\_\_\_  
(English) \_\_\_\_\_

**37** In the last month, how many times did you have vaginal or anal sex with your main partner?    # of times → *If 000, go to item 38.*

37a. How many of these times did you (or your partner) use a condom?    # of times

**38** In the last month, how many times did you have vaginal or anal sex with someone other than a main partner?    # of times → *If 000, go to item 39.*

38a. How many of these times did you (or your partner) use a condom?    # of times

*Next I am going to ask about your sex trade (paid or paying) partners. By sex trade partners, I mean people that you had oral, vaginal or anal sex with in exchange for money, drugs, food or a place to stay.*

**39** In the last month, how many times did you give sex partners money or drugs in exchange for sex?    # of times

**40** In the last month, how many times did a sex partner give you money or drugs in exchange for sex?    # of times

This assessment documents information on a participant's behaviors. These questions ask the participant to provide sensitive information. To increase honest and accurate responses it is important to demonstrate that all information will be kept private and confidential.

This is an interviewer-administered form.

**Item-specific Instructions:**

|                |                                                                                                                                                                                                                                                                                           |
|----------------|-------------------------------------------------------------------------------------------------------------------------------------------------------------------------------------------------------------------------------------------------------------------------------------------|
| <b>Item 36</b> | "Main partner" is someone you consider your wife/husband/boyfriend/girlfriend, have oral, vaginal or anal sex with, have been in a relationship with for at least 3 weeks. Do not include anyone you have had sex with casually or in exchange for money, drugs, food or a place to stay. |
|----------------|-------------------------------------------------------------------------------------------------------------------------------------------------------------------------------------------------------------------------------------------------------------------------------------------|

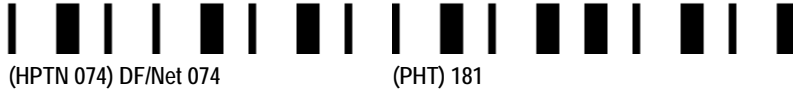

Visit Code:   .

Participant ID:

-      -  -

*Site Number      Network Number      Chk      Cohort*

**Partner HIV Test Results**

**HIV TEST RESULTS**

|          |                                                            |                                           |                                                                |                                           |                             |                                    |                                                                                                                        |  |
|----------|------------------------------------------------------------|-------------------------------------------|----------------------------------------------------------------|-------------------------------------------|-----------------------------|------------------------------------|------------------------------------------------------------------------------------------------------------------------|--|
| <b>1</b> | Specimen #1 Collection Date:                               | <input type="text"/> <input type="text"/> | <input type="text"/> <input type="text"/> <input type="text"/> | <input type="text"/> <input type="text"/> | OR <input type="checkbox"/> | <i>Not done/<br/>Not collected</i> | <i>If not done/not collected at a visit where HIV testing is required by the protocol, provide reason in Comments.</i> |  |
|          | 1a. Were any of the HIV test results positive or Reactive? | <input type="checkbox"/> Yes              | <input type="checkbox"/> No                                    |                                           |                             |                                    |                                                                                                                        |  |
| <b>2</b> | Specimen #2 Collection Date:                               | <input type="text"/> <input type="text"/> | <input type="text"/> <input type="text"/> <input type="text"/> | <input type="text"/> <input type="text"/> | OR <input type="checkbox"/> | <i>Not done/<br/>Not collected</i> | <i>If not done/not collected at a visit where HIV testing is required by the protocol, provide reason in Comments.</i> |  |
|          | 2a. Were any of the HIV test results positive or Reactive? | <input type="checkbox"/> Yes              | <input type="checkbox"/> No                                    |                                           |                             |                                    |                                                                                                                        |  |
| <b>3</b> | Final HIV Status:                                          | <input type="checkbox"/> Negative         | <input type="checkbox"/> Positive                              | <input type="checkbox"/> Indeterminate    |                             |                                    |                                                                                                                        |  |

Comments (Local language): \_\_\_\_\_

\_\_\_\_\_

Comments (English): \_\_\_\_\_

\_\_\_\_\_

The **Partner HIV Test Results** CRF documents the results of HIV testing performed at the site at scheduled and interim visits. Record test results on this form as they become available from the local lab. Fax this form to DataFax when the final test results are available and recorded.

**Item-specific Instructions:**

|                                         |                                                                                                                                 |
|-----------------------------------------|---------------------------------------------------------------------------------------------------------------------------------|
| <b>Specimen<br/>Collection<br/>Date</b> | Record the date that the specimen(s) was collected (NOT the date results were reported or recorded on the form) for this visit. |
|-----------------------------------------|---------------------------------------------------------------------------------------------------------------------------------|

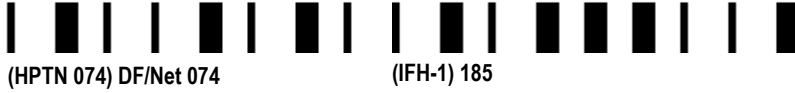

Visit Code:   .

**Participant ID:**

-     -  -

*Site Number      Network Number      Chk      Cohort*

**Assessment Date:**

*dd      MMM      yy*

**Index Follow-up HIV Care and ART**

*The next few questions are about anti-HIV medicines called antiretroviral therapy that you may be taking. These questions are not about drugs you may be taking to treat substance use. We need to know what is really happening, not what you think we "want to hear." Many people find it hard to take their medications all of the time.*

**1** Since your last visit, have you seen an HIV clinician?  Yes  No → **If no, go to item 2.**

1a. If yes, on what date?

*dd      MMM      yy*

1b. How many total clinical visits have you had since your last study visit?   # of clinical visits

**2** Since your last study visit, with whom have you shared that you are living with HIV? *Mark all that apply.*

2a. Spouse/Partner/Girl-Boyfriend  2e. Friends

2b. Own children  2f. Others

2c. Parents  2g. No one

2d. Other family members  2h. Refuse to answer

**3** How many of your drug partners (the people you inject drugs with) know that you have HIV?

All of my partners  Less than half of my partners

More than half of my partners  None of my partners

This is an interviewer-administered form.

**Item-specific Instructions:**

|                |                                                                                                                 |
|----------------|-----------------------------------------------------------------------------------------------------------------|
| <b>Item 1a</b> | When possible record the complete date (day, month, year). If the exact date is unknown, record month and year. |
|----------------|-----------------------------------------------------------------------------------------------------------------|

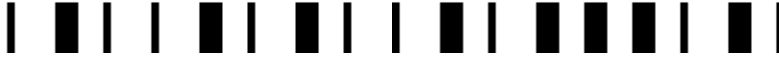

(HPTN 074) DF/Net 074

(IFH-2) 186

Visit Code:   .

**Participant ID:**

|                      |                      |                      |                      |                      |                      |                      |                      |
|----------------------|----------------------|----------------------|----------------------|----------------------|----------------------|----------------------|----------------------|
| <input type="text"/> | <input type="text"/> | <input type="text"/> | <input type="text"/> | <input type="text"/> | <input type="text"/> | <input type="text"/> | <input type="text"/> |
| Site Number          |                      | Network Number       |                      | Chk                  | Cohort               |                      |                      |

**Index Follow-up HIV Care and ART**

**4** Who is the most supportive in helping you with your HIV care and treatment?

- Health care providers (such as doctors or nurses)
- Your spouse/live-in partner/long-term partner
- Injecting partners
- Commercial sex workers
- Your mother or father
- Your in-laws
- Other family members
- Priests/religious leaders
- Your neighbors or community members
- Friends
- Your employers
- Other, specify:

Local language: \_\_\_\_\_ English: \_\_\_\_\_

**5** How often have you talked to your family or support person about your HIV medications?

- |                                                  |                                       |
|--------------------------------------------------|---------------------------------------|
| <input type="checkbox"/> More than once per week | <input type="checkbox"/> Once a month |
| <input type="checkbox"/> Once a week             | <input type="checkbox"/> One time     |
| <input type="checkbox"/> 2-3 times a month       | <input type="checkbox"/> Never        |

**6** Since your last visit, has any HIV clinician told you that you should initiate ART treatment for your own health?

- Yes
- No
- Not applicable

**7** Since your last visit, have you visited an HIV clinic or pharmacy with the intention of starting ART?

- Yes  No

This is an interviewer-administered form.

**Item-specific Instructions:**

|               |                                                                                                 |
|---------------|-------------------------------------------------------------------------------------------------|
| <b>Item 6</b> | If the participant has not seen an HIV clinician since their last visit, mark “Not applicable.” |
|---------------|-------------------------------------------------------------------------------------------------|



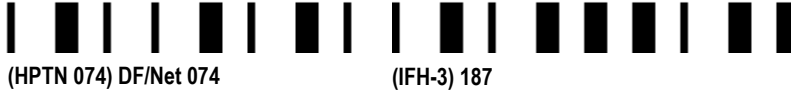

Visit Code:   .

**Participant ID:**

-     -  -

*Site Number                      Network Number                      Chk                      Cohort*

**Index Follow-up HIV Care and ART**

**8** Are you currently taking HIV medications (ART)?  Yes  No → **If no, go to item 16 on page 4.**

8a. Since what date have you been on HIV medications (ART) treatment?              **OR**  Since last study visit

*dd                      MMM                      yy*

**9** Since your last study visit, with whom have you shared that you are taking ART? *Mark all that apply.*

- 9a. Spouse/Partner/Girl-Boyfriend
- 9b. Own children
- 9c. Parents
- 9d. Other family members
- 9e. Friends
- 9f. Others
- 9g. No one
- 9h. Refuse to answer
- 9i. I've not taken ART since my last study visit

**10** Since your last study visit, has your doctor changed your HIV medications (ART) drugs?  Yes  No → **If no, go to item 11.**

10a. Were your HIV medications (ART) drugs changed due to side effects or some other reason?  side effects  something else

**11** We know that it is very difficult to take your HIV medications all the time. When was the last time you missed taking any doses of your ART medication?

- Within the past week
- 1-2 weeks ago
- 3-4 weeks ago
- 1-3 months ago
- Never missed taking medications in past 3 months → **End of form.**

**12** In the **last month**, on about how many days did you miss at least one tablet?   days

**13** Did you miss at least one tablet in the **last four days**?  Yes  No → **If no, go to item 15 on page 4.**

13a. In the **last four days**, on how many days did you miss at least one tablet?   days

**14** Did you miss at least one tablet **yesterday**?  Yes  No

This is an interviewer-administered form.

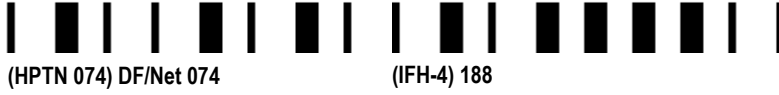

Visit Code:   .

No data recorded on this page

**Participant ID:**

-      -  -

*Site Number      Network Number      Chk      Cohort*

**Index Follow-up HIV Care and ART**

**15** The last time you missed at least one tablet, which of these best describes the reason why? *Mark only one. End of form.*

- I forgot*
- I did not have the medication with me at the time I needed to take it*
- I did not want person(s) nearby to see me taking the medication*
- I was trying to avoid side effects*
- I felt healthy*
- I was drunk*
- I am not engaging in any behaviors that can transmit HIV to others*
- I do not believe the medicines are beneficial*
- not applicable—no missed tablets*
- Other, specify:*

Local language: \_\_\_\_\_ English: \_\_\_\_\_

**16** If you were on ART since your last visit, have you stopped? By stopped we mean that you have not taken any of your medication for the last 2 weeks.  Yes  No → **If no, go to item 18.**

**17** What date did you stop taking ART?

*dd                      MMM                      yy*

This is an interviewer-administered form.

**Item-specific Instructions:**

|                                      |                                                                                                                           |
|--------------------------------------|---------------------------------------------------------------------------------------------------------------------------|
| <b>No data recorded on this page</b> | Mark this box if no data is recorded on this page other than the Participant ID, Visit Code, and the Staff Initials/Date. |
|--------------------------------------|---------------------------------------------------------------------------------------------------------------------------|

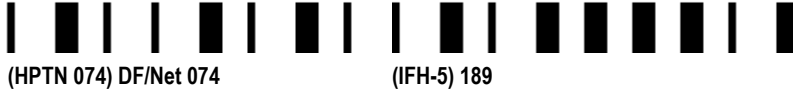

Visit Code:   .

No data recorded on this page

Participant ID:

-     -  -

*Site Number      Network Number      Chk      Cohort*

**Index Follow-up HIV Care and ART**

|                                                                |                                                                                                                                                                                                   |                          |                          |                                         |
|----------------------------------------------------------------|---------------------------------------------------------------------------------------------------------------------------------------------------------------------------------------------------|--------------------------|--------------------------|-----------------------------------------|
| <b>18</b>                                                      | Sometimes people have trouble taking HIV medications (ART) because of personal situations or circumstances. What are the reasons you have stopped taking ART or have not yet started to take ART? | <i>Agree</i>             | <i>Disagree</i>          | <i>Not relevant/<br/>Not Applicable</i> |
|                                                                | 18a. You don't think that you need it.                                                                                                                                                            | <input type="checkbox"/> | <input type="checkbox"/> | <input type="checkbox"/>                |
|                                                                | 18b. You don't have time to go to the clinic.                                                                                                                                                     | <input type="checkbox"/> | <input type="checkbox"/> | <input type="checkbox"/>                |
|                                                                | 18c. You don't have the energy or motivation to go to the clinic.                                                                                                                                 | <input type="checkbox"/> | <input type="checkbox"/> | <input type="checkbox"/>                |
|                                                                | 18d. You missed an appointment, so it is difficult to go back.                                                                                                                                    | <input type="checkbox"/> | <input type="checkbox"/> | <input type="checkbox"/>                |
|                                                                | 18e. You have been too sick to go to the clinic.                                                                                                                                                  | <input type="checkbox"/> | <input type="checkbox"/> | <input type="checkbox"/>                |
|                                                                | 18f. Your drug use got in the way of going to the clinic.                                                                                                                                         | <input type="checkbox"/> | <input type="checkbox"/> | <input type="checkbox"/>                |
|                                                                | 18g. You had unwanted side effects or complications.                                                                                                                                              | <input type="checkbox"/> | <input type="checkbox"/> | <input type="checkbox"/>                |
|                                                                | 18h. You don't understand when you are supposed to take each pill.                                                                                                                                | <input type="checkbox"/> | <input type="checkbox"/> | <input type="checkbox"/>                |
|                                                                | 18i. You sold or lost your medicine or your medicine was stolen.                                                                                                                                  | <input type="checkbox"/> | <input type="checkbox"/> | <input type="checkbox"/>                |
|                                                                | 18j. Your drinking (alcohol) got in the way of going back to the clinic.                                                                                                                          | <input type="checkbox"/> | <input type="checkbox"/> | <input type="checkbox"/>                |
| 18k. You had to wait too long, so you left without being seen. | <input type="checkbox"/>                                                                                                                                                                          | <input type="checkbox"/> | <input type="checkbox"/> |                                         |
| <b>19</b>                                                      | Sometimes people find it difficult to take HIV medications (ART) because of their family or friends. What are the reasons you have stopped taking ART or have not yet started to take ART?        | <i>Agree</i>             | <i>Disagree</i>          | <i>Not relevant/<br/>Not Applicable</i> |
|                                                                | 19a. You don't have enough support from family or friends.                                                                                                                                        | <input type="checkbox"/> | <input type="checkbox"/> | <input type="checkbox"/>                |
|                                                                | 19b. You don't want others to know you have HIV (e.g., see me take medication).                                                                                                                   | <input type="checkbox"/> | <input type="checkbox"/> | <input type="checkbox"/>                |

This is an interviewer-administered form.

**Item-specific Instructions:**

|                                      |                                                                                                                           |
|--------------------------------------|---------------------------------------------------------------------------------------------------------------------------|
| <b>No data recorded on this page</b> | Mark this box if no data is recorded on this page other than the Participant ID, Visit Code, and the Staff Initials/Date. |
|--------------------------------------|---------------------------------------------------------------------------------------------------------------------------|

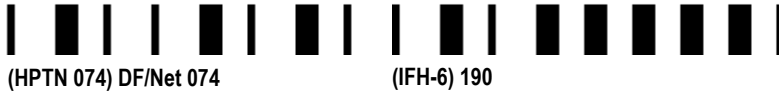

Visit Code:   .

No data recorded on this page

Participant ID:

-      -  -

*Site Number*      *Network Number*      *Chk*      *Cohort*

**Index Follow-up HIV Care and ART**

|      | Many people find it difficult to take HIV medications (ART), even if they have previously taken ART, because of challenges in the health systems/health care process. What were the reasons you have stopped taking ART or have not yet started to take ART? | <i>Agree</i>             | <i>Disagree</i>          | <i>Not relevant/<br/>Not applicable</i> |
|------|--------------------------------------------------------------------------------------------------------------------------------------------------------------------------------------------------------------------------------------------------------------|--------------------------|--------------------------|-----------------------------------------|
| 20a. | You do not have the necessary materials (e.g. paperwork, identification, test results) needed by the clinic.                                                                                                                                                 | <input type="checkbox"/> | <input type="checkbox"/> | <input type="checkbox"/>                |
| 20b. | ART is too expensive.                                                                                                                                                                                                                                        | <input type="checkbox"/> | <input type="checkbox"/> | <input type="checkbox"/>                |
| 20c. | ART was not available.                                                                                                                                                                                                                                       | <input type="checkbox"/> | <input type="checkbox"/> | <input type="checkbox"/>                |
| 20d. | HIV care provider would not continue your medicine or prescription.                                                                                                                                                                                          | <input type="checkbox"/> | <input type="checkbox"/> | <input type="checkbox"/>                |
| 20e. | You do not know how or where to get ART.                                                                                                                                                                                                                     | <input type="checkbox"/> | <input type="checkbox"/> | <input type="checkbox"/>                |
| 20f. | You find transport/travel to the clinic is difficult.                                                                                                                                                                                                        | <input type="checkbox"/> | <input type="checkbox"/> | <input type="checkbox"/>                |
| 20g. | You have been traveling.                                                                                                                                                                                                                                     | <input type="checkbox"/> | <input type="checkbox"/> | <input type="checkbox"/>                |
| 20h. | You have been in jail or incarcerated.                                                                                                                                                                                                                       | <input type="checkbox"/> | <input type="checkbox"/> | <input type="checkbox"/>                |
| 20i. | You are scared of being arrested for your drug use.                                                                                                                                                                                                          | <input type="checkbox"/> | <input type="checkbox"/> | <input type="checkbox"/>                |
| 20j. | You will need to register with the government as being a drug user.                                                                                                                                                                                          | <input type="checkbox"/> | <input type="checkbox"/> | <input type="checkbox"/>                |

**21** Are there any other reasons you find it difficult to continue taking ART or why you have not yet started to take ART?

*Local language:* \_\_\_\_\_

*English:* \_\_\_\_\_

This is an interviewer-administered form.

**Item-specific Instructions:**

|                                      |                                                                                                                           |
|--------------------------------------|---------------------------------------------------------------------------------------------------------------------------|
| <b>No data recorded on this page</b> | Mark this box if no data is recorded on this page other than the Participant ID, Visit Code, and the Staff Initials/Date. |
|--------------------------------------|---------------------------------------------------------------------------------------------------------------------------|



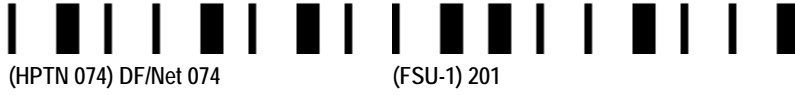

Visit Code:   .

Participant ID:

-      -  -

*Site Number Network Number Chk Cohort*

Assessment Date:

*dd MMM yy*

**Follow-up Substance Use Treatment**

**1** Since your last visit, have you tried to start MAT (methadone or buprenorphine) to treat your substance use?  Yes  No → *If no, go to item 2.*

1a. When was your last visit?

*dd MMM yy*

**2** Are you currently taking methadone or buprenorphine?  Yes  No → *If no, go to item 3.*  
 If yes, and this is the participant's first time in MAT during the study, complete the Substance Use Treatment Initiation CRF.

2a. How long have you currently been on MAT (methadone or buprenorphine)?   months

**3** If you were on substance use treatment since your last visit, have you stopped taking MAT or buprenorphine? By stopped, we mean that you have not been taking it for at least 2 weeks.  Yes  No → *If no, end of form.*

3a. What date did you stop taking MMT or buprenorphine?

*dd MMM yy*

This CRF monitors the participant's status in substance use treatment throughout the study.

This is an interviewer-administered form.

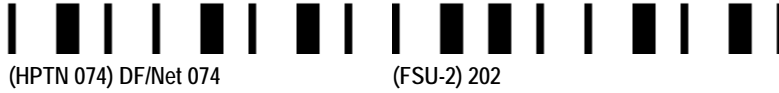

Visit Code:   .

No data recorded on this page

Participant ID:

-      -  -

*Site Number*      *Network Number*      *Chk*      *Cohort*

**Follow-up Substance Use Treatment**

|          |                                                                                                                                                                                  |                          |                          |                                         |
|----------|----------------------------------------------------------------------------------------------------------------------------------------------------------------------------------|--------------------------|--------------------------|-----------------------------------------|
| <b>4</b> | Sometimes people find it difficult to continue MMT or buprenorphine because of personal situations or circumstances. What are the reasons you have stopped MMT or buprenorphine? | <i>Agree</i>             | <i>Disagree</i>          | <i>Not relevant/<br/>Not applicable</i> |
| 4a.      | You want to keep injecting.                                                                                                                                                      | <input type="checkbox"/> | <input type="checkbox"/> | <input type="checkbox"/>                |
| 4b.      | You want to handle your drug problem or stop injecting on your own.                                                                                                              | <input type="checkbox"/> | <input type="checkbox"/> | <input type="checkbox"/>                |
| 4c.      | You had side effects or withdrawal symptoms.                                                                                                                                     | <input type="checkbox"/> | <input type="checkbox"/> | <input type="checkbox"/>                |
| 4d.      | Your injecting got in the way of going to the clinic.                                                                                                                            | <input type="checkbox"/> | <input type="checkbox"/> | <input type="checkbox"/>                |
| 4e.      | Your drug use got in the way of going to the clinic.                                                                                                                             | <input type="checkbox"/> | <input type="checkbox"/> | <input type="checkbox"/>                |
| 4f.      | You have been too sick to go to the clinic.                                                                                                                                      | <input type="checkbox"/> | <input type="checkbox"/> | <input type="checkbox"/>                |
| 4g.      | You missed an appointment, so it is difficult to go back.                                                                                                                        | <input type="checkbox"/> | <input type="checkbox"/> | <input type="checkbox"/>                |
| 4h.      | You can handle your drug problem yourself.                                                                                                                                       | <input type="checkbox"/> | <input type="checkbox"/> | <input type="checkbox"/>                |
| 4i.      | Your drinking (alcohol) got in the way of going to the clinic.                                                                                                                   | <input type="checkbox"/> | <input type="checkbox"/> | <input type="checkbox"/>                |
| <b>5</b> | Sometimes people find it difficult to continue MMT or buprenorphine because of their family or friends. What are the reasons you have stopped MMT or buprenorphine?              | <i>Agree</i>             | <i>Disagree</i>          | <i>Not relevant/<br/>Not applicable</i> |
| 5a.      | You don't have enough support from family or friends.                                                                                                                            | <input type="checkbox"/> | <input type="checkbox"/> | <input type="checkbox"/>                |
| 5b.      | You don't want to stop seeing the friends you inject with.                                                                                                                       | <input type="checkbox"/> | <input type="checkbox"/> | <input type="checkbox"/>                |
| 5c.      | Your family objects to drug treatment.                                                                                                                                           | <input type="checkbox"/> | <input type="checkbox"/> | <input type="checkbox"/>                |
| 5d.      | You don't feel you have enough support from friends and family.                                                                                                                  | <input type="checkbox"/> | <input type="checkbox"/> | <input type="checkbox"/>                |

This CRF monitors the participant's status in substance use treatment throughout the study.

This is an interviewer-administered form.

**Item-specific Instructions:**

|                                      |                                                                                                                           |
|--------------------------------------|---------------------------------------------------------------------------------------------------------------------------|
| <b>No data recorded on this page</b> | Mark this box if no data is recorded on this page other than the Participant ID, Visit Code, and the Staff Initials/Date. |
|--------------------------------------|---------------------------------------------------------------------------------------------------------------------------|

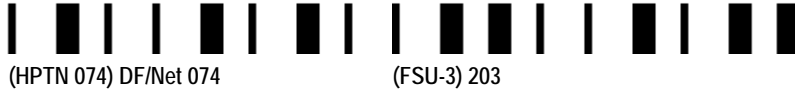

Visit Code:   .

No data recorded on this page

Participant ID:

-      -  -

*Site Number*      *Network Number*      *Chk*      *Cohort*

**Follow-up Substance Use Treatment**

**6** Many people find it difficult to continue MMT or buprenorphine, even if they have previously tried, because of challenges in the health systems/health care process. What were the reasons you have not continued MMT or buprenorphine?

|                                                                  | <i>Agree</i>             | <i>Disagree</i>          | <i>Not relevant/<br/>Not applicable</i> |
|------------------------------------------------------------------|--------------------------|--------------------------|-----------------------------------------|
| 6a. The waiting list is too long.                                | <input type="checkbox"/> | <input type="checkbox"/> | <input type="checkbox"/>                |
| 6b. You don't have the necessary materials (ID card, paperwork). | <input type="checkbox"/> | <input type="checkbox"/> | <input type="checkbox"/>                |
| 6c. You find getting on drug treatment is too much of a hassle.  | <input type="checkbox"/> | <input type="checkbox"/> | <input type="checkbox"/>                |
| 6d. You do not know how or where to get drug treatment.          | <input type="checkbox"/> | <input type="checkbox"/> | <input type="checkbox"/>                |
| 6e. You find transport/travel to the clinic is difficult.        | <input type="checkbox"/> | <input type="checkbox"/> | <input type="checkbox"/>                |
| 6f. You have been traveling.                                     | <input type="checkbox"/> | <input type="checkbox"/> | <input type="checkbox"/>                |
| 6g. You have been in jail or incarcerated.                       | <input type="checkbox"/> | <input type="checkbox"/> | <input type="checkbox"/>                |
| 6h. You are scared of being arrested for your drug use.          | <input type="checkbox"/> | <input type="checkbox"/> | <input type="checkbox"/>                |
| 6i. You are scared of losing your job.                           | <input type="checkbox"/> | <input type="checkbox"/> | <input type="checkbox"/>                |
| 6j. You were asked to leave MAT.                                 | <input type="checkbox"/> | <input type="checkbox"/> | <input type="checkbox"/>                |

**7** Are there any other reasons you find it difficult to continue MAT or buprenorphine?

*Local language:* \_\_\_\_\_

*English:* \_\_\_\_\_

This CRF monitors the participant's status in substance use treatment throughout the study.

This is an interviewer-administered form.

**Item-specific Instructions:**

|                                      |                                                                                                                           |
|--------------------------------------|---------------------------------------------------------------------------------------------------------------------------|
| <b>No data recorded on this page</b> | Mark this box if no data is recorded on this page other than the Participant ID, Visit Code, and the Staff Initials/Date. |
|--------------------------------------|---------------------------------------------------------------------------------------------------------------------------|

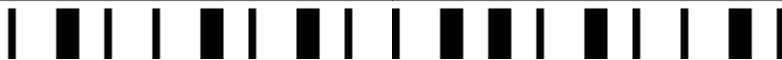

(HPTN 074) DF/Net 074

(SNE-1) 210

Encounter #:

Note: Number encounters sequentially (001, 002, 003) for each participant.

Participant ID:

-     -  -

*Site Number      Network Number      Chk      Cohort*

Assessment Date:

*dd      MMM      yy*

**Systems Navigator Encounter**

1 Staff ID: \_\_\_\_\_

2 Activity type:       *Initial*       *Weekly/Monthly*       *Interim*

3 Contact initiated/requested by:

- Systems navigator*       *Participant*
- Psychosocial counselor*       *Other, specify:*
- Agency/clinic*      *Local language:* \_\_\_\_\_ *English:* \_\_\_\_\_
- Participant's designated support person*

4 Type of encounter:

- In person (not at home)*       *E-mail/Internet*
- Home contact*       *Text/SMS*
- Telephone*       *Other, specify:*
- Social media*      *Local language:* \_\_\_\_\_ *English:* \_\_\_\_\_

5 Is the participant currently taking antiretroviral therapy (ART)?       *Yes*       *No*

6 Is the participant currently receiving methadone or buprenorphine?       *Yes*       *No*

7 Does the participant have a designated support person?       *Yes*       *No*      → *If no, go to item 8 on page 2.*

7a. Did the support person participate in this contact activity?       *Yes*       *No*

7b. What is the relationship of the support person to the participant?

- Spouse/partner/girl- boyfriend*       *Friend*
- Father/Mother*       *Other, specify:*
- Sibling*      *Local language:* \_\_\_\_\_ *English:* \_\_\_\_\_
- Other family member*

Use this CRF in conjunction with the Intervention Manual to document participant encounters with the system navigator. Complete this CRF any time the participant has contact with a systems navigator.

**Item-specific Instructions:**

|                         |                                                                                                                                                                                                                     |
|-------------------------|---------------------------------------------------------------------------------------------------------------------------------------------------------------------------------------------------------------------|
| <b>Encounter Number</b> | Number encounters sequentially throughout the study starting with 001. Do not repeat encounter numbers. Do not re-number any encounters after faxing, unless instructed by the SDMC.                                |
| <b>Staff ID</b>         | Identify the staff member conducting the encounter. Do not use full names, document only the staff member's initials (last, first). If more than one staff members share initials utilize a middle initial as well. |
| <b>Activity Type</b>    | Indicate whether this communication is the initial, weekly or monthly contact as outlined in the protocol. If the contact is not a scheduled encounter, or due to an ongoing crisis period, indicate "interim."     |



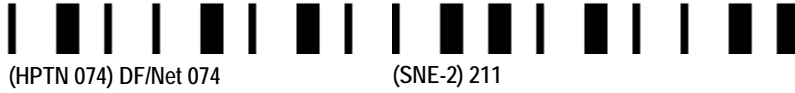

(HPTN 074) DF/Net 074

(SNE-2) 211

Encounter #:

Note: Number encounters sequentially (001, 002, 003) for each participant.

Participant ID:

---

Site Number      Network Number      Chk      Cohort

**Systems Navigator Encounter**

|                                                                                 |                                                                                                                                                                                                                                                                                                                                                                                                                                                                                                                                                                                                                                                                                                                                                                                                                                                                                                                                                                                                                                                                                                                                                       |                          |                          |                                                       |                                              |                                        |                                                      |                                                                    |                                               |                                                         |                                                         |                                                                                 |                                                                   |                                                         |                                                           |                                                     |
|---------------------------------------------------------------------------------|-------------------------------------------------------------------------------------------------------------------------------------------------------------------------------------------------------------------------------------------------------------------------------------------------------------------------------------------------------------------------------------------------------------------------------------------------------------------------------------------------------------------------------------------------------------------------------------------------------------------------------------------------------------------------------------------------------------------------------------------------------------------------------------------------------------------------------------------------------------------------------------------------------------------------------------------------------------------------------------------------------------------------------------------------------------------------------------------------------------------------------------------------------|--------------------------|--------------------------|-------------------------------------------------------|----------------------------------------------|----------------------------------------|------------------------------------------------------|--------------------------------------------------------------------|-----------------------------------------------|---------------------------------------------------------|---------------------------------------------------------|---------------------------------------------------------------------------------|-------------------------------------------------------------------|---------------------------------------------------------|-----------------------------------------------------------|-----------------------------------------------------|
| <b>8</b>                                                                        | 0-5 minutes                                                                                                                                                                                                                                                                                                                                                                                                                                                                                                                                                                                                                                                                                                                                                                                                                                                                                                                                                                                                                                                                                                                                           | 6-10 minutes             | 11-15 minutes            |                                                       |                                              |                                        |                                                      |                                                                    |                                               |                                                         |                                                         |                                                                                 |                                                                   |                                                         |                                                           |                                                     |
|                                                                                 | <input type="checkbox"/>                                                                                                                                                                                                                                                                                                                                                                                                                                                                                                                                                                                                                                                                                                                                                                                                                                                                                                                                                                                                                                                                                                                              | <input type="checkbox"/> | <input type="checkbox"/> |                                                       |                                              |                                        |                                                      |                                                                    |                                               |                                                         |                                                         |                                                                                 |                                                                   |                                                         |                                                           |                                                     |
| <b>9</b>                                                                        | 16-30 minutes                                                                                                                                                                                                                                                                                                                                                                                                                                                                                                                                                                                                                                                                                                                                                                                                                                                                                                                                                                                                                                                                                                                                         | 31-60 minutes            | 60+ minutes              |                                                       |                                              |                                        |                                                      |                                                                    |                                               |                                                         |                                                         |                                                                                 |                                                                   |                                                         |                                                           |                                                     |
|                                                                                 | <input type="checkbox"/>                                                                                                                                                                                                                                                                                                                                                                                                                                                                                                                                                                                                                                                                                                                                                                                                                                                                                                                                                                                                                                                                                                                              | <input type="checkbox"/> | <input type="checkbox"/> |                                                       |                                              |                                        |                                                      |                                                                    |                                               |                                                         |                                                         |                                                                                 |                                                                   |                                                         |                                                           |                                                     |
| <b>10</b>                                                                       | Primary focus of contact:                                                                                                                                                                                                                                                                                                                                                                                                                                                                                                                                                                                                                                                                                                                                                                                                                                                                                                                                                                                                                                                                                                                             |                          |                          |                                                       |                                              |                                        |                                                      |                                                                    |                                               |                                                         |                                                         |                                                                                 |                                                                   |                                                         |                                                           |                                                     |
|                                                                                 | <table border="0"> <tr> <td><input type="checkbox"/> Substance use treatment</td> <td><input type="checkbox"/> Legal/Judicial</td> </tr> <tr> <td><input type="checkbox"/> HIV care</td> <td><input type="checkbox"/> Sexual health services</td> </tr> <tr> <td><input type="checkbox"/> Needle and syringe exchange programs</td> <td><input type="checkbox"/> Social services</td> </tr> <tr> <td><input type="checkbox"/> ART initiation/Management</td> <td><input type="checkbox"/> Priests/religious leaders</td> </tr> <tr> <td><input type="checkbox"/> Assistance with primary designated support person</td> <td><input type="checkbox"/> Your neighbors or community members</td> </tr> <tr> <td><input type="checkbox"/> Social network management</td> <td><input type="checkbox"/> Clinical/medical management</td> </tr> <tr> <td><input type="checkbox"/> Additional counseling</td> <td><input type="checkbox"/> Other, specify:</td> </tr> </table> <p style="text-align: right;">Local language: _____</p> <p style="text-align: right;">English: _____</p>                                                                       |                          |                          | <input type="checkbox"/> Substance use treatment      | <input type="checkbox"/> Legal/Judicial      | <input type="checkbox"/> HIV care      | <input type="checkbox"/> Sexual health services      | <input type="checkbox"/> Needle and syringe exchange programs      | <input type="checkbox"/> Social services      | <input type="checkbox"/> ART initiation/Management      | <input type="checkbox"/> Priests/religious leaders      | <input type="checkbox"/> Assistance with primary designated support person      | <input type="checkbox"/> Your neighbors or community members      | <input type="checkbox"/> Social network management      | <input type="checkbox"/> Clinical/medical management      | <input type="checkbox"/> Additional counseling      |
| <input type="checkbox"/> Substance use treatment                                | <input type="checkbox"/> Legal/Judicial                                                                                                                                                                                                                                                                                                                                                                                                                                                                                                                                                                                                                                                                                                                                                                                                                                                                                                                                                                                                                                                                                                               |                          |                          |                                                       |                                              |                                        |                                                      |                                                                    |                                               |                                                         |                                                         |                                                                                 |                                                                   |                                                         |                                                           |                                                     |
| <input type="checkbox"/> HIV care                                               | <input type="checkbox"/> Sexual health services                                                                                                                                                                                                                                                                                                                                                                                                                                                                                                                                                                                                                                                                                                                                                                                                                                                                                                                                                                                                                                                                                                       |                          |                          |                                                       |                                              |                                        |                                                      |                                                                    |                                               |                                                         |                                                         |                                                                                 |                                                                   |                                                         |                                                           |                                                     |
| <input type="checkbox"/> Needle and syringe exchange programs                   | <input type="checkbox"/> Social services                                                                                                                                                                                                                                                                                                                                                                                                                                                                                                                                                                                                                                                                                                                                                                                                                                                                                                                                                                                                                                                                                                              |                          |                          |                                                       |                                              |                                        |                                                      |                                                                    |                                               |                                                         |                                                         |                                                                                 |                                                                   |                                                         |                                                           |                                                     |
| <input type="checkbox"/> ART initiation/Management                              | <input type="checkbox"/> Priests/religious leaders                                                                                                                                                                                                                                                                                                                                                                                                                                                                                                                                                                                                                                                                                                                                                                                                                                                                                                                                                                                                                                                                                                    |                          |                          |                                                       |                                              |                                        |                                                      |                                                                    |                                               |                                                         |                                                         |                                                                                 |                                                                   |                                                         |                                                           |                                                     |
| <input type="checkbox"/> Assistance with primary designated support person      | <input type="checkbox"/> Your neighbors or community members                                                                                                                                                                                                                                                                                                                                                                                                                                                                                                                                                                                                                                                                                                                                                                                                                                                                                                                                                                                                                                                                                          |                          |                          |                                                       |                                              |                                        |                                                      |                                                                    |                                               |                                                         |                                                         |                                                                                 |                                                                   |                                                         |                                                           |                                                     |
| <input type="checkbox"/> Social network management                              | <input type="checkbox"/> Clinical/medical management                                                                                                                                                                                                                                                                                                                                                                                                                                                                                                                                                                                                                                                                                                                                                                                                                                                                                                                                                                                                                                                                                                  |                          |                          |                                                       |                                              |                                        |                                                      |                                                                    |                                               |                                                         |                                                         |                                                                                 |                                                                   |                                                         |                                                           |                                                     |
| <input type="checkbox"/> Additional counseling                                  | <input type="checkbox"/> Other, specify:                                                                                                                                                                                                                                                                                                                                                                                                                                                                                                                                                                                                                                                                                                                                                                                                                                                                                                                                                                                                                                                                                                              |                          |                          |                                                       |                                              |                                        |                                                      |                                                                    |                                               |                                                         |                                                         |                                                                                 |                                                                   |                                                         |                                                           |                                                     |
| <b>10</b>                                                                       | Additional areas addressed: <b>Mark all that apply.</b>                                                                                                                                                                                                                                                                                                                                                                                                                                                                                                                                                                                                                                                                                                                                                                                                                                                                                                                                                                                                                                                                                               |                          |                          |                                                       |                                              |                                        |                                                      |                                                                    |                                               |                                                         |                                                         |                                                                                 |                                                                   |                                                         |                                                           |                                                     |
|                                                                                 | <table border="0"> <tr> <td><input type="checkbox"/> 10a. Substance use treatment</td> <td><input type="checkbox"/> 10h. Legal/Judicial</td> </tr> <tr> <td><input type="checkbox"/> 10b. HIV care</td> <td><input type="checkbox"/> 10i. Sexual health services</td> </tr> <tr> <td><input type="checkbox"/> 10c. Needle and syringe exchange programs</td> <td><input type="checkbox"/> 10j. Social services</td> </tr> <tr> <td><input type="checkbox"/> 10d. ART initiation/Management</td> <td><input type="checkbox"/> 10k. Priests/religious leaders</td> </tr> <tr> <td><input type="checkbox"/> 10e. Assistance with primary designated support person</td> <td><input type="checkbox"/> 10l. Your neighbors or community members</td> </tr> <tr> <td><input type="checkbox"/> 10f. Social network management</td> <td><input type="checkbox"/> 10m. Clinical/medical management</td> </tr> <tr> <td><input type="checkbox"/> 10g. Additional counseling</td> <td><input type="checkbox"/> 10n. Other, specify:</td> </tr> </table> <p style="text-align: right;">Local language: _____</p> <p style="text-align: right;">English: _____</p> |                          |                          | <input type="checkbox"/> 10a. Substance use treatment | <input type="checkbox"/> 10h. Legal/Judicial | <input type="checkbox"/> 10b. HIV care | <input type="checkbox"/> 10i. Sexual health services | <input type="checkbox"/> 10c. Needle and syringe exchange programs | <input type="checkbox"/> 10j. Social services | <input type="checkbox"/> 10d. ART initiation/Management | <input type="checkbox"/> 10k. Priests/religious leaders | <input type="checkbox"/> 10e. Assistance with primary designated support person | <input type="checkbox"/> 10l. Your neighbors or community members | <input type="checkbox"/> 10f. Social network management | <input type="checkbox"/> 10m. Clinical/medical management | <input type="checkbox"/> 10g. Additional counseling |
| <input type="checkbox"/> 10a. Substance use treatment                           | <input type="checkbox"/> 10h. Legal/Judicial                                                                                                                                                                                                                                                                                                                                                                                                                                                                                                                                                                                                                                                                                                                                                                                                                                                                                                                                                                                                                                                                                                          |                          |                          |                                                       |                                              |                                        |                                                      |                                                                    |                                               |                                                         |                                                         |                                                                                 |                                                                   |                                                         |                                                           |                                                     |
| <input type="checkbox"/> 10b. HIV care                                          | <input type="checkbox"/> 10i. Sexual health services                                                                                                                                                                                                                                                                                                                                                                                                                                                                                                                                                                                                                                                                                                                                                                                                                                                                                                                                                                                                                                                                                                  |                          |                          |                                                       |                                              |                                        |                                                      |                                                                    |                                               |                                                         |                                                         |                                                                                 |                                                                   |                                                         |                                                           |                                                     |
| <input type="checkbox"/> 10c. Needle and syringe exchange programs              | <input type="checkbox"/> 10j. Social services                                                                                                                                                                                                                                                                                                                                                                                                                                                                                                                                                                                                                                                                                                                                                                                                                                                                                                                                                                                                                                                                                                         |                          |                          |                                                       |                                              |                                        |                                                      |                                                                    |                                               |                                                         |                                                         |                                                                                 |                                                                   |                                                         |                                                           |                                                     |
| <input type="checkbox"/> 10d. ART initiation/Management                         | <input type="checkbox"/> 10k. Priests/religious leaders                                                                                                                                                                                                                                                                                                                                                                                                                                                                                                                                                                                                                                                                                                                                                                                                                                                                                                                                                                                                                                                                                               |                          |                          |                                                       |                                              |                                        |                                                      |                                                                    |                                               |                                                         |                                                         |                                                                                 |                                                                   |                                                         |                                                           |                                                     |
| <input type="checkbox"/> 10e. Assistance with primary designated support person | <input type="checkbox"/> 10l. Your neighbors or community members                                                                                                                                                                                                                                                                                                                                                                                                                                                                                                                                                                                                                                                                                                                                                                                                                                                                                                                                                                                                                                                                                     |                          |                          |                                                       |                                              |                                        |                                                      |                                                                    |                                               |                                                         |                                                         |                                                                                 |                                                                   |                                                         |                                                           |                                                     |
| <input type="checkbox"/> 10f. Social network management                         | <input type="checkbox"/> 10m. Clinical/medical management                                                                                                                                                                                                                                                                                                                                                                                                                                                                                                                                                                                                                                                                                                                                                                                                                                                                                                                                                                                                                                                                                             |                          |                          |                                                       |                                              |                                        |                                                      |                                                                    |                                               |                                                         |                                                         |                                                                                 |                                                                   |                                                         |                                                           |                                                     |
| <input type="checkbox"/> 10g. Additional counseling                             | <input type="checkbox"/> 10n. Other, specify:                                                                                                                                                                                                                                                                                                                                                                                                                                                                                                                                                                                                                                                                                                                                                                                                                                                                                                                                                                                                                                                                                                         |                          |                          |                                                       |                                              |                                        |                                                      |                                                                    |                                               |                                                         |                                                         |                                                                                 |                                                                   |                                                         |                                                           |                                                     |

Use this CRF in conjunction with the Intervention Manual to document participant encounters with the system navigator. Complete this CRF any time the participant has contact with a systems navigator.

**Item-specific Instructions:**

|                         |                                                                                                                                                                                      |
|-------------------------|--------------------------------------------------------------------------------------------------------------------------------------------------------------------------------------|
| <b>Encounter Number</b> | Number encounters sequentially throughout the study starting with 001. Do not repeat encounter numbers. Do not re-number any encounters after faxing, unless instructed by the SDMC. |
|-------------------------|--------------------------------------------------------------------------------------------------------------------------------------------------------------------------------------|

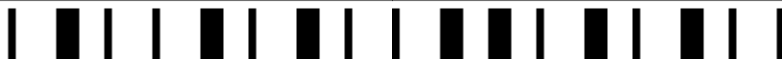

(HPTN 074) DF/Net 074

(SNE-3) 212

Encounter #:

Note: Number encounters sequentially (001, 002, 003) for each participant.

Participant ID:

-     -  -

Site Number      Network Number      Chk      Cohort

**Systems Navigator Encounter**

**11** Assessment of client status:

- Client has no immediate complicating psychosocial issues
- Client has complicating psychosocial issues that post minimal risk to ART or substance use adherence
- Client has complicating psychosocial issues that pose moderate risk to ART or substance use adherence
- Client has complicating psychosocial issues that pose severe risk to ART or substance use adherence

**12** Was a referral made at this encounter?       Yes       No      → *If no, go to item 13.*

12a. What was the referral made for? **Mark all that apply.**

- HIV care (ART)       Needle/syringe exchange program
- Initial substance use treatment       Mental health counseling
- Reentry into substance use treatment

**13** Was a social impact reported at this encounter?       Yes       No      *If yes, complete Social Impact Log for each impact. If this is an interim visit, also complete a Follow-up Visit form.*

**14** Was a Serious Adverse Experience reported at this encounter?       Yes       No      *If yes, complete AE Log for each reported AE. If this is an interim visit, also complete a Follow-up Visit form.*

**15** Did the participant report initiating any antiretroviral medications for treatment at this encounter?       Yes       No      *If yes, complete Index ART Initiation CRF. If this is an interim visit, also complete a Follow-up Visit form.*

**16** Did the participant report initiating substance use treatment (MAT) at this encounter?       Yes       No      *If yes, complete Substance Use Treatment Initiation CRF. If this is an interim visit, also complete a Follow-up Visit form.*

Use this CRF in conjunction with the Intervention Manual to document participant encounters with the system navigator. Complete this CRF any time the participant has contact with a systems navigator.

**Item-specific Instructions:**

|                         |                                                                                                                                                                                      |
|-------------------------|--------------------------------------------------------------------------------------------------------------------------------------------------------------------------------------|
| <b>Encounter Number</b> | Number encounters sequentially throughout the study starting with 001. Do not repeat encounter numbers. Do not re-number any encounters after faxing, unless instructed by the SDMC. |
|-------------------------|--------------------------------------------------------------------------------------------------------------------------------------------------------------------------------------|

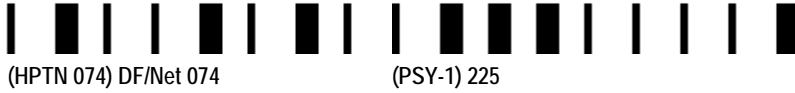

Encounter #:   
 Note: Number encounters sequentially (001, 002, 003) for each participant.

Participant ID:

---  
 Site Number Network Number Chk Cohort

Assessment Date:   
 dd MMM yy

**Psychosocial Encounter**

**1** Counselor ID: \_\_\_\_\_

**2** Contact type:

Study site visit

Telephone contact

Off-site contact, specify:

Local language: \_\_\_\_\_

English: \_\_\_\_\_

**3** Activity type:

Introductory session

First session

Second session

Booster session

Index and supporter session

**4** Does the participant have a designated support person?  Yes  No → If no, go to item 5 on page 2.

4a. Did the support person participate in this contact activity?  Yes  No

4b. What is the relationship of the support person to the participant?

Spouse/partner/girl- boyfriend

Friend

Father/Mother

Other, specify:

Sibling

Local language: \_\_\_\_\_ English: \_\_\_\_\_

Other family member

Use this CRF in conjunction with the Intervention Manual to document participant encounters with the psychosocial counselor. Complete this CRF any time the participant has contact with a psychosocial counselor.

**Item-specific Instructions:**

|                     |                                                                                                                       |
|---------------------|-----------------------------------------------------------------------------------------------------------------------|
| <b>Counselor ID</b> | Identify the staff member conducting the encounter. Do not use full names, document only the staff member's initials. |
|---------------------|-----------------------------------------------------------------------------------------------------------------------|

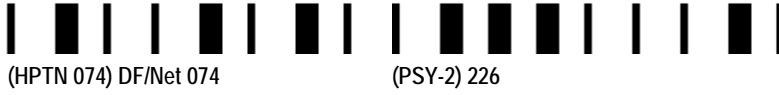

Encounter #:   
*Note: Number encounters sequentially (001, 002, 003) for each participant.*

Participant ID:

-  -  -   
 Site Number Network Number Chk Cohort

**Psychosocial Encounter**

**5** Indicate focus of session. *Mark all that apply.*

- 5a. *Dealing with HIV infection*
- 5b. *HIV disclosure*
- 5c. *Risk reduction*
- 5d. *ART adherence and/or development of medication adherence plan*
- 5e. *Engagement into care*
- 5f. *Adherence communication skills*
- 5g. *Sexual risk communication skills*
- 5h. *Injection risk communication skills*
- 5i. *Relationships/Social support*
- 5j. *HIV literacy*
- 5k. *Other, specify:*

*Local language:* \_\_\_\_\_

*English:* \_\_\_\_\_

Use this CRF in conjunction with the Intervention Manual to document participant encounters with the psychosocial counselor. Complete this CRF any time the participant has contact with a psychosocial counselor.



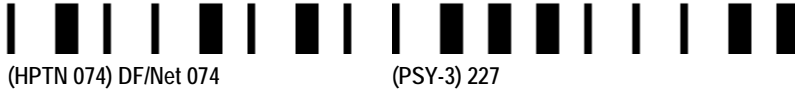

Encounter #:

*Note: Number encounters sequentially (001, 002, 003) for each participant.*

Participant ID:

-     -  -

*Site Number                  Network Number                  Chk                  Cohort*

**Psychosocial Encounter**

**6** Barriers to ART addressed. *Mark all that apply.*

- 6a. *Need for ART*
- 6b. *Hassle of taking medication*
- 6c. *Time to go to the clinic*
- 6d. *Challenges getting to the clinic*
- 6e. *Challenges/Issues in the clinic*
- 6f. *Previously missed appointments*
- 6g. *Too sick*
- 6h. *Alcohol use interference*
- 6i. *Drug use interference*
- 6j. *Don't have food/water to take medicine*
- 6k. *Don't understand when/how to take medicine*
- 6l. *Side effects/complications*
- 6m. *Family or friend support*
- 6n. *Disclosure issues, including fear of inadvertent disclosure, strategies for intentional disclosure*
- 6o. *Navigating structural issues--referral to systems navigator*
- 6p. *Other, specify:* *Local language:* \_\_\_\_\_
- English:* \_\_\_\_\_
- 6q. *No barriers addressed*

Use this CRF in conjunction with the Intervention Manual to document participant encounters with the psychosocial counselor. Complete this CRF any time the participant has contact with a psychosocial counselor.

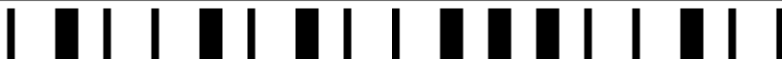

(HPTN 074) DF/Net 074

(PSY-4) 228

Encounter #:

Note: Number encounters sequentially (001, 002, 003) for each participant.

Participant ID:

-     -  -

Site Number      Network Number      Chk      Cohort

**Psychosocial Encounter**

**7** Barriers to MMT/buprenorphine addressed. Mark all that apply.

- 7a. Need for MMT/buprenorphine
- 7b. Hassle of taking medication
- 7c. Time to go to the clinic
- 7d. Going to the clinic is a hassle
- 7e. Previously missed appointments
- 7f. Too sick
- 7g. Alcohol use interference
- 7h. Drug use interference
- 7i. Don't have food/water to take medicine
- 7j. Don't understand when/how to take medicine
- 7k. Side effects/complications
- 7l. Family or friend support
- 7m. Navigating structural issues—referral to systems navigator
- 7n. Other, specify: \_\_\_\_\_ Local language: \_\_\_\_\_  
English: \_\_\_\_\_
- 7o. No barriers addressed

**8** Total number of minutes of activity:

|                          |                          |                          |
|--------------------------|--------------------------|--------------------------|
| 0–5 minutes              | 6–10 minutes             | 11–15 minutes            |
| <input type="checkbox"/> | <input type="checkbox"/> | <input type="checkbox"/> |
| 16–30 minutes            | 31–60 minutes            | 60+ minutes              |
| <input type="checkbox"/> | <input type="checkbox"/> | <input type="checkbox"/> |

**9** As a result of this counseling, were systems navigator services provided?  Yes  No

Use this CRF in conjunction with the Intervention Manual to document participant encounters with the psychosocial counselor. Complete this CRF any time the participant has contact with a psychosocial counselor.

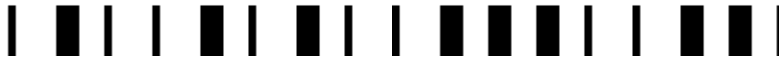

(HPTN 074) DF/Net 074

(SS) 230

Visit Code:   .

Participant ID:

|                      |                      |                       |                      |                      |                      |                      |                      |
|----------------------|----------------------|-----------------------|----------------------|----------------------|----------------------|----------------------|----------------------|
| <input type="text"/> | <input type="text"/> | <input type="text"/>  | <input type="text"/> | <input type="text"/> | <input type="text"/> | <input type="text"/> | <input type="text"/> |
| <i>Site Number</i>   |                      | <i>Network Number</i> |                      |                      | <i>Chk</i>           | <i>Cohort</i>        |                      |

### Specimen Storage

#### 1 PLASMA

Specimen Collection Date:

|                      |                      |                      |                      |                      |                      |
|----------------------|----------------------|----------------------|----------------------|----------------------|----------------------|
| <input type="text"/> | <input type="text"/> | <input type="text"/> | <input type="text"/> | <input type="text"/> | <input type="text"/> |
| <i>dd</i>            |                      | <i>MMM</i>           |                      | <i>yy</i>            |                      |

*Stored*     
  *Not stored*     
  *Not collected*     
  *Not required*

1a. Reason not stored or not collected: *Local language:* \_\_\_\_\_  
*English:* \_\_\_\_\_

#### 2 FROZEN URINE

Specimen Collection Date:

|                      |                      |                      |                      |                      |                      |
|----------------------|----------------------|----------------------|----------------------|----------------------|----------------------|
| <input type="text"/> | <input type="text"/> | <input type="text"/> | <input type="text"/> | <input type="text"/> | <input type="text"/> |
| <i>dd</i>            |                      | <i>MMM</i>           |                      | <i>yy</i>            |                      |

*Stored*     
  *Not stored*     
  *Not collected*     
  *Not required*

2a. Reason not stored or not collected: *Local language:* \_\_\_\_\_  
*English:* \_\_\_\_\_

#### 3 DRIED URINE CARTRIDGE

Specimen Collection Date:

|                      |                      |                      |                      |                      |                      |
|----------------------|----------------------|----------------------|----------------------|----------------------|----------------------|
| <input type="text"/> | <input type="text"/> | <input type="text"/> | <input type="text"/> | <input type="text"/> | <input type="text"/> |
| <i>dd</i>            |                      | <i>MMM</i>           |                      | <i>yy</i>            |                      |

*Stored*     
  *Not stored*     
  *Not collected*     
  *Not required*

3a. Reason not stored or not collected: *Local language:* \_\_\_\_\_  
*English:* \_\_\_\_\_

#### 4 DRIED URINE FILTER PAPER

Specimen Collection Date:

|                      |                      |                      |                      |                      |                      |
|----------------------|----------------------|----------------------|----------------------|----------------------|----------------------|
| <input type="text"/> | <input type="text"/> | <input type="text"/> | <input type="text"/> | <input type="text"/> | <input type="text"/> |
| <i>dd</i>            |                      | <i>MMM</i>           |                      | <i>yy</i>            |                      |

*Stored*     
  *Not stored*     
  *Not collected*     
  *Not required*

4a. Reason not stored or not collected: *Local language:* \_\_\_\_\_  
*English:* \_\_\_\_\_

Comments (*Local language*): \_\_\_\_\_

Comments (*English*): \_\_\_\_\_

This form is used to document the storage of specimens that will be tested at a lab other than the site local laboratory.

**Item-specific Instructions:**

|                  |                                                                                                                                                                                                                                                                                                                                                                                        |
|------------------|----------------------------------------------------------------------------------------------------------------------------------------------------------------------------------------------------------------------------------------------------------------------------------------------------------------------------------------------------------------------------------------|
| <b>Items 1-4</b> | <ul style="list-style-type: none"><li>• Mark “not stored” if the specimen was collected as required at this visit but was not stored.</li><li>• Mark “not collected” if the specimen is required to be collected and stored at this visit but was not collected.</li><li>• Mark “not required” if a specimen is not required and was not collected and stored at this visit.</li></ul> |
|------------------|----------------------------------------------------------------------------------------------------------------------------------------------------------------------------------------------------------------------------------------------------------------------------------------------------------------------------------------------------------------------------------------|

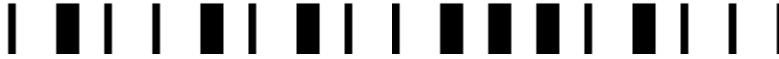

(HPTN 074) DF/Net 074

(ACL) 232

Page:

Participant ID:

-     -  -

*Site Number      Network Number      Chk      Cohort*

Date of Contact:

*dd      MMM      yy*

**Agency Contact**

**1** Contact initiated by:

*Systems navigator*  
 *Counselor*  
 *Agency/clinic*  
 *Other, specify: (Local Language) \_\_\_\_\_ (English) \_\_\_\_\_*

**2** Type of facility contacted:

*HIV clinic*  
 *Substance use treatment facility*  
 *Needle and syringe exchange program*  
 *Mental health counselor/facility*  
 *Sexual health services*  
 *Social services*  
 *Clinical/medical services*  
 *Legal/judicial*  
 *Other, specify: (Local Language) \_\_\_\_\_ (English) \_\_\_\_\_*

**3** Type of contact:

*In person*  
 *Telephone*  
 *Email/internet*  
 *Text message/SMS*  
 *Other, specify: (Local Language) \_\_\_\_\_ (English) \_\_\_\_\_*

This form documents each contact between HPTN 074 study staff and any referral sites/agencies that are made on the behalf of an index participant. One **Agency Contact** CRF should be submitted for each contact that is made.



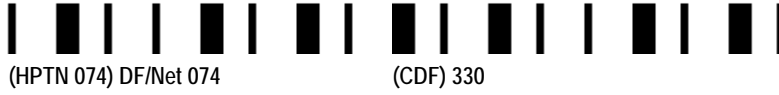

Visit Code:   .

Participant ID:

-      -  -

*Site Number      Network Number      Chk      Cohort*

Initial Specimen Collection Date:

*dd      MMM      yy*

**CD4+ Count and Viral Load**

**1** CD4 + Count:  *Not done/ Not collected*

Alternate Collection Date:

*dd      MMM      yy*

1a. Absolute CD4+:  *Unable to analyze*     *cells/mm3*

**2** HIV-1 RNA PCR:  *Not done/ Not collected*

Alternate Collection Date:

*dd      MMM      yy*

2a. HIV RNA PCR (plasma):  *<*  *=*  *>* *viral copies/mL*         OR  *Undetectable*

2b. RNA PCR kit code:     *kit code*

Comments (*Local language*): \_\_\_\_\_

Comments (*English*): \_\_\_\_\_

This form is to document a participant's CD4+ and Viral Load results as collected per protocol.

**Item-specific Instructions:**

| <b>Initial Specimen Collection Date</b>     | Record the date that the first specimen(s) was collected (not the date results were reported or recorded on the form) for this visit. A complete date is required.                                                                                                                                                                                                                                                                                                                                                                                                                                                                                                                                                                                                                                     |             |      |                        |      |                                             |      |                                             |      |
|---------------------------------------------|--------------------------------------------------------------------------------------------------------------------------------------------------------------------------------------------------------------------------------------------------------------------------------------------------------------------------------------------------------------------------------------------------------------------------------------------------------------------------------------------------------------------------------------------------------------------------------------------------------------------------------------------------------------------------------------------------------------------------------------------------------------------------------------------------------|-------------|------|------------------------|------|---------------------------------------------|------|---------------------------------------------|------|
| <b>Not done/Not collected</b>               | Mark this box in the event that a specimen was not collected, or if the specimen was collected, but a result is not available due to specimen loss or damage.                                                                                                                                                                                                                                                                                                                                                                                                                                                                                                                                                                                                                                          |             |      |                        |      |                                             |      |                                             |      |
| <b>Alternate Collection Date</b>            | This date is to be completed ONLY if the specimen was collected after the Initial Specimen Collection Date for this same visit. A specimen collected for the same visit but on a different day should be recorded on the same form only when obtained within the same visit window. A complete date is required.                                                                                                                                                                                                                                                                                                                                                                                                                                                                                       |             |      |                        |      |                                             |      |                                             |      |
| <b>Results Reporting</b>                    | <ul style="list-style-type: none"> <li>• If a specimen was collected but results are not available because the specimen was lost or damaged, line through the results box(es), provide initials and date, and write an explanation in Comments.</li> <li>• If the site lab does not produce test results in the units used on this form, the results must be converted before the laboratory CRF is faxed to SCHARP. Refer to Study Specific Procedures (SSP) for conversion instructions.</li> <li>• It may be necessary to round the result reported by the lab up or down to the level of precision allowed on the CRF.</li> </ul> <p>If the site lab does not produce test results in the units used on this form, first perform the conversion, then round the converted result if necessary.</p> |             |      |                        |      |                                             |      |                                             |      |
| <b>Item 2a</b>                              | Mark the less than (<), equal to (=), or greater than (>) box as appropriate and record the value. For example, if the value is 3100 copies, mark the equal to (=) box and record "0003100" as the value. If the value reported is < 400 copies, mark the less than (<) box and record "0000400" as the value.                                                                                                                                                                                                                                                                                                                                                                                                                                                                                         |             |      |                        |      |                                             |      |                                             |      |
| <b>Item 2b</b>                              | <p>Record the four-digit RNA PCR kit code from the table below.</p> <table border="1" data-bbox="376 1290 1246 1503"> <thead> <tr> <th data-bbox="376 1290 1011 1346">RNA PCR Kit</th> <th data-bbox="1011 1290 1246 1346">Code</th> </tr> </thead> <tbody> <tr> <td data-bbox="376 1346 1011 1402">Abbott m2000 Real-time</td> <td data-bbox="1011 1346 1246 1402">0406</td> </tr> <tr> <td data-bbox="376 1402 1011 1458">Roche Cobas AmpliPrep/Cobas Tagman Ver. 1.0</td> <td data-bbox="1011 1402 1246 1458">0108</td> </tr> <tr> <td data-bbox="376 1458 1011 1503">Roche Cobas AmpliPrep/Cobas Tagman Ver. 2.0</td> <td data-bbox="1011 1458 1246 1503">0110</td> </tr> </tbody> </table>                                                                                                        | RNA PCR Kit | Code | Abbott m2000 Real-time | 0406 | Roche Cobas AmpliPrep/Cobas Tagman Ver. 1.0 | 0108 | Roche Cobas AmpliPrep/Cobas Tagman Ver. 2.0 | 0110 |
| RNA PCR Kit                                 | Code                                                                                                                                                                                                                                                                                                                                                                                                                                                                                                                                                                                                                                                                                                                                                                                                   |             |      |                        |      |                                             |      |                                             |      |
| Abbott m2000 Real-time                      | 0406                                                                                                                                                                                                                                                                                                                                                                                                                                                                                                                                                                                                                                                                                                                                                                                                   |             |      |                        |      |                                             |      |                                             |      |
| Roche Cobas AmpliPrep/Cobas Tagman Ver. 1.0 | 0108                                                                                                                                                                                                                                                                                                                                                                                                                                                                                                                                                                                                                                                                                                                                                                                                   |             |      |                        |      |                                             |      |                                             |      |
| Roche Cobas AmpliPrep/Cobas Tagman Ver. 2.0 | 0110                                                                                                                                                                                                                                                                                                                                                                                                                                                                                                                                                                                                                                                                                                                                                                                                   |             |      |                        |      |                                             |      |                                             |      |

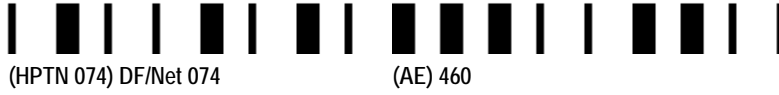

Participant ID:

-     -  -

*Site Number      Network Number      Chk      Cohort*

Date Reported to Site:

*dd      MMM      yy*

**Adverse Experience Log**

|           |                                                                                                            |                                                                                                                                                                                                                                                                                                               |                                                                                                                                                                                                                                                       |
|-----------|------------------------------------------------------------------------------------------------------------|---------------------------------------------------------------------------------------------------------------------------------------------------------------------------------------------------------------------------------------------------------------------------------------------------------------|-------------------------------------------------------------------------------------------------------------------------------------------------------------------------------------------------------------------------------------------------------|
| <b>1</b>  | Adverse Experience (AE): <i>Record diagnosis if available. Include anatomical location, if applicable.</i> |                                                                                                                                                                                                                                                                                                               |                                                                                                                                                                                                                                                       |
| <b>2</b>  | Onset date:                                                                                                | <input type="text"/> <input type="text"/> <input type="text"/> <input type="text"/> <input type="text"/> <input type="text"/>                                                                                                                                                                                 | <i>dd      MMM      yy</i>                                                                                                                                                                                                                            |
| <b>3</b>  | Severity Grade:                                                                                            | <input type="checkbox"/> <i>Grade 1—mild</i> <input type="checkbox"/> <i>Grade 3—severe</i> <input type="checkbox"/> <i>Grade 5—death</i><br><input type="checkbox"/> <i>Grade 2—moderate</i> <input type="checkbox"/> <i>Grade 4—potentially life-threatening</i>                                            |                                                                                                                                                                                                                                                       |
| <b>4</b>  | Relationship to study product:                                                                             | <input type="checkbox"/> <i>Related</i> <input type="checkbox"/> <i>Not related</i> <i>If not related, record rationale or alternative etiology in Comments.</i>                                                                                                                                              |                                                                                                                                                                                                                                                       |
| <b>5</b>  | Study product administration:                                                                              | <input type="checkbox"/> <i>No change</i> <input type="checkbox"/> <i>Held</i> <input type="checkbox"/> <i>Permanently discontinued</i> <input type="checkbox"/> <i>N/A</i>                                                                                                                                   |                                                                                                                                                                                                                                                       |
| <b>6</b>  | Status or Outcome of AE:                                                                                   | <input type="checkbox"/> <i>Continuing</i><br><input type="checkbox"/> <i>Resolved</i><br><input type="checkbox"/> <i>Death</i><br><input type="checkbox"/> <i>Severity/frequency increased (Report as new AE)</i><br><input type="checkbox"/> <i>Continuing at end of study participation</i>                | <b>6a. Status/Outcome Date</b> <i>(Leave blank if Status/Outcome is "continuing".)</i><br><input type="text"/> <input type="text"/> <input type="text"/> <input type="text"/> <input type="text"/> <input type="text"/><br><i>dd      MMM      yy</i> |
| <b>7</b>  | Treatment:<br><i>Mark "none" or all that apply.</i>                                                        | <input type="checkbox"/> <i>None</i> <input type="checkbox"/> <i>Medication(s)</i> <input type="checkbox"/> <i>Procedure/surgery</i><br><i>Comment below.</i><br><input type="checkbox"/> <i>New/prolonged hospitalization</i> <input type="checkbox"/> <i>Other, specify: _____</i><br><i>Comment below.</i> |                                                                                                                                                                                                                                                       |
| <b>8</b>  | Is this an SAE according to ICH guidelines?                                                                | <input checked="" type="checkbox"/> <i>Yes</i> <input type="checkbox"/> <i>No</i>                                                                                                                                                                                                                             |                                                                                                                                                                                                                                                       |
| <b>9</b>  | Has or will this AE be reported as an EAE? (if a SUSAR)?                                                   | <input type="checkbox"/> <i>Yes</i> <input type="checkbox"/> <i>No</i>                                                                                                                                                                                                                                        |                                                                                                                                                                                                                                                       |
| <b>10</b> | At which visit was this AE first reported? <i>Visit code required (regular or interim).</i>                | <input type="text"/> <input type="text"/> . <input type="text"/> <i>visit code</i>                                                                                                                                                                                                                            |                                                                                                                                                                                                                                                       |

Comments (*Local language*): \_\_\_\_\_

Comments (*English*): \_\_\_\_\_

To document Grade 3 or higher Adverse Experience (AE) and only SAEs.

If a cluster of symptoms reported on separate AE Log pages is later attributed to a single diagnosis, change the earliest reported symptom to the final diagnosis. In addition, mark the AE Log pages for the other symptoms with the words "Delete due to diagnosis on AE page #" (specify page number of diagnosis AE).

### Item-specific Instructions:

|                      |                                                                                                                                                                                                                                                                                                                                                                                                                                                                                                                                                                                                                                                                                                                                                                                                                                                                                                                                                                                                                                                                                                                                                                                                                                                                          |
|----------------------|--------------------------------------------------------------------------------------------------------------------------------------------------------------------------------------------------------------------------------------------------------------------------------------------------------------------------------------------------------------------------------------------------------------------------------------------------------------------------------------------------------------------------------------------------------------------------------------------------------------------------------------------------------------------------------------------------------------------------------------------------------------------------------------------------------------------------------------------------------------------------------------------------------------------------------------------------------------------------------------------------------------------------------------------------------------------------------------------------------------------------------------------------------------------------------------------------------------------------------------------------------------------------|
| <b>Page</b>          | Number pages sequentially throughout the study, starting with 001. Do not repeat page numbers. Do not renumber any AE Log pages after faxing, unless instructed by SCHARP.                                                                                                                                                                                                                                                                                                                                                                                                                                                                                                                                                                                                                                                                                                                                                                                                                                                                                                                                                                                                                                                                                               |
| <b>Item 1</b>        | Whenever possible, provide a diagnosis instead of listing a cluster of symptoms. If no diagnosis is identified, each symptom must be recorded on a separate page of the AE Log. If an abnormal lab value is reported, record the lab assay with the direction (i.e., increased or decreased) of the abnormality.                                                                                                                                                                                                                                                                                                                                                                                                                                                                                                                                                                                                                                                                                                                                                                                                                                                                                                                                                         |
| <b>Item 2</b>        | At minimum, month and year are required. Record one of the following, as appropriate: the date on which the participant reports first experiencing the AE; if the AE is discovered during the study visit exam, record the date of the study visit exam; if the AE is an abnormal lab result, record the date on which the specimen was collected.                                                                                                                                                                                                                                                                                                                                                                                                                                                                                                                                                                                                                                                                                                                                                                                                                                                                                                                       |
| <b>Item 3</b>        | Report only Grade 3 or higher AEs and only SAEs. To grade the severity of an AE, consult the <i>Division of AIDS (DAIDS) Table for Grading the Severity of Adult and Pediatric Adverse Experiences</i> .                                                                                                                                                                                                                                                                                                                                                                                                                                                                                                                                                                                                                                                                                                                                                                                                                                                                                                                                                                                                                                                                 |
| <b>Item 4</b>        | Study agent is defined as the participant's current or last known ART and/or opiate substitution therapy. Mark the assessment of the relationship between the AE and the study agent. Mark "related" if there is a reasonable possibility that the AE may be related to the study agent. Mark "not related" if there is not a reasonable possibility that the AE is related to the study agent. If "not related," record an alternative etiology, diagnosis, or explanation in Comments. For more information, refer to the <i>Manual for Expedited Reporting of Adverse Events to DAIDS, Version 2</i> .                                                                                                                                                                                                                                                                                                                                                                                                                                                                                                                                                                                                                                                                |
| <b>Item 5</b>        | <ul style="list-style-type: none"> <li>• <b>No change:</b> Mark if the participant is expected to continue to use study product and the AE does NOT result in a study product hold or permanent discontinuation.</li> <li>• <b>Held:</b> Mark if the AE results in a study product hold. If multiple AEs are reported at the same visit, mark "held" for the AE(s) that contributed to the product hold.</li> <li>• <b>Permanently discontinued:</b> Mark if the AE results in permanent discontinuation of study product. If multiple AEs are reported at the same visit, only mark "permanently discontinued" for the AE that contributed to the permanent discontinuation.</li> <li>• <b>N/A (not applicable):</b> Mark if the AE occurred after the participant had completed all administration of the study product, or the study product is held or permanently discontinued for a different AE or other reason, or the AE is grade 5-death.</li> </ul>                                                                                                                                                                                                                                                                                                           |
| <b>Item 6</b>        | <ul style="list-style-type: none"> <li>• <b>Continuing:</b> AE is continuing at the time it is reported.</li> <li>• <b>Resolved:</b> Condition is no longer present, or returned to the pre-enrollment severity/frequency. If a participant is taking a medication to control an AE that arose during study participation, it is not considered resolved.</li> <li>• <b>Death:</b> Mark only if the severity of this AE is grade 5. Any other AEs continuing at the time of death should be changed to "continuing at end of study participation."</li> <li>• <b>Severity/frequency increased:</b> If an AE increases in severity or frequency after it has been reported on the AE Log, line through the "continuing" box previously marked and mark "severity/frequency increased." Record the date of increase in the "Status/Outcome Date." Report the increase in severity or frequency as a new AE. For this new AE, the "Onset Date" will be the date that the severity or frequency increased. Update EAE form if applicable. Note that decreases in severity should not be recorded as new AEs.</li> <li>• <b>Continuing at end of study participation:</b> Mark this box whenever an AE is continuing at the time of participant study termination.</li> </ul> |
| <b>Item 6a</b>       | At minimum, month and year are required. Record one of the following, as appropriate: the date on which the participant no longer experienced the AE; or the date of the study visit or specimen collection at which the change in status/outcome is first noted.                                                                                                                                                                                                                                                                                                                                                                                                                                                                                                                                                                                                                                                                                                                                                                                                                                                                                                                                                                                                        |
| <b>Item 7</b>        | Indicate all treatments administered for this AE, including treatment provided by a health care professional and participant self-treatment. Do not indicate treatments that were clinically indicated or prescribed but not administered.                                                                                                                                                                                                                                                                                                                                                                                                                                                                                                                                                                                                                                                                                                                                                                                                                                                                                                                                                                                                                               |
| <b>Items 8 and 9</b> | For questions about ICH guidelines and EAE reporting, refer to the <i>Manual for Expedited Reporting of Adverse Events to DAIDS, Version 2</i> .                                                                                                                                                                                                                                                                                                                                                                                                                                                                                                                                                                                                                                                                                                                                                                                                                                                                                                                                                                                                                                                                                                                         |

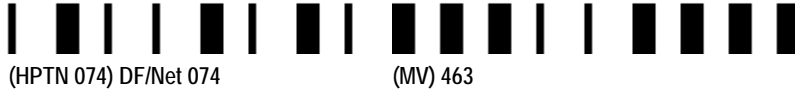

Visit Code:   .

Participant ID:

-      -  -

*Site Number Network Number Chk Cohort*

Form Completion Date:

*dd MMM yy*

**Missed Visit**

**1** Target Visit Date:

*dd MMM yy*

**2** Reason visit was missed. *Mark only one.*

- 2a. Unable to contact participant
- 2b. Unable to schedule appointment(s) within window
- 2c. Participant refused visit
- 2d. Participant incarcerated
- 2e. Participant admitted to a health care facility
- 2f. Participant withdrew from the study → *Complete Termination form.*
- 2g. Participant deceased → *Complete Termination form. Complete Adverse Event Log.*
- 2h. Participant travelled outside the province for work
- 2i. Other, specify: *(Local language)* \_\_\_\_\_  
*(English)* \_\_\_\_\_

Comments (*Local language*): \_\_\_\_\_  
\_\_\_\_\_

Comments (*English*): \_\_\_\_\_  
\_\_\_\_\_

Complete this form whenever an enrolled participant misses a required visit according to the visit window outlined in the protocol or Study-specific Procedures (SSP).

If the QC Report indicates that a visit is overdue, confirm that the visit was missed before completing a Missed Visit form. Fax this form when it is determined that a visit has been missed and cannot be completed within the visit window. Record the Visit Code of the visit that was missed. Record the date that the form was completed. This will not necessarily be the date of the missed visit.

**Item-specific Instructions:**

|               |                                                                   |
|---------------|-------------------------------------------------------------------|
| <b>Item 1</b> | Record the target date of the visit. A complete date is required. |
| <b>Item 2</b> | Record the reason the participant missed the visit.               |

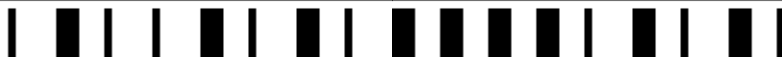

(HPTN 074) DF/Net 074

(TM) 490

Participant ID:

|                    |  |  |                       |  |  |  |            |  |               |  |  |
|--------------------|--|--|-----------------------|--|--|--|------------|--|---------------|--|--|
|                    |  |  |                       |  |  |  |            |  |               |  |  |
| <i>Site Number</i> |  |  | <i>Network Number</i> |  |  |  | <i>Chk</i> |  | <i>Cohort</i> |  |  |

**Termination**

**1** Termination Date: 

|           |  |            |  |  |           |  |  |  |  |  |
|-----------|--|------------|--|--|-----------|--|--|--|--|--|
|           |  |            |  |  |           |  |  |  |  |  |
| <i>dd</i> |  | <i>MMM</i> |  |  | <i>yy</i> |  |  |  |  |  |

*Date the site determined that the participant was no longer in the study.*

**2** Reason for termination. *Mark only one.*

2a. Scheduled exit visit/end of study —————> **End of form.**

2b. Death (Indicate date and cause if known.)

2b1. Date of death: 

|           |  |            |  |  |           |  |  |
|-----------|--|------------|--|--|-----------|--|--|
|           |  |            |  |  |           |  |  |
| <i>dd</i> |  | <i>MMM</i> |  |  | <i>yy</i> |  |  |

**OR**  date unknown

2b2. Cause of death: \_\_\_\_\_ **OR**  cause unknown

*Complete or update Adverse Experience Log.*

2c. Participant refused further participation, specify: \_\_\_\_\_

2d. NOT APPLICABLE FOR THIS PROTOCOL

2e. Participant relocated, no follow-up planned

2f. Investigator decision, specify \_\_\_\_\_

2g. Unable to contact participant

2h. NOT APPLICABLE FOR THIS PROTOCOL

2i. Inappropriate enrollment —————> **End of form.**

2j. Invalid ID due to duplicate screening/enrollment —————> **End of form.**

2k. Other, specify \_\_\_\_\_

2l. Early study closure —————> **End of form.**

2m. Index Termination (Network Partners only) —————> **End of form.**

**3** Was termination associated with an adverse experience?  *yes*  *no*  *don't know* —————> *If no or don't know, end of form.*

3a. Record AE Log page number: 

|               |  |  |
|---------------|--|--|
|               |  |  |
| <i>page #</i> |  |  |

**OR** Specify: *(Local language)* \_\_\_\_\_  
*(English)* \_\_\_\_\_

Comments (*Local language*): \_\_\_\_\_

Comments (*English*): \_\_\_\_\_

This form should be completed for every enrolled participant at either the scheduled exit/end of study visit or when the participant is no longer participating in the study.

**Item-specific Instructions:**

|                 |                                                                                                                                                                                                                                                                                                                               |
|-----------------|-------------------------------------------------------------------------------------------------------------------------------------------------------------------------------------------------------------------------------------------------------------------------------------------------------------------------------|
| <b>Item 1</b>   | Document the date that the participant declares that he/she does not want to continue in the study. If the termination is due to death, indicate the date that the site is notified that the participant is deceased. A complete date is required.                                                                            |
| <b>Item 2</b>   | Mark only the primary reason for termination.                                                                                                                                                                                                                                                                                 |
| <b>Item 2a</b>  | <b>Scheduled exit visit/end of study:</b> Only mark 2a if the participant completes the protocol-defined final visit.                                                                                                                                                                                                         |
| <b>Item 2b1</b> | If date is recorded, at a minimum, the month and year are required.                                                                                                                                                                                                                                                           |
| <b>Item 2l</b>  | <b>Early study closure:</b> Only mark 2l when instructed by SCHARP.                                                                                                                                                                                                                                                           |
| <b>Item 2m</b>  | Only mark item 2m for Network Partners.                                                                                                                                                                                                                                                                                       |
| <b>Item 3a</b>  | Record the page number of the Adverse Experience Log on which the AE was recorded. In situations where more than one AE is associated with termination, record the AE that most strongly influenced the decision to terminate. If termination is associated with a non-reportable AE, record the event on the "specify" line. |



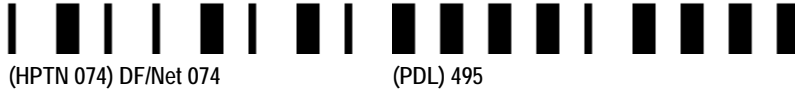

Participant ID:

-      -  -     
*Site Number Network Number Chk Cohort*

Form Completion Date:           
*dd MMM yy*

**Protocol Deviation Log**

|          |                                                                                                                                                                                                                                |          |                                                                                                                                                                                                             |
|----------|--------------------------------------------------------------------------------------------------------------------------------------------------------------------------------------------------------------------------------|----------|-------------------------------------------------------------------------------------------------------------------------------------------------------------------------------------------------------------|
| <b>1</b> | Site awareness date: <input type="text"/> <input type="text"/><br><i>dd MMM yy</i>               | <b>2</b> | Deviation date: <input type="text"/> <input type="text"/><br><i>dd MMM yy</i> |
| <b>3</b> | Has or will this deviation be reported to local IRB/EC? <input type="checkbox"/> <i>Yes</i> <input type="checkbox"/> <i>No</i>                                                                                                 |          |                                                                                                                                                                                                             |
| <b>4</b> | Has or will this deviation be reported to DAIDS as a critical event? <input type="checkbox"/> <i>Yes</i> <input type="checkbox"/> <i>No</i>                                                                                    |          |                                                                                                                                                                                                             |
| <b>5</b> | Type of deviation: <input type="text"/> <input type="text"/> <i>deviation code (See back of form for code listing.)</i>                                                                                                        |          |                                                                                                                                                                                                             |
| <b>6</b> | Description of deviation ( <i>Local language</i> ):<br><hr/> <hr/> Description of deviation ( <i>English</i> ):<br><hr/> <hr/>                                                                                                 |          |                                                                                                                                                                                                             |
| <b>7</b> | Plans and/or action taken to address the deviation ( <i>Local language</i> ):<br><hr/> <hr/> Plans and/or action taken to address the deviation ( <i>English</i> ):<br><hr/> <hr/>                                             |          |                                                                                                                                                                                                             |
| <b>8</b> | Plans and/or action taken to prevent future occurrences of the deviation ( <i>Local language</i> ):<br><hr/> <hr/> Plans and/or action taken to prevent future occurrences of the deviation ( <i>English</i> ):<br><hr/> <hr/> |          |                                                                                                                                                                                                             |
| <b>9</b> | Deviation reported by (staff name): _____                                                                                                                                                                                      |          |                                                                                                                                                                                                             |

## Item-specific Instructions:

|                                         |                                                                                                                                                                                                                                                                                                                                                                                                                                                                                                                                                                                                                                                                                                                                                                                                                                                                                                                                                                                                                                                                |
|-----------------------------------------|----------------------------------------------------------------------------------------------------------------------------------------------------------------------------------------------------------------------------------------------------------------------------------------------------------------------------------------------------------------------------------------------------------------------------------------------------------------------------------------------------------------------------------------------------------------------------------------------------------------------------------------------------------------------------------------------------------------------------------------------------------------------------------------------------------------------------------------------------------------------------------------------------------------------------------------------------------------------------------------------------------------------------------------------------------------|
| <b>Purpose</b>                          | This form documents and reports protocol deviations identified for study participants.                                                                                                                                                                                                                                                                                                                                                                                                                                                                                                                                                                                                                                                                                                                                                                                                                                                                                                                                                                         |
| <b>General Information/Instructions</b> | <ul style="list-style-type: none"> <li>• Consult HPTN 074 Management Group (074mgmt@hptn.org) to confirm whether the event qualifies as reportable deviation.</li> <li>• After confirmed, complete this form each time a protocol deviation is identified.</li> <li>• Reportable protocol deviations are defined by the HPTN as individual incidents, trends or omissions that result in: <ul style="list-style-type: none"> <li>- Significant added risk to the participant</li> <li>- Non-adherence to significant protocol requirements</li> <li>- Significant non-adherence to GCP</li> </ul> </li> <li>• If a deviation needs to be reported but is not associated with a participant (for example, necessary test kits are not available on site), use a PTID that follows the format below on the PDL CRF: <ul style="list-style-type: none"> <li>- XXX-00000-0</li> <li>- Enter your site DataFax ID number in the first 3 digits followed by zeros. Assign page numbers sequentially when completely new PDLs using this PTID.</li> </ul> </li> </ul> |
| <b>Page</b>                             | Number pages sequentially for each participant, starting with 01. Do not re-assign page numbers if a form is marked for deletion.                                                                                                                                                                                                                                                                                                                                                                                                                                                                                                                                                                                                                                                                                                                                                                                                                                                                                                                              |
| <b>Item 2</b>                           | Record the date the event occurred (start date).                                                                                                                                                                                                                                                                                                                                                                                                                                                                                                                                                                                                                                                                                                                                                                                                                                                                                                                                                                                                               |
| <b>Item 5</b>                           | Record the two-digit category code that best describes the type of deviation. Use "99" (other) if none of the listed categories match. Describe the specifics of the deviation in item 6.                                                                                                                                                                                                                                                                                                                                                                                                                                                                                                                                                                                                                                                                                                                                                                                                                                                                      |
| <b>Item 6</b>                           | Briefly describe the specific details of the deviation.                                                                                                                                                                                                                                                                                                                                                                                                                                                                                                                                                                                                                                                                                                                                                                                                                                                                                                                                                                                                        |
| <b>Item 9</b>                           | Record name of site staff person who completed the form.                                                                                                                                                                                                                                                                                                                                                                                                                                                                                                                                                                                                                                                                                                                                                                                                                                                                                                                                                                                                       |

| <b>Code</b> | <b>Description</b>                                                                                                                                                                                                                                               |
|-------------|------------------------------------------------------------------------------------------------------------------------------------------------------------------------------------------------------------------------------------------------------------------|
| <b>01</b>   | <b>Inappropriate enrollment:</b> The participant enrolled and not all eligibility requirements were met.                                                                                                                                                         |
| <b>02</b>   | <b>Failure to follow trial randomization or blinding procedures:</b> Include instances where randomization procedures were not followed by site staff, or product blinding procedures were not followed by pharmacy staff.                                       |
| <b>03</b>   | <b>Study product management deviation:</b> Site staff did not instruct the participant to hold, permanently discontinue, or resume study product use per protocol requirements.                                                                                  |
| <b>04</b>   | <b>Study product dispensing error:</b> The wrong study product was dispensed to a participant, or study product was dispensed to a participant on product hold. Do not include any information related to study product assignment (product codes) on this form. |
| <b>05</b>   | <b>Conduct of non-protocol procedure:</b> A clinical or administrative procedure was performed that was not specified in the protocol, and was not covered under local standard of care practice.                                                                |
| <b>06</b>   | <b>Breach of confidentiality:</b> Include potential and actual cases where participant confidentiality is breached. For example, a staff member puts a participant's name on a case report form.                                                                 |
| <b>07</b>   | <b>Physical assessment deviation:</b> Examples include a protocol-specified exam or assessment consistently not being performed (a single missed exam during one participant visit would not be considered a reportable protocol deviation).                     |
| <b>08</b>   | <b>Lab assessment deviation:</b> Examples include a protocol-specified laboratory assay consistently not being performed (a single missed assay during one participant visit would not be considered a reportable protocol deviation).                           |
| <b>09</b>   | <b>Use of non-IRB/EC-approved materials:</b> Examples include use of ANY study-related material that has not received IRB or EC approval for use per site requirements.                                                                                          |
| <b>10</b>   | <b>Informed assent/consent process deviation:</b> Examples include failure to accurately execute and/or document any part of the informed consent process.                                                                                                       |
| <b>99</b>   | <b>Other</b>                                                                                                                                                                                                                                                     |

Participant ID:

7 ptid

Form Completion Date: 8 Date

Site Number Network Number Chk Cohort

dd / DEMstid / 1 / 1

Demographics

9 DEMstid

Thank you for being a part of our research. People live in different places, with different customs, cultures, sexual practices and beliefs. We hope to include people from different communities in our research. We respect all people, regardless of their differences. Not all questions we ask in our research will apply to you. Because we do not want to make assumptions, we ask the same questions of everyone. We want you to be comfortable in speaking with us. You do not have to answer any question that makes you uncomfortable.

Now I am going to ask you some questions about yourself. The answer to these questions will tell us more about who you are, such as your age and ethnicity (what cultural group you come from). I will also ask you about your sex and gender. Please feel free to ask any questions about things that you don't understand.

1 What is your date of birth? 10 DEMbthdt OR If unknown, record age: 11 DEMAge

2 What is your sex at birth? 12 DEMsex Male Female

3 How do you identify your gender? Mark all that apply. 13 DEMgenm Male 14 DEMgenf Female 15 DEMgeno Other, specify. Local language: English: 16 DEMgenox

4 Are you currently a student? 17 DEMcs Yes No

Version InitDate 1

Version 18 19 VersDt

20 formlang

Completed by: 21 InitDate (initials/date)

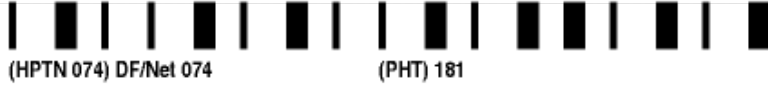

Visit Code: 6 visit

Participant ID:

7 ptid

Site Number Network Number Chk Cohort

Header [ 1 ]

### Partner HIV Test Results

#### HIV TEST RESULTS

|   |                                                            |                                       |               |                                                    |                                                                                                                 |
|---|------------------------------------------------------------|---------------------------------------|---------------|----------------------------------------------------|-----------------------------------------------------------------------------------------------------------------|
| 1 | Specimen #1 Collection Date:                               | 8 PHTcdt<br><small>dd MMM yy</small>  | OR            | 9 PHTnd<br><small>Not done/ Not collected</small>  | If not done/not collected at a visit where HIV testing is required by the protocol, provide reason in Comments. |
|   | 1a. Were any of the HIV test results positive or Reactive? | 10 PHTpos                             | No            |                                                    |                                                                                                                 |
| 2 | Specimen #2 Collection Date:                               | 11 PHTcdt<br><small>dd MMM yy</small> | OR            | 12 PHTnd<br><small>Not done/ Not collected</small> | If not done/not collected at a visit where HIV testing is required by the protocol, provide reason in Comments. |
|   | 2a. Were any of the HIV test results positive or Reactive? | 13 PHTpos                             | No            |                                                    |                                                                                                                 |
| 3 | Final HIV Status:                                          | 14 PHTfinal                           | Indeterminate |                                                    |                                                                                                                 |

Comments (Local language): \_\_\_\_\_

Comments (English): 15 PHTcomm

/ersionInitDate [ 1 ]

Version 16 17 VersDt

18 formlang Completed by: 19 InitDate (initials/date)

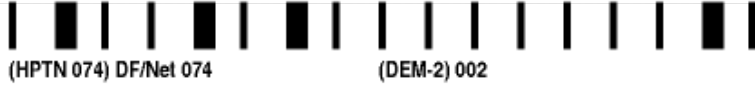

6 visit

Participant ID:

7 ptid

Site Number Network Number Chk Cohort

Header [ 1 ]

Demographics

Page 2 of 4

5 What is the highest level of education you have completed?

- No schooling
- Primary school, not complete
- Primary school, complete
- Secondary school, not complete
- Secondary school, complete
- Technical training, not complete
- Technical training, complete
- College or university, not complete
- College or university, complete

8 DEMedu

6 What is your relationship status? Are you:

- Married
- Living with a sexual partner but not married
- Separated
- Divorced
- Widowed
- Single
- Refuse to answer

9 DEMmar

7 Have you been homeless at any time in the last 6 months?

- Yes
- No

10 DEMhl6mo

/ersionInitDate [ 1 ]

Version 3 11 12 VersDt

13 formlang Completed by: 14 InitDate (initials/date)

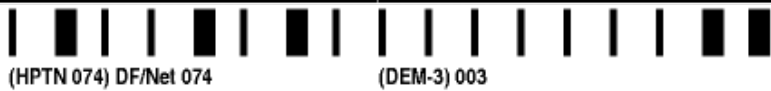

(HPTN 074) DF/Net 074

(DEM-3) 003

6 visit

Participant ID:

7 ptid

Site Number Network Number Chk Cohort

Header [ 1 ]

Demographics

Page 3 of 4

8 How would you describe your current living situation? Mark all that apply. Demographics [ 1 ]

- 8 DEMIshor 8a. Live in a house that I own or rent
- 9 DEMIspar 8b. Live in parent's home
- 10 DEMIsrel 8c. Live in other relative's home (e.g. sibling, cousin, aunt and/or uncle)
- 11 DEMIsrnt 8d. Rent a room or space in someone else's house or apartment
- 12 DEMIsfre 8e. Stay with someone else for free (don't pay regular room and board)
- 13 DEMIsst 8f. Live on the street, in a park, alley or abandoned building
- 14 DEMIshlt 8g. Live in a homeless shelter
- 15 DEMIsdif 8h. Stay at more than two different places a week
- 16 DEMIstrn 8i. Live in a drug recovery or any transitional house
- 17 DEMIsref 8j. Refuse to answer
- 18 DEMIso 8k. Other place, specify:

Local language:

19 DEMIsox

English:

9 Who lives with you? Mark all that apply.

- 20 DEMIvspo 9a. Spouse/partner/girl-boyfriend
- 21 DEMIvch 9b. Own children
- 22 DEMIvpar 9c. Parents
- 23 DEMIvfam 9d. Other family members
- 24 DEMIvfr 9e. Friends
- 25 DEMIvoth 9f. Others (e.g., roommates, tenants)
- 26 DEMIvalo 9g. Live alone
- 27 DEMIvref 9h. Refuse to answer

/ersionInitDate [ 1 ]

Version: 28 29 VersDt

30 formlang

Completed by: 31 InitDate (initials/date)

Participant ID:

7 ptid

Site Number Network Number Chk Cohort

Header [ 1 ]

Demographics

Page 4 of 4

10 At any time during the past 3 months, have you been unemployed?

Demographics [ 1 ]

- Yes
- 8 DEMun3mo
- Refuse to answer

11 Which of the following best describes your current employment status? Are you:

- Employed full-time
- Employed part-time
- 9 DEMemp  Unemployed but seeking work
- Unemployed—not seeking work
- Retired
- Refuse to answer

12 In the past month, how many days have you been working for pay?

10 DEMwrkdy # days

Version InitDate [ 1 ]

Version 3 11 12 VersDt

13 formlang Completed by: 14 InitDate (initials/date)

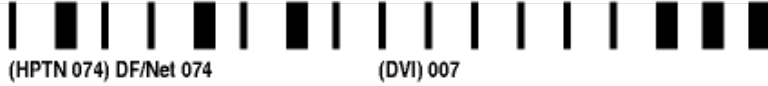

(HPTN 074) DF/Net 074

(DVI) 007

6 visit

Participant ID:

7 ptid

Form Completion Date:

8 Date

Site Number Network Number Chk Cohort

dd /mm/yyyy Header [ 1 ]

Demographics - Vietnam

1 What does the participant report as his/her ethnicity/nationality? Mark all that apply.

Demographics [ 1 ]

9 DVIkinh

10 DVItay

11 DVInung

12 DVIandi

13 DVIhmong

14 DVIsanch

15 DVIhoa

16 DVIdao

17 DVIcaola

18 DVIngai

19 DVIthai

20 DVIoth

Local language:

English:

21 DVIothx

VersionInitDate [ 1 ]

Version 1 22 23 VersDt

24 formlang Completed by: 25 InitDate (initials/date)



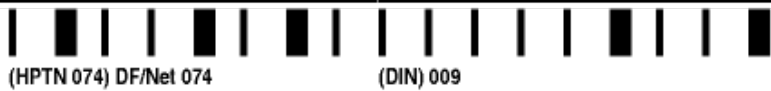

(HPTN 074) DF/Net 074

(DIN) 009

6 visit

Participant ID:

7 ptid

Form Completion Date:

8 Date

Site Number Network Number Chk Cohort

dd /mm/yy Header [ 1 ]

### Demographics - Indonesia

1 What does the participant report as his/her ethnicity/nationality? *Mark all that apply.*

Demographics [ 1 ]

9 DINbetaw

10 DINjawa

11 DINsunda

12 DINminan

13 DINbatak

14 DINbugis

15 DINambon

16 DINtiang

17 DINoth

Local language:

English:

18 DINothx

/ersionInitDate [ 1 ]

Version

19 20 VersDt

21 formlang

Completed by:

22 InitDate (initials/date)

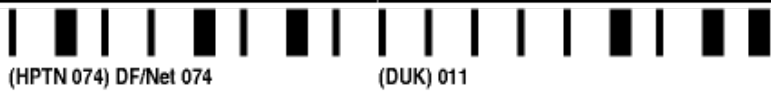

6 visit

Participant ID:  Form Completion Date:

Site Number    Network Number    Chk    Cohort    dd    mm    yy

Header [ 1 ]

### Demographics - Ukraine

1 What does the participant report as his/her ethnicity/nationality? *Mark all that apply.* Demographics [ 1 ]

9 DUKukrai 12. Ukrainian

10 DUKrussi 13. Russian

11 DUKoth 14. Other, specify: Local language:

English:

Version InitDate [ 1 ]

Version    Completed by:  (initials/date)

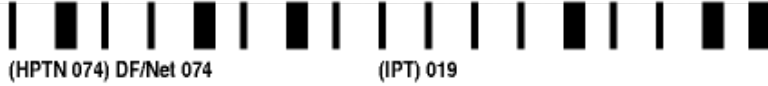

6 visit

Participant ID:

7 ptid

Screening Visit Date: 8 Date

Site Number Network Number Chk Cohort

dd /MM/YY Header [ 1 ]

### Index PTID Tracker

1 Was the participant's identity checked (e.g. fingerprint, unique identification card, etc.)?

9 IPTidck No

If yes, go to item 2.

1a. If no, reason:

10 IPTidx

2 Has this participant been seen before for HPTN 074?

11 IPTprev No

If no, end of form.

2a. List all prior PTIDs associated with this participant:

Site Number Network Number Chk Cohort

PTID #1: 12 IPTptid1

PTID #4: 15 IPTptid4

PTID #2: 13 IPTptid2

PTID #5: 16 IPTptid5

PTID #3: 14 IPTptid3

VersionInitDate [ 1 ]

Version 1 17 18 VersDt

19 formlang

Completed by: 20 InitDate (initials/date)

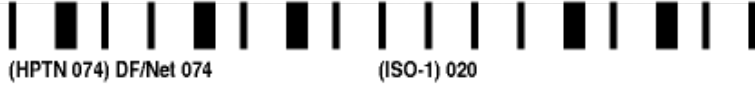

6 visit

Participant ID:

7 ptid

Screening Visit Date: 8 Date

Site Number Network Number Chk Cohort

dd / / Header [ 1 ]

Index Screening Outcome

Page 1 of 2

1 Did the participant agree to have samples of blood collected at screening stored and used for future testing related to HIV infection? ScreeningOutc [ 1 ]

9 ISObsam Yes No

2 How was this participant recruited? Mark all that apply.

- 10 ISOrdi 2b. From another drug injector
11 ISOrrpart 2b. From an HPTN 074 participant
12 ISOrdnet 2c. From a drug user outside of their network
13 ISOrrsoc 2d. Social media (e.g., Facebook) or other internet
14 ISOrrpnt 2e. Print media
15 ISOrrmedi 2f. TV or radio media
16 ISOrrharm 2g. Harm reduction sites/center
17 ISOrrhot 2h. Hot spots
18 ISOrrhivc 2i. HIV clinics
19 ISOrrmatc 2j. MAT clinics
20 ISOrrdloc 2k. Drug sales locations
21 ISOrroutr 2l. Outreach
22 ISOrroth 2m. Other, specify:

Local language: 23 ISOrothx English:

3 Did the participant enroll in the study?

24 ISOenr Yes No If yes, end of form. Do not submit page 2.

VersionInitDate [ 1 ]

Version 2 25 26 VersDt

27 formlang Completed by: 28 InitDate (initials/date)

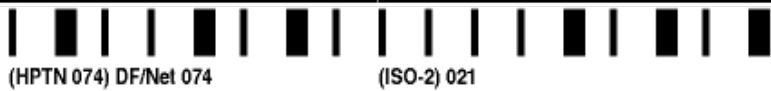

6 visit

Participant ID:

7 ptid

Site Number Network Number Chk Cohort

Header [ 1 ]

Index Screening Outcome

Page 2 of 2

4 Why was the participant not enrolled in the study? Mark all that apply.

ScreeningOutc [ 1 ]

- 8 ISOnacti 4a. Current participation in an HIV prevention study or previous/current participation in an HIV vaccine study
- 9 ISOnmed 4b. Serious and active medical or mental illness
- 10 ISOnscrp 4c. Previously screened as a potential network partner of another index participant in this study
- 11 ISOnpart 4d. Currently or previously a partner of an index participant
- 12 ISOnadh 4e. Unwilling to adhere to study procedures
- 13 ISOnref 4f. Withdrew consent/refused to participate
- 14 ISOnunab 4g. Unable to recruit network partner within window after screening blood draw
- 15 ISOnvl 4h. Viral load < 1,000 copies/mL
- 16 ISOncrit 4i. Does not meet the criteria for active injection drug user per protocol
- 17 ISOnhivp 4j. Not HIV positive
- 18 ISOnshar 4k. Does not report sharing needles/syringes or drug solutions at least once in the last month
- 19 ISOnscrn 4l. Did not complete screening procedures
- 20 ISOnoth 4m. Other, specify: \_\_\_\_\_

Local language: \_\_\_\_\_

English:

21 ISOnothx

/ersionInitDate [ 1 ]

Version 2 22 23 VersDt

24 formlang

Completed by: 25 InitDate (initials/date)

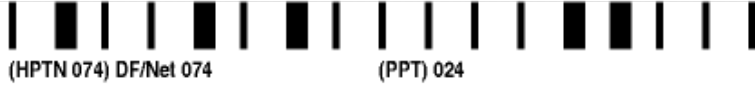

6 visit

Participant ID:

7 ptid  
Site Number Network Number Chk Cohort

Screening Visit Date: 8 Date  
dd

Header [ 1 ]

### Partner PTID Tracker

PartnerTracker [ 1 ]

1 Was the participant's identity checked (e.g. fingerprint, unique identification card, etc.)?

9 PPTidck No

If yes, go to item 2.

1a. If no, reason: 10 PPTidx

2 Has this participant been seen before for HPTN 074?

11 PPTprev No

If no, end of form.

2a. List all prior PTIDs associated with this participant:

|          | <small>Site Number</small> | <small>Network Number</small> | <small>Chk</small> | <small>Cohort</small> |          | <small>Site Number</small> | <small>Network Number</small> | <small>Chk</small> | <small>Cohort</small> |
|----------|----------------------------|-------------------------------|--------------------|-----------------------|----------|----------------------------|-------------------------------|--------------------|-----------------------|
| PTID #1: | 12 PPTptid1                |                               |                    |                       | PTID #4: | 15 PPTptid4                |                               |                    |                       |
| PTID #2: | 13 PPTptid2                |                               |                    |                       | PTID #5: | 16 PPTptid5                |                               |                    |                       |
| PTID #3: | 14 PPTptid3                |                               |                    |                       |          |                            |                               |                    |                       |

VersionInitDate [ 1 ]

Version 1 17 18 VersDt

19 formlang Completed by: 20 InitDate (initials/date)

(HPTN 074) DF/Net 074

(PSO) 025

6 visit

Participant ID:

7 ptid

Screening Visit Date:

8 Date

Site Number Network Number Chk Cohort

dd /mm/yy Header [ 1 ]

Partner Screening Outcome

1 Did the participant agree to have samples of blood collected at screening stored and used for future testing related to HIV infection? ScreeningOutc [ 1 ]

9 PSObSam Yes No

2 Did the participant enroll in the study?

10 PSOoenr Yes No If yes, end of form.

3 Why was the participant not enrolled in the study? Mark all that apply.

- 11 PSOnhiyn 3a. Any reactive or positive HIV rapid or HIV EIA test
12 PSOnacti 3b. Current participation in an HIV prevention study or previous/current participation in an HIV vaccine study
13 PSOnmed 3c. Serious and active medical or mental illness
14 PSOnscrip 3d. Previously screened as a potential network member of another index participant in this study
15 PSOnpart 3e. Previously named and enrolled as a partner of another index partner
16 PSOnadh 3f. Unwilling to adhere to study procedures
17 PSOnref 3g. Withdrew consent/refused to participate
18 PSOncrit 3h. Does not meet the criteria for active injection drug user per protocol
19 PSOnrel 3i. Could not confirm injection relationship with index
20 PSOnscrip 3j. Did not complete screening procedures
21 PSOnoth 3k. Other, specify: Local language: English:

22 PSOnothx

/ersionInitDate [ 1 ]

Version: 23 24 VersDt

25 formlang Completed by: 26 InitDate (initials/date)

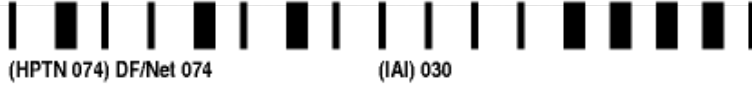

Visit Code: 6 visit

Participant ID:

7 ptid

Visit Date: 8 Date

Site Number Network Number Chk Cohort

dd / M / yyyy Header [ 1 ]

Index ART Initiation

ARTInitiation [ 1 ]

1 When did the participant indicate that s/he had initiated ART? 9 IAIindt

dd / MMM / yy

2 How was ART use determined? Mark all that apply.

10 IAIartsr 2a. Participant self-report

11 IAIactr 2b. Outside clinic report/documentation

12 IAIarto 2c. Other, specify: Local language:

English: 13 IAIartx

3 Is the participant willing/able to provide documentation?

14 IAIpdoc Yes No -> If no, end of form.

4 Record ART medications prescribed for the participant:

Table with columns: ART Medication Code, Date Started (dd / MMM / yy). Rows 4a-4e with fields 15-24 IAImed, IAImdt.

Comments (Local language):

Comments (English): 25 IAIcomm

/ersionInitDate [ 1 ]

Version 1 26, 27 VersDt

28 formlang Completed by: 29 InitDate (initials/date)



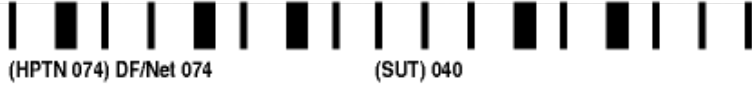

Visit Code: 6 visit

Participant ID:

7 ptid  
Site Number Network Number Chk Cohort

Visit Date: 8 Date  
dd MMM yy

Header [ 1 ]

Substance Use Treatment Initiation

SubstanceUse [ 1 ]

1 When did the participant indicate that s/he had initiated substance use treatment? 9 SUTtxdt  
dd MMM yy

2 How was substance use treatment determined? Mark all that apply.  
10 SUTdself 2a. Participant self-report  
11 SUTdouts 2b. Outside clinic report/documentation  
12 SUTdoth 2c. Other, specify: Local language: English: 13 SUTdothx

3 Is the participant willing/able to provide details about his/her substance use treatment?  
14 SUTdetls No → If no, end of form.

4 Record the types of substance use treatment the participant is involved in.  
If yes, date of most recent visit:  
Yes No dd MMM yy  
4a. Methadone 15 SUTmmt 24 SUTmmtdt  
4b. Buprenorphine 16 SUTbup 25 SUTbupdt  
4c. Other medication (MAT), specify: 17 SUTomat 26 SUTomadt  
Local Language: English: 21 SUTomatx  
4d. Detoxification 18 SUTdetox 27 SUTdtxdt  
4e. Community treatment/religious, specify: 19 SUTct 28 SUTctdt  
Local Language: English: 22 SUTctx  
4f. Other specify: 20 SUToth 29 SUTothdt  
Local Language: English: 23 SUTothx

Comments (Local language): 30 SUTcomm  
Comments (English):

VersionInitDate [ 1 ]

Version 2 31 32 VersDt 33 formlang Completed by: 34 InitDate (initials/date)

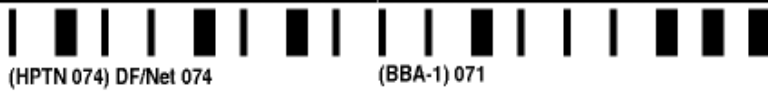

6 visit

Participant ID:

7 ptid

Assessment Date:

8 Date

Site Number Network Number Chk Cohort

dd MMM Header [ 1 ]

### Baseline Behavior Assessment

Page 1 of 8

A broad range of participants are taking part in this study. So some questions may not apply to you. We ask the same questions of all participants.

In this interview, you will be asked about your sexual behaviors and possible alcohol and drug use. Some of the questions may seem very personal. Please remember that all of your answers will be kept private. Your responses are linked only to your study number, not to your name.

**We need you to answer these questions honestly.** We do not judge about alcohol or drug use. We make no judgments about how you have sex or the number of times or with whom.

These questions help us understand the type of behaviors our participants are doing while on study. Your honesty will help us understand these differences in behaviors.

#### HIV TESTING HISTORY

1 Prior to participating in this study, did you ever have an HIV test?

9 BBAhivt No **aseBehavAssess [ 1**   
 If no, go to item 2.

1a. How many times have you had an HIV test in your lifetime?

10 BBAhivnm # of times

1b. When was your most recent HIV test?

11 BBAhivdt   
 dd MMM yy

1c. What was the result of that test?

12 BBAhivr Don't know

#### INCARCERATION

2 In the last 3 months, how many different times were you in...

2a. Jail/prison?

13 BBAjail # of times

2b. Involuntary detoxification/detention?

14 BBAdetox # of times

2c. Other incarceration, specify:

15 BBAoinc # of times

Local language: \_\_\_\_\_

English: 16 BBAoincx

/ersionInitDate [ 1

Version 2 17 18 VersDt

19 formlang

Completed by: 20 InitDate (initials/date)

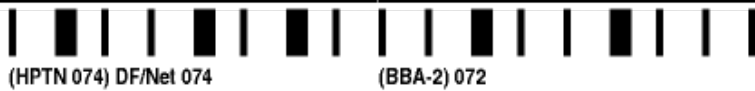

6 visit

Participant ID:

Site Number      Network Number      Chk      Cohort

Header [ 1 ]

**Baseline Behavior Assessment** Page 2 of 8

**ALCOHOL USE (Audit C)** Answer questions to reflect your behavior over the past 3 months.

**3** How often do you have a drink containing alcohol? aseBehavAssess [ 1 ]

2-3 times a week  
4 or more times a week

**4** How many standard drinks containing alcohol do you have on a typical day?

7 to 9  
10 or more

**5** How often do you have six or more drinks on one occasion?

Weekly  
Daily or almost daily

**NON-INJECTION DRUG USE**

**6** In the last 3 months, did you... Yes No

6a. Use marijuana?

6b. Use stimulants (cocaine, methamphetamines)?

6c. Use opiates (heroin, opium)?

6d. Use other drugs (as indicated by sites), specify:

Local language: \_\_\_\_\_

English:

**7** When was the last time you used marijuana, amphetamines, methadone, opiates or benzodiazepines that you did not inject?  OR

dd      MMM      yy

Version 2   VersDt  formlang Completed by:  InitDate (initials/date)

(HPTN 074) DF/Net 074

(BBA-3) 073

6 visit

Participant ID:

7 ptid

Site Number Network Number Chk Cohort

Header [ 1 ]

Baseline Behavior Assessment

Page 3 of 8

INJECTION DRUG USE

aseBehavAssess [ 1 ]

8 How old were you when you first injected drugs?  years

9 What is the longest time you have not injected drugs, voluntarily (e.g. when you were not incarcerated), since you started using injection drugs?  
 months  days  years

10 In the last 3 months, which of the following did you inject?

|                       | Yes                                      | No |                                                  | Yes                                     | No |
|-----------------------|------------------------------------------|----|--------------------------------------------------|-----------------------------------------|----|
| 10a. Amphetamines     | <input type="text" value="12 BBAiamp"/>  |    | 10i. Ketamine                                    | <input type="text" value="20 BBAiket"/> |    |
| 10b. Methamphetamines | <input type="text" value="13 BBAimamp"/> |    | 10j. Homemade opioids                            | <input type="text" value="21 BBAihop"/> |    |
| 10c. Cocaine          | <input type="text" value="14 BBAicoc"/>  |    | 10k. Short and long action stimulants            | <input type="text" value="22 BBAisas"/> |    |
| 10d. Heroin           | <input type="text" value="15 BBAiher"/>  |    | 10l. Dezomorphine                                | <input type="text" value="23 BBAidez"/> |    |
| 10e. Opium            | <input type="text" value="16 BBAiop"/>   |    | 10m. Other, specify:                             | <input type="text" value="24 BBAioth"/> |    |
| 10f. Buprenorphine    | <input type="text" value="17 BBAibup"/>  |    | Local language: _____                            |                                         |    |
| 10g. Methadone        | <input type="text" value="18 BBAimeth"/> |    | English: <input type="text" value="25 BBAiotx"/> |                                         |    |
| 10h. Benzodiazepines  | <input type="text" value="19 BBAibenz"/> |    |                                                  |                                         |    |

11 In the last month, on how many days did you inject drugs?  # of days

12 In the last month, on days that you injected, how many times a day did you usually inject drugs?  # of times a day

13 When was the last day you injected (including today)?  OR  # of months ago  
dd MMM yy

/ersionInitDate [ 1 ]

Version:

Completed by:  (initials/date)

Participant ID:

7 ptid

Site Number Network Number Chk Cohort

Header [ 1 ]

Baseline Behavior Assessment

SHARING

Often people share syringes and other equipment because they are in a rush, they are concerned about the police, feeling sick or for a variety of other reasons.

Yes No Don't know

aseBehavAssess [ 1 ]

14 Have you shared rinse water in the last 3 months?

8 BBAsrw

If no, go to item 15. ←

14a. The last time you injected, did you share rinse water?

9 BBAsrwls

15 Have you shared a cooker/container in the last 3 months?

10 BBAscc

If no, go to item 16. ←

15a. The last time you injected, did you share a cooker/container?

11 BBAscccls

16 Have you shared filter cotton in the last 3 months?

12 BBAsfc

If no, go to item 17. ←

16a. The last time you injected, did you share filter cotton?

13 BBAsfcls

CLEANING

17 How often do you clean your needle before injecting?

14 BBAClnf Never

Yes No Don't know

18 The last time you injected, did you clean the needle before you injected?

15 BBAndlc

19 The last time you injected, did you use a new needle?

16 BBAndln

20 How often do you clean your needle after injecting?

17 BBAClna Never

Yes No Don't know

21 The last time you injected, did you clean the needle after you injected?

18 BBAClnls

/ersionInitDate [ 1 ]

Version 19, 20 VersDt

21 formlang

Completed by: 22 InitDate (initials/date)

(HPTN 074) DF/Net 074

(BBA-5) 075

6 visit

Participant ID:

7 ptid

Site Number Network Number Chk Cohort

Header [ 1 ]

Baseline Behavior Assessment

Page 5 of 8

PRE-FILLING AND BACKLOADING SYRINGES

aseBehavAssess [ 1

22 The last time you injected, did you use a pre-filled syringe? 8 BBApfs Don't know

23 The last time you injected, did you inject drugs that were frontloaded or backloaded into the syringe or needle that you used? 9 BBAfbs Don't know

24 In the last 3 months, how many different people did you use injection drugs with? 10 BBApeop # of people -> If 000, go to item 30.

25 In the last 3 months, how many times did you even once pass on a needle or syringe to someone else after you used it? 11 BBApass # of times -> If 000, go to item 27.

26 In the last 3 months, with how many different people did you pass on a needle or syringe after you had used it? 12 BBApassn # of people

27 In the last 3 months, how many times did you ever, even once, use a needle or syringe after someone else used it? 13 BBAused # of times -> If 000, go to item 29.

28 In the last 3 months, with how many different people did you use a needle or syringe after someone else used it? 14 BBAusedn # of people

29 In the past 3 months, when you shared syringes, how often did you inject last? 15 BBAilast Sometimes I have not shared in the past 3 months

30 In the last 3 months, did you get your new needles/syringes from a... 30a. 16 BBAnew I did not get new needles in the last 3 months -> Go to item 32 on page 6.

Yes No

30b. Pharmacy or health center? 17 BBApharm

30c. Needle seller? 18 BBAseplr

30d. Needle exchange? 19 BBAnexch

30e. Other drug injectors? 20 BBAodinj

30f. Other, specify? 21 BBAosrc

Local language: English: 22 BBAosrcx

VersionInitDate [ 1

Version 2 23 24 VersDt

25 formlang Completed by: 26 InitDate (initials/date)

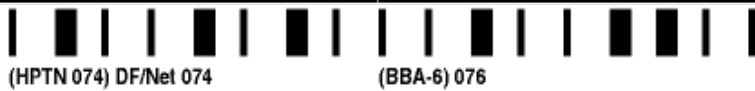

6 visit

Participant ID:  
7 ptid  
Site Number Network Number Chk Cohort

Header [ 1 ]

Baseline Behavior Assessment

PRE-FILLING AND BACKLOADING SYRINGES

aseBehavAssess [ 1

31 In the last 3 months, when you obtained new needles, typically, how many did you buy at one time? 8 BBAbuy # of needles

DRUG TREATMENT PROGRAMS Indicate which types of treatment you have participated in.

32 Have you ever participated in any type of drug treatment program? 9 BBAtx No -> If no, go to item 36 on page 7.

33 Methadone maintenance or any other medication assisted treatment program (MMT/MAT)? 10 BBAmat No -> If no, go to item 34 on page 7.

33a. What type of MMT/MAT program have you been on? Mark all that apply.

11 BBAtmeth 33a1. Methadone

13 BBAtoth 33a2. Other, specify: (Local language)

12 BBAtbup 33a2. Buprenorphine

14 BBAtothx (English)

33b. How many times have you enrolled in MMT/MAT? 15 BBAmat # of times

33c. What is the longest period of time you have been in MMT/MAT? 16 BBAmatm months 17 BBAmatd days

33d. Have you participated in MMT/MAT in the last 3 months? 18 BBAmat3m No -> If no, go to item 34 on page 7.

33e. What type of MMT/MAT program have you been on in the last 3 months? Mark all that apply.

19 BBAtm3m 33e1. Methadone

21 BBAto3m 33e2. Other, specify: (Local language)

20 BBAtb3m 33e2. Buprenorphine

22 BBAto3mx (English)

33f. Are you currently in MMT/MAT? 23 BBAmatc No -> If yes, complete the Substance Use Treatment Initiation CRF.

/ersionInitDate [ 1

Version: 24 25 VersDt

26 formlang

Completed by: 27 InitDate (initials/date)

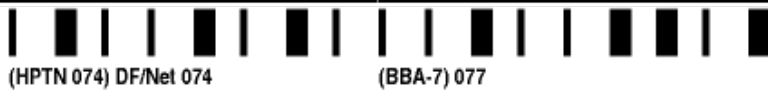

6 visit

Participant ID:

7 ptid

Site Number Network Number Chk Cohort

Header [ 1 ]

Baseline Behavior Assessment

Page 7 of 8

DRUG TREATMENT PROGRAMS

aseBehavAssess [ 1

34 A health care provider supported drug detoxification program?  No → If no, go to item 35.

34a. How many times have you enrolled in detoxification?  # of times

34b. What is the longest period of time you have been in detoxification?  months  days

34c. Have you participated in detoxification in the last 3 months?  No → If no, go to item 35.

34d. Are you currently in detoxification?  No

35 Any type of other drug treatment program (e.g. community treatment/religious)?  No → If no, go to item 36.

35a. How many times have you enrolled in any other type of drug treatment?  # of times

35b. What is the longest period of time you have been in this type of program?  months  days

35c. Have you participated in this type of program in the last 3 months?  No → If no, go to item 36.

35d. Are you currently in this type of program?  No

SEXUAL BEHAVIOR QUESTIONS

The next few questions are about sexual behavior. These are very personal questions. Please remember that all the information you give us is confidential. We ask that you answer the questions as honestly as you can.

36 In the last 3 months, did you have vaginal or anal sex?  No → If no, go to item 42 on page 8.

37 In the last month, how many different female sex partners have you had?  # of female sex partners

38 In the last month, how many different male sex partners have you had?  # of male sex partners

/ersionInitDate [ 1

Version 23 24 VersDt

25 formlang

Completed by: 26 InitDate (initials/date)



Participant ID:

7 ptid

Site Number Network Number Chk Cohort

Header [ 1 ]

Baseline Behavior Assessment

aseBehavAssess [ 1

39 Do you have a main partner such as a husband/wife or boyfriend/girlfriend? 8 BBAmpp No -> If no, go to item 41.

39a. Is your main partner male or female?

9 BBAmppgen Other, specify: (Local language) 10 BBAmppgnx (English)

40 In the last month, how many times did you have vaginal or anal sex with your main partner? 11 BBAsexmp # of times -> If 000, go to item 41.

40a. How many of these times did you (or your partner) use a condom? 12 BBAmppcon # of times

41 In the last month, how many times did you have vaginal or anal sex with someone other than a main partner? 13 BBAsexop # of times -> If 000, go to item 42.

41a. How many of these times did you (or your partner) use a condom? 14 BBAopcon # of times

Next I am going to ask about your sex trade (paid or paying) partners. By sex trade partners, I mean people that you had oral, vaginal or anal sex with in exchange for money, drugs, food or a place to stay.

42 In the last month, how many times did you give sex partners money or drugs in exchange for sex? 15 BBAexchy # of times

43 In the last month, how many times did a sex partner give you money or drugs in exchange for sex? 16 BBAexchp # of times

/ersionInitDate [ 1

Version 17 18 VersDt

19 formlang

Completed by: 20 InitDate (initials/date)

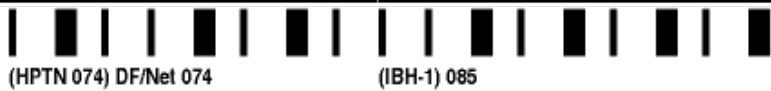

(HPTN 074) DF/Net 074

(IBH-1) 085

6 visit

Participant ID:

7 ptid

Assessment Date:

8 Date

Site Number Network Number Chk Cohort

dd MMM Header [ 1 ]

Index Baseline HIV Care and ART

Page 1 of 6

The next few questions are about anti-HIV medicines called antiretroviral therapy that you may be taking. These questions are not about drugs you may be taking to treat substance use. We need to know what is really happening, not what you think we "want to hear." Many people find it hard to take their medications all of the time.

IndexBaselineHIV [ 1

1 When did you first find out that you were HIV positive?

9 IBHhivdt
dd MMM yy

2 With whom have you shared that you are living with HIV? Mark all that apply.

- 10 IBHspous 2a. Spouse/partner/girl-boyfriend
11 IBHchild 2b. Own children
12 IBHparen 2c. Parents
13 IBHofm 2d. Other family members
14 IBHfrnds 2e. Friends
15 IBHsboth 2f. Others
16 IBHnoone 2g. No one
17 IBHref 2h. Refuse to answer

3 How many of your drug partners (the people you inject drugs with) know that you have HIV?

- All of my partners
More than half of my partners
18 IBHptnr
Less than half of my partners
None of my partners

VersionInitDate [ 1

Version: 19 20 VersDt

21 formlang

Completed by: 22 InitDate (initials/date)

(HPTN 074) DF/Net 074

(IBH-2) 086

6 visit

Participant ID:

7 ptid

Site Number Network Number Chk Cohort

Header [ 1 ]

Index Baseline HIV Care and ART

Page 2 of 6

4 Who is the most supportive in helping you with your HIV care and treatment?

IndexBaselnHIV [ 1 ]

- Health care providers (such as doctors or nurses)
- Your spouse/live-in partner/long-term partner
- Casual sexual partner (i.e., friends or associates who you just met and had sex with)
- Injecting partners
- Commercial sex workers
- Your mother and father
- 8 IBHsupport
- Other family members
- Priests/religious leaders
- Your neighbors or community members
- Friends
- Your employers
- Other, specify: (Local language)

(English)

9 IBHsothx

5 How often have you talked to your family or support person about your HIV medications?

10 IBHtalk

One time

Never

6 Since you found out you were living with HIV, have you seen an HIV clinician?

11 IBHcln

No

If no, go to item 8 on page 3.

dd MMM yy

6a. If yes, on what date was your most recent visit?

12 IBHclndt

7 Has any HIV clinician ever told you that you should initiate ART treatment for your own health?

13 IBHainit

No

/ersionInitDate [ 1 ]

Version: 14 15 VersDt

16 formlang

Completed by: 17 InitDate (initials/date)

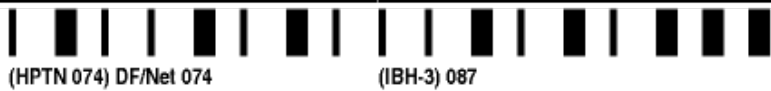

(HPTN 074) DF/Net 074

(IBH-3) 087

6 visit

Participant ID:

7 ptid

Site Number Network Number Chk Cohort

Header [ 1 ]

Index Baseline HIV Care and ART

Page 3 of 6

Index Baseline HIV [ 1 ]

8 Have you ever visited an HIV clinic or pharmacy with the intention of starting ART? 8 IBHastrt No

9 Have you ever been on ART treatment? 9 IBHatrt No

10 Are you currently taking ART medications? If yes, complete Index ART Initiation CRF. 10 IBHacurr No. If no, go to Item 16 on page 5.

11 We know that it is very difficult to take your HIV medications all the time. When was the last time you missed taking any doses of your ART medication?

11 IBHalast Never missed taking medications in past 3 months. End of form.

12 In the last month, on about how many days did you miss at least one tablet? 12 IBHadays

13 Did you miss at least one tablet in the last four days? 13 IBHa4day No. If no, go to Item 15 on page 4. 13a. In the last four days, on how many days did you miss at least one tablet? 14 IBHa4num

14 Did you miss at least one tablet yesterday? 15 IBHayest No

Version InitDate [ 1 ]

Version 3 16 17 VersDt

18 formlang Completed by: 19 InitDate (initials/date)

(HPTN 074) DF/Net 074

(IBH-4) 088

6 visit

Index Baseline HIV F 1

No data recorded on this page

8 IBH4ndr

Participant ID:

7 ptid

Site Number Network Number Chk Cohort

Header [ 1 ]

Index Baseline HIV Care and ART

Page 4 of 6

15 The last time you missed at least one tablet, which of these best describes the reason why? Mark only one. End of form.

I forgot

I did not have the medication with me at the time I needed to take it

I did not want person(s) nearby to see me taking the medication

I was trying to avoid side effects

I felt healthy

9 IBHarsn

I was drunk

I am not engaging in any behaviors that can transmit HIV to others

I do not believe the medicines are beneficial

Not applicable

Other, specify: (Local language)

(English) 10 IBHarsx

Version InitDate [ 1 ]

Version 11 12 VersDt

13 formlang

Completed by: 14 InitDate (initials/date)

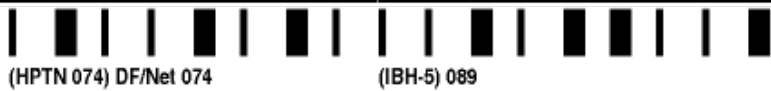

6 visit

Index Baseline HIV [ 1 ]

No data recorded on this page [ 8 ]

IBH5ndr

Participant ID:

7 ptid

Site Number      Network Number      Chk      Cohort

Header [ 1 ]

### Index Baseline HIV Care and ART

Page 5 of 6

|           |                                                                                                                                                                   |                                                          |
|-----------|-------------------------------------------------------------------------------------------------------------------------------------------------------------------|----------------------------------------------------------|
| <b>16</b> | Sometimes people have trouble starting HIV treatment (ART) because of personal situations or circumstances. What are the reasons you have not started taking ART? | Agree      Disagree      Not relevant/<br>Not Applicable |
|           | 16a. You don't think that you need it.                                                                                                                            | 9 IBHpneed                                               |
|           | 16b. You don't have time to go to the clinic.                                                                                                                     | 10 IBHptime                                              |
|           | 16c. You don't have the energy or motivation to go to the clinic.                                                                                                 | 11 IBHpenrg                                              |
|           | 16d. You missed an appointment, so it is difficult to go back.                                                                                                    | 12 IBHpappt                                              |
|           | 16e. You have been too sick to go to the clinic.                                                                                                                  | 13 IBHpsick                                              |
|           | 16f. Your drug use got in the way of going to the clinic.                                                                                                         | 14 IBHpdrug                                              |
|           | 16g. You are worried about the unwanted side effects or complications.                                                                                            | 15 IBHpsaff                                              |
|           | 16h. You don't understand when you are supposed to take each pill.                                                                                                | 16 IBHpunds                                              |
|           | 16i. You sold or lost your medicine or your medicine was stolen.                                                                                                  | 17 IBHplost                                              |
|           | 16j. Your drinking (alcohol) got in the way of you going to the clinic.                                                                                           | 18 IBHpalc                                               |
|           | 16k. You had to wait too long, so you left without being seen.                                                                                                    | 19 IBHpwait                                              |
| <b>17</b> | Sometimes people find it difficult to start taking ART because of their family or friends. What are the reasons you have not started taking ART?                  | Agree      Disagree      Not relevant/<br>Not Applicable |
|           | 17a. You don't have enough support from family or friends.                                                                                                        | 20 IBHfnosp                                              |
|           | 17b. You don't want others to know you have HIV (e.g., see me take medication).                                                                                   | 21 IBHfknow                                              |

/ersionInitDate [ 1 ]

Version 22 23 VersDt

24 formlang

Completed by: 25 InitDate (initials/date)

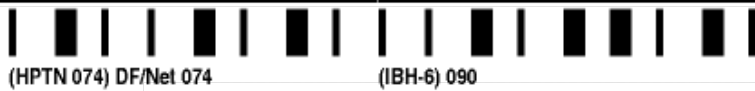

(HPTN 074) DF/Net 074

(IBH-6) 090

6 visit

Index Baseline HIV [ 1 ]

No data recorded on this page

8 IBH6ndr

Participant ID:

7 ptid

Site Number Network Number Chk Cohort

Header [ 1 ]

Index Baseline HIV Care and ART

Page 6 of 6

18 Many people find it difficult to start taking ART, even if they have previously tried, because of challenges in the health systems/health care process. What were the reasons you have not started taking ART?

Agree Disagree Not relevant/ Not Applicable

18a. You do not have the necessary materials (e.g. paperwork, identification, test results) needed by the clinic.

9 IBHhmat

18b. ART is too expensive.

10 IBHhexp

18c. ART was not available.

11 IBHhna

18d. HIV care provider would not continue your medicine or prescription.

12 IBHhmed

18e. You do not know how or where to get ART.

13 IBHhget

18f. You find transport/travel to the clinic is difficult.

14 IBHhtran

18g. You have been traveling.

15 IBHhtrav

18h. You have been in jail or incarcerated.

16 IBHhjail

18i. You are scared of being arrested for your drug use.

17 IBHharst

18j. You will need to register with the government as being a drug user.

18 IBHhgov

19 Are there any other reasons you find it difficult to start taking ART?

Local language:

English: 19 IBHhothx

Version InitDate [ 1 ]

Version: 20 21 VersDt

22 formlang

Completed by: 23 InitDate (initials/date)

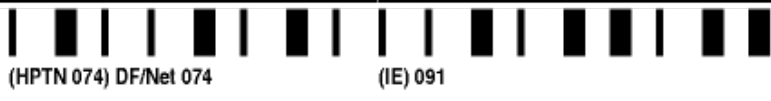

6 visit

Participant ID:  Enrollment Date:

Site Number      Network Number      Chk      Cohort      dd      MM      YY

Header [ 1 ]

### Index Enrollment

1 Did the participant agree to have their samples of blood collected at enrollment used for future testing related to HIV infection?

9 Yes Ecolbl  
 No

2 Did the participant agree to have their samples of urine collected at enrollment used for future testing related to drug use?

10 Yes Ecolurn  
 No

3 To which study arm is the participant assigned?

11 Standard of care Earm  
 Intervention

Version   VersDt  formlang Completed by:  InitDate (initials/date)

/ersionInitDate [ 1 ]



(HPTN 074) DF/Net 074

(PE) 095

6 visit

Participant ID:

7 ptid

Enrollment Date:

8 Date

Site Number Network Number Chk Cohort

dd /mm/yy Header [ 1 ]

Partner Enrollment

1 Did the participant agree to have their samples of blood collected at enrollment used for future testing related to HIV infection?

PartnerEnroll [ 1 ]

9 P Ecolbl  
Yes  
No

2 Did the participant agree to have their samples of urine collected at enrollment used for future testing related to drug use?

10 P Ecolumn  
Yes  
No

3 At which index visit was this network partner enrolled?

Index Visit Code:

11 P Eienrvs

3a. Index enrollment date:

Date:

12 P Eienrdt  
dd /mm/yy

/ersionInitDate [ 1 ]

Version 13 14 VersDt

15 formlang

Completed by: 16 InitDate (initials/date)

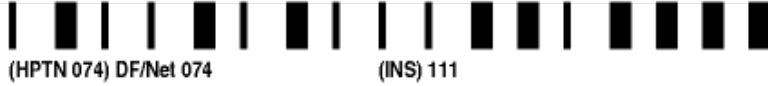

Visit Code: 6 visit

Participant ID:

7 ptid

Visit Date: 8 Date

Site Number Network Number Chk Cohort

dd /mm/yyyy Header [ 1 ]

### Index Network Status

1 How many total injection partners are listed on the Social/Sexual Network List?  9 INSpnum # of partners IndexNetwork [ 1 ]

2 How many new injection partners were added to the partner list as of this visit? By new, we mean they had not been in the list prior to this visit.  10 INSpnum # of new partners

3 Is a new partner enrolling at this visit?  11 INSpennr No

3a. Does the index currently have an enrolled partner with whom they are currently (within the last month) sharing needles, water, cookers, etc?  12 INSpennr No

If both 3 and 3a are no, end of form.

4 List the enrolled partners with whom the participant has shared needles, water, cookers etc. in the last 3 months (include partners enrolled at this visit).

Partner's Initials or Nickname:

Participant ID:

Site Number Network Number Chk Cohort

4a.  13 INSpart  14 INSpid IndexNetwork [ 2 ]

4b.  15 INSpart  16 INSpid IndexNetwork [ 3 ]

4c.  17 INSpart  18 INSpid IndexNetwork [ 4 ]

4d.  19 INSpart  20 INSpid IndexNetwork [ 5 ]

4e.  21 INSpart  22 INSpid IndexNetwork [ 6 ]

4f.  23 INSpart  24 INSpid IndexNetwork [ 7 ]

4g.  25 INSpart  26 INSpid IndexNetwork [ 8 ]

4h.  27 INSpart  28 INSpid IndexNetwork [ 9 ]

4i.  29 INSpart  30 INSpid

Comments (Local Language):

Comments (English): 31 INScomm

VersionInitDate [ 1 ]

Version  32  33 VersDt

34 formlang Completed by:  35 InitDate (initials/date)

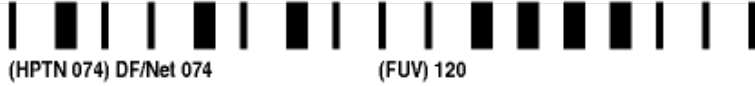

Visit Code: 6 visit

Participant ID:

7 ptid

Visit Date: 8 Date

Site Number Network Number Chk Cohort

dd /mm/yyyy Header [ 1 / ]

Follow-up Visit

Follow-up Visit [ 1 / ]

1 Is this an interim visit? 9 FUVinvis No -> If no, go to item 2.

1a. Reason for interim visit. Mark all that apply.

- 10 FUVrae 11 FUVrsom 12 FUVhvlt 13 FUVninjp 14 FUVclabw 15 FUVaoth 16 FUVaothx

1b. Besides this form, what other DataFax forms were completed at this visit? Mark all that apply.

- 17 FUVvht 18 FUViai 19 FUVsut 20 FUVuds 21 FUVvss 22 FUVcdf 23 FUVae 24 FUVvsil 25 FUVboth 26 FUVbothx

2 At this visit, how many new Adverse Experiences (AEs) have been reported? 27 FUVaeng Complete a separate AE Log page for each AE. If none, enter 00.

3 At this visit, how many new social impacts have been reported? 28 FUVsilng Complete a separate Social Impact Log page for each event. If none, enter 00.

/ersionInitDate [ 1 / ]

Version 29 30 VersDt 31 formlang Completed by: 32 InitDate (initials/date)

Participant ID:

7 ptid

Site Number Network Number Chk Cohort

Header [ 1 ]

**Social Impact Log**

1 Concisely describe social impact: \_\_\_\_\_ SocialImpctLog [ 1 ]

8 SILsumx

2 Onset date: 9 SILondt  
dd MMM yy

3 Reported at visit: 10 SILatvis

4 Social impact code: 11 SILcode → See back for definitions of Social Impact Codes.

VersionInitDate [ 1 ]

Version 12 13 VersDt

14 formlang

Completed by: 15 InitDate (initials/date)

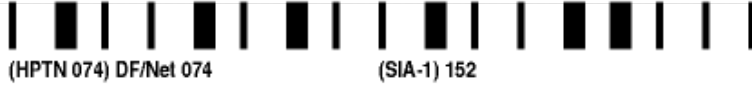

Visit Code: 6 visit

Participant ID:

7 ptid

Contact Date: 8 Date

Site Number Network Number Chk Cohort

dd /mm/yyyy Header [ 1 ]

Social Impact Assessment

Page 1 of 2

SocialImpact [ 1 ]

1 Because of your participation in this study, did anything negative or bad happen to you that you have not reported to us already? 9 SIAnegrn No -> If no, go to item 4.

2 Because of your participation in this study, have you...

2a. been arrested or had trouble with the police or other legal problems? 10 SIAlg No -> If no, go to item 2b.

2a1. If yes how many times? 11 SIAlgnum # of times

2b. had trouble getting or keeping housing? 12 SIAhs No -> If no, go to item 2c.

2b1. If yes how many times? 13 SIAbsnum # of times

2c. had trouble getting or keeping a job or trouble with income or economic support? 14 SIAj No -> If no, go to item 2d.

2c1. If yes how many times? 15 SIAjnum # of times

2d. had trouble getting health care or with health insurance? 16 SIAhe No -> If no, go to item 2e.

2d1. If yes how many times? 17 SIAhenum # of times

2e. had personal trouble with friends, family, or acquaintances? 18 SIAtr No -> If no, go to item 2f.

2e1. If yes how many times? 19 SIAtrnum # of times

2f. had any other type of problem? 20 SIAop specify: No -> If no, go to item 3.

Local language: English: 21 SIAopx

3 Indicate the total number of impacts: 22 SIAgum Complete a separate Social Impact Log (SIL) for each impact.

4 Has your participation in this study had any positive or beneficial impact on your life? 23 SIApos Don't know If no, end of form. Do not fax page 2.

/ersionInitDate [ 1 ]

Version 2 24 25 VersDt

26 formlang Completed by: 27 InitDate (initials/date)

(HPTN 074) DF/Net 074

(SIA-2) 153

Visit Code: 6 visit

Participant ID:

7 ptid

Site Number Network Number Chk Cohort

Header [ 1 ]

Social Impact Assessment

Page 2 of 2

5 Because of your participation in this study, have you experienced...

Social Impact [ 1 ]

5a. Employment improvement?

8 SIAei

5b. Financial improvement?

9 SIAfi

5c. Reduction in drug use?

10 SIAredd

5d. Reduction in cravings/withdrawal?

11 SIAredc

5e. Gained knowledge?

12 SIAgknow

5f. Life improvement?

13 SIAli

5g. Physical health improvement?

14 SIAphi

5h. Improved relationships?

15 SIAreli

5i. Reduced stigma?

16 SIAredsg

5j. Improved mental health?

17 SIAmhi

5k. Other, specify:

18 SIAoi

Local language:

English: 19 SIAoix

Version/InitDate [ 1 ]

Version: 20 21 VersDt

22 formlang

Completed by: 23 InitDate (initials/date)

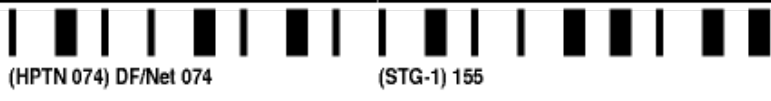

Visit Code: 6 visit

Participant ID:  Contact Date:

Site Number    Network Number    Chk    Cohort    dd    MM    YY

**Social Support and Stigma Questionnaire** Page 1 of 2

*In this section, I am going to read you statements about how you may feel about yourself, your injection drug use, and your HIV/AIDS infection. I would like you to tell me if you agree strongly, agree, disagree, or disagree strongly with each statement.*

**INTERNALIZED STIGMA AND SHAME**

|   |                                                        |                                          |       |          |                   |
|---|--------------------------------------------------------|------------------------------------------|-------|----------|-------------------|
| 1 | I think less of myself or I have felt ashamed because: | Agree strongly                           | Agree | Disagree | Disagree strongly |
|   | 1a. I inject drugs.                                    | <input type="text" value="9 STGissid"/>  |       |          |                   |
|   | 1b. I am living with HIV.                              | <input type="text" value="10 STGisswh"/> |       |          |                   |

**EXPERIENCED STIGMA**

|   |                                                |                                         |       |          |                   |
|---|------------------------------------------------|-----------------------------------------|-------|----------|-------------------|
| 2 | I have become isolated from my family because: | Agree strongly                          | Agree | Disagree | Disagree strongly |
|   | 2a. I inject drugs.                            | <input type="text" value="11 STGesid"/> |       |          |                   |
|   | 2b. I am living with HIV.                      | <input type="text" value="12 STGeswh"/> |       |          |                   |

**ANTICIPATED STIGMA**

|   |                                                                                                            |                                                                                                           |                                                    |          |                   |  |
|---|------------------------------------------------------------------------------------------------------------|-----------------------------------------------------------------------------------------------------------|----------------------------------------------------|----------|-------------------|--|
| 3 | I fear that if I disclosed my HIV status to my family, they would exclude me from usual family activities. | Agree strongly                                                                                            | Agree                                              | Disagree | Disagree strongly |  |
|   |                                                                                                            | <input type="text" value="13 STGfamex"/>                                                                  |                                                    |          |                   |  |
|   | 4                                                                                                          | I fear that if I disclosed my HIV status to others, I would find it hard to find work.                    | <input type="text" value="14 STGfindw"/>           |          |                   |  |
|   | 5                                                                                                          | I fear that if I go to an MMT or buprenorphine clinic to treat my substance use I will be treated poorly. | <input type="text" value="15 STGmbtp"/>            |          |                   |  |
|   | 6                                                                                                          | I fear that if I go to an HIV clinic I will be treated poorly because I inject drugs.                     | <input type="text" value="16 STGhivtp"/>           |          |                   |  |
|   | 7                                                                                                          | I do not feel comfortable talking to health care providers as I feel they would judge me.                 | <input type="text" value="17 STGhcpjm"/>           |          |                   |  |
|   |                                                                                                            |                                                                                                           | <input type="text" value="VersionInitDate [ 1 ]"/> |          |                   |  |

Version:   Completed by:  (initials/date)

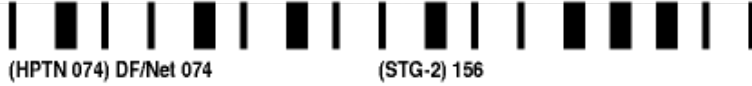

Visit Code: 6 visit

Participant ID:

7 ptid

Site Number Network Number Chk Cohort

Header [ 1 ]

Social Support and Stigma Questionnaire

Page 2 of 2

8 Over the last 2 weeks, how often have you been bothered by any of the following problems?

|                                                                                                                                                                       | Not at all                       | Several days | More than half of the days | Nearly every day |
|-----------------------------------------------------------------------------------------------------------------------------------------------------------------------|----------------------------------|--------------|----------------------------|------------------|
| 8a. Little interest or pleasure in doing things                                                                                                                       | 8 STGllpt <input type="text"/>   |              |                            |                  |
| 8b. Feeling down, depressed or hopeless                                                                                                                               | 9 STGdprss <input type="text"/>  |              |                            |                  |
| 8c. Trouble falling or staying asleep or sleeping too much                                                                                                            | 10 STGsleee <input type="text"/> |              |                            |                  |
| 8d. Feeling tired or having little energy                                                                                                                             | 11 STGtired <input type="text"/> |              |                            |                  |
| 8e. Poor appetite or overeating                                                                                                                                       | 12 STGeatng <input type="text"/> |              |                            |                  |
| 8f. Feeling bad about yourself—or that you are a failure or have let yourself or your family down                                                                     | 13 STGflbad <input type="text"/> |              |                            |                  |
| 8g. Trouble concentrating on things, such as reading the newspaper or watching television                                                                             | 14 STGtrbtc <input type="text"/> |              |                            |                  |
| 8h. Moving or speaking so slowly that other people have noticed; or the opposite—being so fidgety or restless that you have to be moving around a lot more than usual | 15 STGmovng <input type="text"/> |              |                            |                  |
| 8i. Thoughts that you would be better off dead or of hurting yourself in some way                                                                                     | 16 STGthght <input type="text"/> |              |                            |                  |

9 People sometimes look to others for companionship, assistance, or other types of support. Please tell me how often each of the following kinds of support are available to you if you need them.

9a. Someone to have a good time with:

17 STGgoodt  Most of the time

9b. Someone to get together with for relaxation:

18 STGrelax  Most of the time

9c. Someone to do something enjoyable with:

19 STGenjoy  Most of the time

Version/InitDate [ 1 ]

Version 1. 20. 21 VersDt

22 formlang

Completed by: 23 InitDate (initials/date)



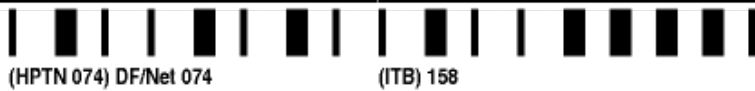

Visit Code: 6 visit

Participant ID:

7 ptid

Contact Date: 8 Date

Site Number Network Number Chk Cohort

dd M/YY Header [ 1 ]

### Index Treatment Belief Questionnaire

|    |                                                                                         | Agree strongly | Agree | Disagree | Disagree strongly |                         |
|----|-----------------------------------------------------------------------------------------|----------------|-------|----------|-------------------|-------------------------|
| 1  | If you have side effects, you should continue to take your HIV treatment.               | 9 ITBhivse     |       |          |                   | IndexBeliefQues [ 1 ]   |
| 2  | HIV treatment is safe.                                                                  | 10 ITBhivsf    |       |          |                   |                         |
| 3  | HIV treatment is effective (by effective we mean, does it work).                        | 11 ITBhivef    |       |          |                   |                         |
| 4  | If you miss your medication one day, what should you do?                                | 12 ITBhivms    |       |          |                   | Take one and half doses |
| 5  | In the past 3 months, have you set personal goals for your HIV treatment?               | 13 ITBhivgl    |       |          |                   | No                      |
| 6  | In the past 3 months, have you asked questions to your medical provider about your HIV? | 14 ITBhivq     |       |          |                   | No                      |
|    |                                                                                         | Agree strongly | Agree | Disagree | Disagree strongly |                         |
| 7  | If you have side effects, you should continue to take your substance use treatment.     | 15 ITBsuse     |       |          |                   |                         |
| 8  | Substitution therapy (site specific, only ask if available) therapy is safe.            | 16 ITBsubsf    |       |          |                   | N/A                     |
| 9  | Substance use treatment is effective (by effective we mean, does it work).              | 17 ITBsuef     |       |          |                   |                         |
| 10 | If you miss your substance use treatment medication one day, what should you do?        | 18 ITBsums     |       |          |                   | Take one and half doses |

VersionInitDate [ 1 ]

Version 19 20 VersDt

21 formlang

Completed by: 22 InitDate (initials/date)

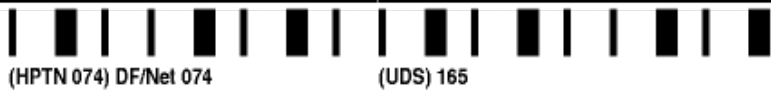

Visit Code: 6 visit

Participant ID:

7 ptid

Specimen Collection Date: 8 Date

Site Number Participant Number Chk Cohort

dd Header [ 1 ]

Urine Drug Screen

UrineDrugScreen [ 1 ]

9 UDSnd Not done/Not collected -> End of form.

| 1                      | Was drug detected? | Yes              | No        | Not done/<br>Not collected |
|------------------------|--------------------|------------------|-----------|----------------------------|
|                        |                    | 1a. Amphetamines | 10 UDSamp |                            |
| 1b. Methamphetamines   | 11 UDSmamp         |                  |           |                            |
| 1c. Methadone          | 12 UDSmdn          |                  |           |                            |
| 1d. Opiates/morphine   | 13 UDSop           |                  |           |                            |
| 1e. Benzodiazepines    | 14 UDSbenz         |                  |           |                            |
| 1f. Buprenorphine      | 15 UDSbup          |                  |           |                            |
| 1g. Cannabinoids       | 16 UDScann         |                  |           |                            |
| 1h. Cocaine metabolite | 17 UDSco           |                  |           |                            |
| 1i. Other, specify:    | 18 UDSoth          |                  |           |                            |
|                        | (Local language)   |                  |           |                            |
|                        | (English) 19 UDSox |                  |           |                            |

Comments (Local language):

Comments (English): 20 UDScomm

VersionInitDate [ 1 ]

Version 21 22 VersDt

23 formlang

Completed by: 24 InitDate (initials/date)

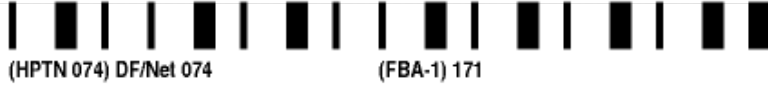

Visit Code: 6 visit

Participant ID:

7 ptid

Assessment Date: 8 Date

Site Number Network Number Chk Cohort

dd Header [ 1 ]

### Follow-up Behavior Assessment

Page 1 of 8

A broad range of participants are taking part in this study. So some questions may not apply to you. We ask the same questions of all participants.

In this interview, you will be asked about your sexual behaviors and possible alcohol and drug use. Some of the questions may seem very personal. Please remember that all of your answers will be kept private. Your responses are linked only to your study number, not to your name.

**We need you to answer these questions honestly.** We do not judge about alcohol or drug use. We make no judgments about how you have sex or the number of times or with whom.

These questions help us understand the type of behaviors our participants are doing while on study. Your honesty will help us understand these differences in behaviors.

#### FOLLOW-UP DEMOGRAPHICS

1 How would you describe your current living situation? *Mark all that apply.*

FuBehavAssess [ 1 ]

- 9 FBAIshou 9a. Live in a house that I own or rent
- 10 FBAIspar 10. Live in parent's home
- 11 FBAIsrel 11. Live in other relative's home (e.g. sibling, cousin, aunt and/or uncle)
- 12 FBAIsrnt 12. Rent a room or space in someone else's house or apartment
- 13 FBAIsfre 13. Stay with someone else for free (don't pay regular room and board)
- 14 FBAIsst 14. Live on the street, in a park, alley or abandoned building
- 15 FBAIshe 15. Live in a homeless shelter
- 16 FBAIsdif 16. Stay at more than two different places a week
- 17 FBAIsrn 17. Live in a drug recovery or any transitional house
- 18 FBAIso 18. Other place, specify:  
Local language: \_\_\_\_\_  
English: 19 FBAIsox
- 20 FBAIsref 20. Refuse to answer

VersionInitDate [ 1 ]

Version 21 22 VersDt

23 formlang

Completed by: 24 InitDate (initials/date)

(HPTN 074) DF/Net 074

(FBA-2) 172

Visit Code: 6 visit

Participant ID:

7 ptid

Site Number Network Number Chk Cohort

Header [ 1 ]

Follow-up Behavior Assessment

Page 2 of 8

2 Who lives with you? Mark all that apply.

- 8 FBAlvspo 2a. Spouse/partner/girl-boyfriend
- 9 FBAlvch 2b. Own children
- 10 FBAlvpar 2c. Parents
- 11 FBAlvfam 2d. Other family members
- 12 FBAlvfr 2e. Friends
- 13 FBAlvoth 2f. Others (e.g., roommates, tenants)
- 14 FBAlvalo 2g. Live alone
- 15 FBAlvref 2h. Refuse to answer

3 What is your relationship status? Are you:

- Married
- Living with a sexual partner but not married
- Separated
- 16 FBAmar Divorced
- Widowed
- Single
- Refuse to answer

4 At any time during the last 3 months, that is from today, have you been unemployed?

- Yes
- 17 FBAun3mo No
- Refuse to answer

Version InitDate [ 1 ]

Version 18 19 VersDt

20 formlang

Completed by: 21 InitDate (initials/date)

(HPTN 074) DF/Net 074

(FBA-3) 173

Visit Code: 6 visit

Participant ID:

7 ptid

Site Number Network Number Chk Cohort

Header [ 1 ]

Follow-up Behavior Assessment

Page 3 of 8

5 Which of the following best describes your current employment status? Are you:

FuBehavAssess [ 1 ]

- Employed full-time
- Employed part-time
- Unemployed but seeking work
- Unemployed—not seeking work
- Retired
- Refuse to answer

8 FBAemp

6 In the past month, how many days have you been working for pay?

9 FBAwrkdy # days

7 (Index: Intervention ONLY) Do you have a designated support person?

10 FBA dsigns No

→ If no, go to item 8.

7a. What is the relationship of the support person to you?

- Spouse/partner/girl-boyfriend
- Father/mother
- Sibling
- Other family member
- Friend
- Other, specify:

11 FBA drel

Local language:

English:

12 FBA drelx

INCARCERATION

8 In the last 3 months, how many different times were you in...

8a. Jail/prison?

13 FBA jail # of times

8b. Involuntary detoxification/detention?

14 FBA detox # of times

8c. Other incarceration, specify:

15 FBA oinc # of times

Local language:

English:

16 FBA oincx

Version InitDate [ 1 ]

Version 3

17 2 18 VersDt

19 formlang

Completed by: 20 InitDate (initials/date)

Participant ID:

7 ptid

Site Number Network Number Chk Cohort

Header [ 1 ]

**Follow-up Behavior Assessment**

Page 4 of 8

**ALCOHOL USE (Audit C)** Answer questions to reflect your behavior over the past 3 months.

9 How often do you have a drink containing alcohol?

FuBehavAssess [ 1 ]

8 FBAafreq

2-3 times a week  
4 or more times a week

10 How many standard drinks containing alcohol do you have on a typical day?

9 FBAanum

7 to 9  
10 or more

11 How often do you have six or more drinks on one occasion?

10 FBA6drnk

Weekly  
Daily or almost daily

**NON-INJECTION DRUG USE**

12 In the last 3 months, did you... Yes No

12a. Use marijuana? 11 FBAnimj

12b. Use stimulants (cocaine, methamphetamines)? 12 FBAnist

12c. Use opiates (heroin, opium)? 13 FBAniop

12d. Use other drugs (as indicated by sites), specify: 14 FBAnioth

Local language: \_\_\_\_\_

English: 15 FBAniox

13 When was the last time you used marijuana, amphetamines, methadone, opiates or benzodiazepines that you did not inject?

16 FBAnidt  
dd MMM yy

Never OR 17 FBAninev

/ersionInitDate [ 1 ]

Version: 18 19 VersDt

20 formlang

Completed by: 21 InitDate (initials/date)

(HPTN 074) DF/Net 074

(FBA-5) 175

Visit Code: 6 visit

Participant ID:

7 ptid

Site Number Network Number Chk Cohort

Header [ 1 ]

Follow-up Behavior Assessment

Page 5 of 8

INJECTION DRUG USE

FuBehavAssess [ 1 ]

14 In the last 3 months, did you use a needle to inject any drugs under your skin or into a vein? 8 FBAinj3m No -> If no, go to item 33 on page 8.

15 In the last 3 months, which of the following did you inject?
15a. Amphetamines 9 FBAiamp
15b. Methamphetamines 10 FBAimamp
15c. Cocaine 11 FBAicoc
15d. Heroin 12 FBAiher
15e. Opium 13 FBAiop
15f. Buprenorphine 14 FBAibup
15g. Methadone 15 FBAimeth
15h. Benzodiazepines 16 FBAibenz
15i. Ketamine 17 FBAiket
15j. Homemade opioids 18 FBAihop
15k. Short and long action stimulants 19 FBAisas
15l. Dezomorphine 20 FBAidez
15m. Other, specify: 21 FBAioth
Local language:
English: 22 FBAiotx

16 In the last month, on how many days did you inject drugs? 23 FBAinj# of days

17 In the last month, on days that you injected, how many times a day did you usually inject drugs? 24 FBAinj# of times a day

18 When was the last day you injected (including today)? 25 FBAidt OR 26 FBAima
dd MMM yy # of months ago

/ersionInitDate [ 1 ]

Version 3 27 28 VersDt

29 formlang

Completed by: 30 InitDate (initials/date)

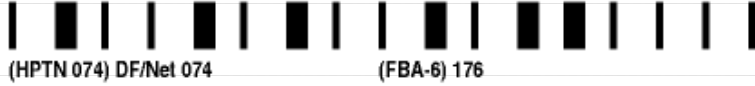

Visit Code: 6 visit  
FuBehavAssess [ 1 ]  
No data recorded on this page [ 8 ]

FBAAndr

Participant ID:

7 ptid  
Site Number Network Number Chk Cohort

Header [ 1 ]

**Follow-up Behavior Assessment**

Page 6 of 8

**SHARING**

Often people share syringes and other equipment because they are in a rush, they are concerned about the police, feeling sick or for a variety of other reasons.

Yes No Don't know

19 Have you shared rinse water in the last 3 months?

9 FBAsrw

If no, go to item 20. ←

19a. The last time you injected, did you share rinse water?

10 FBAsrwl

20 Have you shared a cooker/container in the last 3 months?

11 FBAscc

If no, go to item 21. ←

20a. The last time you injected, did you share a cooker/container?

12 FBAsccs

21 Have you shared filter cotton in the last 3 months?

13 FBAsfc

If no, go to item 22. ←

21a. The last time you injected, did you share filter cotton?

14 FBAsfcls

**CLEANING**

22 How often do you clean your needle before injecting?

15 FBAClnf Never

Yes No Don't know

22a. The last time you injected, did you clean the needle before you injected?

16 FBAndlc

22b. The last time you injected, did you use a new needle?

17 FBAndln

22c. How often do you clean your needle after injecting?

18 FBAClna Never

Yes No Don't know

22d. The last time you injected, did you clean the needle after you injected?

19 FBAClns

/ersionInitDate [ 1 ]

Version: 20, 21 VersDt

22 formlang

Completed by: 23 InitDate (initials/date)



(HPTN 074) DF/Net 074

(FBA-7) 177

Visit Code: 6 visit  
FuBehavAssess [ 1 ]  
No data recorded on this page [ 8 ]

FBAAndr

Participant ID:

7 ptid

Site Number Network Number Chk Cohort

Header [ 1 ]

### Follow-up Behavior Assessment

Page 7 of 8

#### PRE-FILLING AND BACKLOADING SYRINGES

- 23 The last time you injected, did you use a pre-filled syringe?  Don't know
- 24 The last time you injected, did you inject drugs that were frontloaded or backloaded into the syringe or needle that you used?  Don't know
- 25 In the last 3 months, how many different people did you use injection drugs with?  # of people → If 000, go to item 31.
- 26 In the last 3 months, how many times did you even once pass on a needle or syringe to someone else after you used it?  # of times → If 000, go to item 28.
- 27 In the last 3 months, with how many different people did you pass on a needle or syringe after you had used it?  # of people
- 28 In the last 3 months, how many times did you ever, even once, use a needle or syringe after someone else used it?  # of times → If 000, go to item 30.
- 29 In the last 3 months, with how many different people did you use a needle or syringe after someone else used it?  # of people
- 30 In the past 3 months, when you shared syringes, how often did you inject last?  
 Sometimes  
I have not shared in the past 3 months
- 31 In the last 3 months, did you get your new needles/syringes from a...  
31a.  I did not get new needles in the last 3 months → Go to item 33 on page 8.  
Yes No  
31b. Pharmacy or health center?   
31c. Needle seller?   
31d. Needle exchange?   
31e. Other drug injectors?   
31f. Other, specify?   
Local language: \_\_\_\_\_ English:
- 32 In the last 3 months, when you obtained new needles, typically, how many did you buy at one time?  # of needles

/ersionInitDate [ 1 ]

Version 3

Completed by:  (initials/date)

Participant ID:

7 ptid

Site Number Network Number Chk Cohort

Header [ 1 ]

**Follow-up Behavior Assessment**

Page 8 of 8

**SEXUAL BEHAVIOR QUESTIONS**

The next few questions are about sexual behavior. These are very personal questions. Please remember that all the information you give us is confidential. We ask that you answer the questions as honestly as you can.

uBehavAssess [ 1 ]

|                                                                                                                                                                                                                |                                                                                                            |             |                                  |                          |
|----------------------------------------------------------------------------------------------------------------------------------------------------------------------------------------------------------------|------------------------------------------------------------------------------------------------------------|-------------|----------------------------------|--------------------------|
| 33                                                                                                                                                                                                             | In the last month, did you have vaginal or anal sex?                                                       | 8 FBAsexlm  | No                               | → If no, go to item 39.  |
| 34                                                                                                                                                                                                             | In the last month, how many different female sex partners have you had?                                    | 9 FBAsexf   | # of female sex partners         |                          |
| 35                                                                                                                                                                                                             | In the last month, how many different male sex partners have you had?                                      | 10 FBAsexm  | # of male sex partners           |                          |
| 36                                                                                                                                                                                                             | Do you have a main partner such as a husband/wife or boyfriend/girlfriend?                                 | 11 FBAmp    | No                               | → If no, go to item 38.  |
|                                                                                                                                                                                                                | 36a. Is your main partner male or female?                                                                  | 12 FBAmpgen | Other, specify: (Local language) |                          |
|                                                                                                                                                                                                                |                                                                                                            |             | (English)                        | 13 FBAmpgnx              |
| 37                                                                                                                                                                                                             | In the last month, how many times did you have vaginal or anal sex with your main partner?                 | 14 FBAsexmp | # of times                       | → If 000, go to item 38. |
|                                                                                                                                                                                                                | 37a. How many of these times did you (or your partner) use a condom?                                       | 15 FBAmpcon | # of times                       |                          |
| 38                                                                                                                                                                                                             | In the last month, how many times did you have vaginal or anal sex with someone other than a main partner? | 16 FBAsexop | # of times                       | → If 000, go to item 39. |
|                                                                                                                                                                                                                | 38a. How many of these times did you (or your partner) use a condom?                                       | 17 FBAopcon | # of times                       |                          |
| Next I am going to ask about your sex trade (paid or paying) partners. By sex trade partners, I mean people that you had oral, vaginal or anal sex with in exchange for money, drugs, food or a place to stay. |                                                                                                            |             |                                  |                          |
| 39                                                                                                                                                                                                             | In the last month, how many times did you give sex partners money or drugs in exchange for sex?            | 18 FBAexchp | # of times                       |                          |
| 40                                                                                                                                                                                                             | In the last month, how many times did a sex partner give you money or drugs in exchange for sex?           | 19 FBAexchp | # of times                       |                          |

/ersionInitDate [ 1 ]

Version 3 20 21 VersDt

22 formlang

Completed by: 23 InitDate (initials/date)

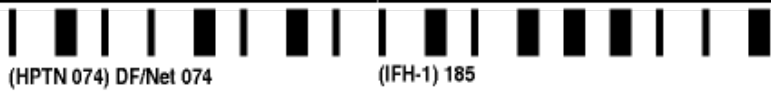

(HPTN 074) DF/Net 074

(IFH-1) 185

Visit Code: 6 visit

Participant ID:

7 ptid

Assessment Date: 8 Date

Site Number Network Number Chk Cohort

dd MMMM Header 1 YY

Index Follow-up HIV Care and ART

Page 1 of 6

The next few questions are about anti-HIV medicines called antiretroviral therapy that you may be taking. These questions are not about drugs you may be taking to treat substance use. We need to know what is really happening, not what you think we "want to hear." Many people find it hard to take their medications all of the time.

1 Since your last visit, have you seen an HIV clinician?  9 IFHcln No **→ If no, go to item 2.**

1a. If yes, on what date?    
 dd MMM yy

1b. How many total clinical visits have you had since your last study visit?  # of clinical visits

2 Since your last study visit, with whom have you shared that you are living with HIV? *Mark all that apply.*

12 IFHspous 2a. Spouse/Partner/Girl-Boyfriend  16 IFHfrnds 2e. Friends

13 IFHchild 2b. Own children  17 IFHshoth 2f. Others

14 IFHparen 2c. Parents  18 IFHnoone 2g. No one

15 IFHofm 2d. Other family members  19 IFHref 2h. Refuse to answer

3 How many of your drug partners (the people you inject drugs with) know that you have HIV?

*Less than half of my partners*

*None of my partners*

Version:   VersDt  formlang Completed by:  InitDate (initials/date)

Participant ID:

7 ptid

Site Number Network Number Chk Cohort

Header [ 1 ]

**Index Follow-up HIV Care and ART**

Page 2 of 6

4 Who is the most supportive in helping you with your HIV care and treatment?

IndexFlwUpHIV [ 1 ]

- Health care providers (such as doctors or nurses)
- Your spouse/live-in partner/long-term partner
- Injecting partners
- Commercial sex workers
- Your mother or father
- Your in-laws
- Other family members
- Priests/religious leaders
- Your neighbors or community members
- Friends
- Your employers
- Other, specify:
- Local language: \_\_\_\_\_ English: 9 IFHothx

8 IFHsuprt

9 IFHothx

5 How often have you talked to your family or support person about your HIV medications?

- Once a month
- One time
- Never

10 IFHtalk

6 Since your last visit, has any HIV clinician told you that you should initiate ART treatment for your own health?

- Yes
- No
- Not applicable

11 IFHainit

7 Since your last visit, have you visited an HIV clinic or pharmacy with the intention of starting ART?  12 IFHastrt No

12 IFHastrt

/ersionInitDate [ 1 ]

Version 2 13 14 VersDt

15 formlang

Completed by: 16 InitDate (initials/date)

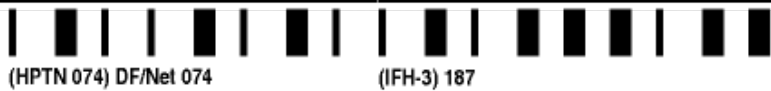

Visit Code: 6 visit

Participant ID:

7 ptid

Site Number Network Number Chk Cohort

Header [ 1 ]

Index Follow-up HIV Care and ART

IndexFilwUpHIV [ 1 ]

8 Are you currently taking HIV medications (ART)? 8 IFHacurr No -> If no, go to item 16 on page 4.

8a. Since what date have you been on HIV medications (ART) treatment? 9 IFHartdt OR 10 IFHck Since last study visit

9 Since your last study visit, with whom have you shared that you are taking ART? Mark all that apply. 11 IFHaspou 12 IFHachld 13 IFHaprnt 14 IFHaofm 15 IFHafnd 16 IFHaoth 17 IFHanone 18 IFHaref 19 IFHant

10 Since your last study visit, has your doctor changed your HIV medications (ART) drugs? 20 IFHachng No -> If no, go to item 11.

10a. Were your HIV medications (ART) drugs changed due to side effects or some other reason? 21 IFHacrsn something else

11 We know that it is very difficult to take your HIV medications all the time. When was the last time you missed taking any doses of your ART medication?

22 IFHalast Never missed taking medications in past 3 months -> End of form.

12 In the last month, on about how many days did you miss at least one tablet? 23 IFHadays

13 Did you miss at least one tablet in the last four days? 24 IFHa4day No -> If no, go to item 15 on page 4.

13a. In the last four days, on how many days did you miss at least one tablet? 25 IFHa4num

14 Did you miss at least one tablet yesterday? 26 IFHayest No

/ersionInitDate [ 1 ]

Version 2. 27. 28 VersDt 29 formlang Completed by: 30 InitDate (initials/date)

(HPTN 074) DF/Net 074

(IFH-4) 188

Visit Code: 6 visit

IndexFlwUpHIV [ 1 ]

No data recorded on this page

8 IFH4nd

Participant ID:

7 ptid

Site Number Network Number Chk Cohort

Header [ 1 ]

Index Follow-up HIV Care and ART

Page 4 of 6

15 The last time you missed at least one tablet, which of these best describes the reason why? **Mark only one.**

I forgot

I did not have the medication with me at the time I needed to take it

I did not want person(s) nearby to see me taking the medication

I was trying to avoid side effects

I felt healthy

I was drunk

I am not engaging in any behaviors that can transmit HIV to others

I do not believe the medicines are beneficial

not applicable—no missed tablets

Other, specify:

Local language: \_\_\_\_\_ English: 10 IFHarsx

16 If you were on ART since your last visit, have you stopped? By stopped we mean that you have not taken any of your medication for the last 2 weeks.

11 IFHastop No → If no, go to item 18.

17 What date did you stop taking ART?

12 IFHaspdt

dd MMM yy

Version 2 13-14 VersDt

15 formlang

Completed by: 16 InitDate (initials/date)

/ersionInitDate [ 1 ]

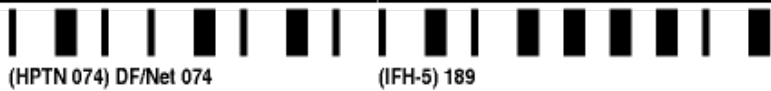

Visit Code: 6 visit  
 Index Follow-up HIV F-1  
 No data recorded on this page 8 IFH4nd

Participant ID:

7 ptid

Site Number Network Number Chk Cohort

Header [ 1 ]

**Index Follow-up HIV Care and ART**

Page 5 of 6

**18** Sometimes people have trouble taking HIV medications (ART) because of personal situations or circumstances. What are the reasons you have stopped taking ART or have not yet started to take ART?

Agree Disagree Not relevant/  
Not Applicable

18a. You don't think that you need it.

9 IFHpneed

18b. You don't have time to go to the clinic.

10 IFHptime

18c. You don't have the energy or motivation to go to the clinic.

11 IFHpenrg

18d. You missed an appointment, so it is difficult to go back.

12 IFHpappt

18e. You have been too sick to go to the clinic.

13 IFHpsick

18f. Your drug use got in the way of going to the clinic.

14 IFHpdrug

18g. You had unwanted side effects or complications.

15 IFHpsaff

18h. You don't understand when you are supposed to take each pill.

16 IFHpunds

18i. You sold or lost your medicine or your medicine was stolen.

17 IFHplost

18j. Your drinking (alcohol) got in the way of going back to the clinic.

18 IFHpalc

18k. You had to wait too long, so you left without being seen.

19 IFHpwait

**19** Sometimes people find it difficult to take HIV medications (ART) because of their family or friends. What are the reasons you have stopped taking ART or have not yet started to take ART?

Agree Disagree Not relevant/  
Not Applicable

19a. You don't have enough support from family or friends.

20 IFHfnosp

19b. You don't want others to know you have HIV (e.g., see me take medication).

21 IFHfknow

/ersionInitDate [ 1 ]

Version: 22.1 23 VersDt

24 formlang

Completed by: 25 InitDate (initials/date)

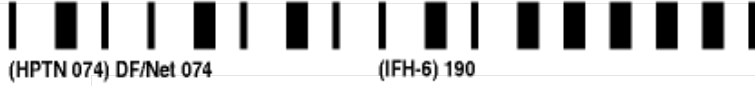

Visit Code: 6 visit  
Index Follow-up HIV 1  
No data recorded on this page 8 IFH4nd

Participant ID:

7 ptid

Site Number Network Number Chk Cohort

Header [ 1 ]

**Index Follow-up HIV Care and ART**

**Page 6 of 6**

**20** Many people find it difficult to take HIV medications (ART), even if they have previously taken ART, because of challenges in the health systems/health care process. What were the reasons you have stopped taking ART or have not yet started to take ART?  
*Agree Disagree Not relevant/ Not applicable*

20a. You do not have the necessary materials (e.g. paperwork, identification, test results) needed by the clinic.

20b. ART is too expensive.

20c. ART was not available.

20d. HIV care provider would not continue your medicine or prescription.

20e. You do not know how or where to get ART.

20f. You find transport/travel to the clinic is difficult.

20g. You have been traveling.

20h. You have been in jail or incarcerated.

20i. You are scared of being arrested for your drug use.

20j. You will need to register with the government as being a drug user.

**21** Are there any other reasons you find it difficult to continue taking ART or why you have not yet started to take ART?  
Local language: \_\_\_\_\_  
English:

Version InitDate [ 1 ]

Version:

Completed by:  (initials/date)



(HPTN 074) DF/Net 074

(FSU-1) 201

Visit Code: 6 visit

Participant ID:

7 ptid

Assessment Date: 8 Date

Site Number Network Number Chk Cohort

dd MMM Header 1 yy

Follow-up Substance Use Treatment

Page 1 of 3

1 Since your last visit, have you tried to start MAT (methadone or buprenorphine) to treat your substance use? 9 FSUstart No -> If no, go to item 2.

1a. When was your last visit?

10 FSUldt dd MMM yy

2 Are you currently taking methadone or buprenorphine? 11 FSUcrmt No -> If no, go to item 3. If yes, and this is the participant's first time in MAT during the study, complete the Substance Use Treatment Initiation CRF.

2a. How long have you currently been on MAT (methadone or buprenorphine)?

12 FSUmnts months

3 If you were on substance use treatment since your last visit, have you stopped taking MAT or buprenorphine? By stopped, we mean that you have not been taking it for at least 2 weeks. 13 FSUstop No -> If no, end of form.

3a. What date did you stop taking MMT or buprenorphine?

14 FSUstpdtd dd MMM yy

VersionInitDate 1

Version 2 15 16 VersDt

17 formlang Completed by: 18 InitDate (initials/date)

(HPTN 074) DF/Net 074

(FSU-2) 202

Visit Code: 6 visit  
uSubstanceUse f 1  
No data recorded on this page 8 FSUndr

Participant ID:

7 ptid

Site Number Network Number Chk Cohort

Header [ 1 ]

Follow-up Substance Use Treatment

Page 2 of 3

4 Sometimes people find it difficult to continue MMT or buprenorphine because of personal situations or circumstances. What are the reasons you have stopped MMT or buprenorphine?

Agree Disagree Not relevant/  
Not applicable

4a. You want to keep injecting.

9 FSUkpinj

4b. You want to handle your drug problem or stop injecting on your own.

10 FSUwnt2h

4c. You had side effects or withdrawal symptoms.

11 FSUsidef

4d. Your injecting got in the way of going to the clinic.

12 FSUinjnw

4e. Your drug use got in the way of going to the clinic.

13 FSUdrunw

4f. You have been too sick to go to the clinic.

14 FSU2sick

4g. You missed an appointment, so it is difficult to go back.

15 FSUmissa

4h. You can handle your drug problem yourself.

16 FSUcnhnd

4i. Your drinking (alcohol) got in the way of going to the clinic.

17 FSUdrink

5 Sometimes people find it difficult to continue MMT or buprenorphine because of their family or friends. What are the reasons you have stopped MMT or buprenorphine?

Agree Disagree Not relevant/  
Not applicable

5a. You don't have enough support from family or friends.

18 FSUunosup

5b. You don't want to stop seeing the friends you inject with.

19 FSUfrinj

5c. Your family objects to drug treatment.

20 FSUfamob

5d. You don't feel you have enough support from friends and family.

21 FSUflnos

/ersionInitDate [ 1 ]

Version 22 23 VersDt

24 formlang Completed by: 25 InitDate (initials/date)

(HPTN 074) DF/Net 074

(FSU-3) 203

Visit Code: 6 visit

Substance Use [ 1 ]

No data recorded on this page

8 FSUndr

Participant ID:

7 ptid

Site Number Network Number Chk Cohort

Header [ 1 ]

Follow-up Substance Use Treatment

Page 3 of 3

6 Many people find it difficult to continue MMT or buprenorphine, even if they have previously tried, because of challenges in the health systems/health care process. What were the reasons you have not continued MMT or buprenorphine?

Agree Disagree Not relevant/ Not applicable

6a. The waiting list is too long.

9 FSUwaitl

6b. You don't have the necessary materials (ID card, paperwork).

10 FSUneedm

6c. You find getting on drug treatment is too much of a hassle.

11 FSUhassl

6d. You do not know how or where to get drug treatment.

12 FSUnoknw

6e. You find transport/travel to the clinic is difficult.

13 FSUtrmsd

6f. You have been traveling.

14 FSUtravl

6g. You have been in jail or incarcerated.

15 FSUjncar

6h. You are scared of being arrested for your drug use.

16 FSUscrar

6i. You are scared of losing your job.

17 FSUscrb

6j. You were asked to leave MAT.

18 FSUleave

7 Are there any other reasons you find it difficult to continue MAT or buprenorphine?

Local language:

English: 19 FSUothx

Version InitDate [ 1 ]

Version 2 20 21 VersDt

22 formlang

Completed by: 23 InitDate (initials/date)

(HPTN 074) DF/Net 074

(SNE-1) 210

Encounter #: 6 visit

Note: Number encounters sequentially (001, 002, 003) for each participant.

Participant ID:

7 ptid

Assessment Date: 8 Date

Site Number Network Number Chk Cohort

dd /mm/yyyy Header [ 1 ]

Systems Navigator Encounter

Page 1 of 3 System Navigator [ 1 ]

1 Staff ID: 9 SNEstfid

2 Activity type: 10 SNEatype Interim

3 Contact initiated/requested by:

11 SNEcreq

Participant

Other, specify:

Local language: English: 12 SNEcreqx

4 Type of encounter:

13 SNEcntr

E-mail/Internet

Text/SMS

Other, specify:

Local language: English: 14 SNEcntrx

5 Is the participant currently taking antiretroviral therapy (ART)? 15 SNEctart No

6 Is the participant currently receiving methadone or buprenorphine? 16 SNEcrnth No

7 Does the participant have a designated support person? 17 SNEdsgns No -> If no, go to item 8 on page 2.

7a. Did the support person participate in this contact activity? 18 SNEdspar No

7b. What is the relationship of the support person to the participant?

19 SNEdrel

Friend

Other, specify:

Local language: English: 20 SNEdrelx

Version/InitDate [ 1 ]

Version 21, 22 VersDt

23 formlang Completed by: 24 InitDate (initials/date)

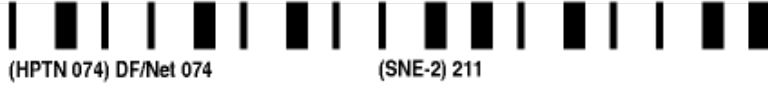

Encounter #: 6 visit  
Note: Number encounters sequentially (001, 002, 003) for each participant.

Participant ID:

7 ptid

Site Number Network Number Chk Cohort

Header [ 1 ]

Systems Navigator Encounter

Page 2 of 3

|   | 0-5 minutes                          | 6-10 minutes | 11-15 minutes |
|---|--------------------------------------|--------------|---------------|
| 8 | Total number of minutes of activity: |              |               |
|   | 16-30                                | 8 SNEmins    | utes          |

9 Primary focus of contact:

9 SNEprifc

- Legal/Judicial
- Sexual health services
- Social services
- Priests/religious leaders
- Your neighbors or community members
- Clinical/medical management
- Other, specify:

Local language: \_\_\_\_\_

English: 10 SNEprifx

10 Additional areas addressed: **Mark all that apply.**

|                                                                                                               |                                                                                                 |
|---------------------------------------------------------------------------------------------------------------|-------------------------------------------------------------------------------------------------|
| <input type="checkbox"/> 11 SNEsubut<br><small>Ref: Substance use treatment</small>                           | <input type="checkbox"/> 18 SNElegal<br><small>Ref: Legal/Judicial</small>                      |
| <input type="checkbox"/> 12 SNEhivc<br><small>Ref: HIV care</small>                                           | <input type="checkbox"/> 19 SNEsexhs<br><small>Ref: Sexual health services</small>              |
| <input type="checkbox"/> 13 SNEexpdm<br><small>Ref: Needle and syringe exchange programs</small>              | <input type="checkbox"/> 20 SNEsocsy<br><small>Ref: Social services</small>                     |
| <input type="checkbox"/> 14 SNEartim<br><small>Ref: ART initiation/Management</small>                         | <input type="checkbox"/> 21 SNErelig<br><small>Ref: Priests/religious leaders</small>           |
| <input type="checkbox"/> 15 SNEadpsp<br><small>Ref: Assistance with primary designated support person</small> | <input type="checkbox"/> 22 SNEneigh<br><small>Ref: Your neighbors or community members</small> |
| <input type="checkbox"/> 16 SNEsnetwork<br><small>Ref: Social network management</small>                      | <input type="checkbox"/> 23 SNEclinmd<br><small>Ref: Clinical/medical management</small>        |
| <input type="checkbox"/> 17 SNEacnsl<br><small>Ref: Additional counseling</small>                             | <input type="checkbox"/> 24 SNEoth<br><small>Ref: Other, specify:</small>                       |

Local language: \_\_\_\_\_

English: 25 SNEothx

Version 1. 26 27 VersDt

28 formlang

Completed by: 29 InitDate (initials/date)

(HPTN 074) DF/Net 074

(SNE-3) 212

Encounter #: 6 visit

Note: Number encounters sequentially (001, 002, 003) for each participant.

Participant ID:

7 ptid

Site Number Network Number Chk Cohort

Header [ 1 ]

Systems Navigator Encounter

Page 3 of 3

11 Assessment of client status:

SystemNavigator [ 1 ]

Client has no immediate complicating psychosocial issues

Client has complicating psychosocial issues that post minimal risk to ART or substance use adherence

Client has complicating psychosocial issues that pose moderate risk to ART or substance use adherence

Client has complicating psychosocial issues that pose severe risk to ART or substance use adherence

8 SNEcstat

12 Was a referral made at this encounter?

9 SNErefer

No If no, go to item 13.

12a. What was the referral made for? Mark all that apply.

10 SNErhiv HIV care (ART)

13 SNErpgm Needle/syringe exchange program

11 SNErisut Initial substance use treatment

14 SNErmtl Mental health counseling

12 SNErrsut Reentry into substance use treatment

13 Was a social impact reported at this encounter?

15 SNEsil

No If yes, complete Social Impact Log for each impact. If this is an interim visit, also complete a Follow-up Visit form.

14 Was a Serious Adverse Experience reported at this encounter?

16 SNEae

No If yes, complete AE Log for each reported AE. If this is an interim visit, also complete a Follow-up Visit form.

15 Did the participant report initiating any antiretroviral medications for treatment at this encounter?

17 SNEiai

No If yes, complete Index ART Initiation CRF. If this is an interim visit, also complete a Follow-up Visit form.

16 Did the participant report initiating substance use treatment (MAT) at this encounter?

18 SNEsut

No If yes, complete Substance Use Treatment Initiation CRF. If this is an interim visit, also complete a Follow-up Visit form.

VersionInitDate [ 1 ]

Version 19 20 VersDt

21 formlang

Completed by: 22 InitDate (initials/date)

(HPTN 074) DF/Net 074

(PSY-1) 225

Encounter #: 6 visit

Note: Number encounters sequentially (001, 002, 003) for each participant.

Participant ID:

7 ptid

Assessment Date: 8 Date

Site Number Network Number Chk Cohort

dd /mm/yyyy Header [ 1 ]

Psychosocial Encounter

Page 1 of 4  
PsychEncounter [ 1 ]

1 Counselor ID: 9 PSYstfid

2 Contact type:

Study site visit

10 PSYctype Telephone contact

Off-site contact, specify:

Local language:

English:

11 PSYcothx

3 Activity type:

Introductory session

First session

12 PSYatype Second session

Booster session

Index and supporter session

4 Does the participant have a designated support person?

13 PSYdsgns No → If no, go to item 5 on page 2.

4a. Did the support person participate in this contact activity?

14 PSYdspar No

4b. What is the relationship of the support person to the participant?

15 PSYdrel

Friend

Other, specify:

Local language:

English:

16 PSYdrelx

Version InitDate [ 1 ]

Version 2 17 18 VersDt

19 formlang

Completed by: 20 InitDate (initials/date)

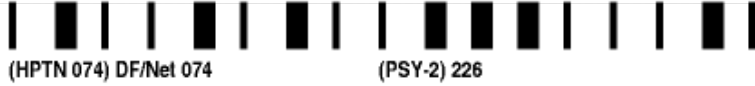

Encounter #: 6 visit  
Note: Number encounters sequentially (001, 002, 003) for each participant.

Participant ID:

7 ptid

Site Number Network Number Chk Cohort

Header [ 1 ]

Psychosocial Encounter

Page 2 of 4

5 Indicate focus of session. Mark all that apply.

'sychEncounter [ 1

- 8 PSYhinf 5a. Dealing with HIV infection
- 9 PSYfhivd 5b. HIV disclosure
- 10 PSYfrr 5c. Risk reduction
- 11 PSYfmap 5c. ART adherence and/or development of medication adherence plan
- 12 PSYfeng 5e. Engagement into care
- 13 PSYfac 5f. Adherence communication skills
- 14 PSYfsrcs 5g. Sexual risk communication skills
- 15 PSYfircs 5h. Injection risk communication skills
- 16 PSYfrrs 5i. Relationships/Social support
- 17 PSYflit 5j. HIV literacy
- 18 PSYfoth 5k. Other, specify:

Local language:

English:

19 PSYfothx

/ersionInitDate [ 1

Version 2 20 21 VersDt

22 formlang

Completed by: 23 InitDate (initials/date)



(HPTN 074) DF/Net 074

(PSY-3) 227

Encounter #:

6 visit

Note: Number encounters sequentially (001, 002, 003) for each participant.

Participant ID:

7 ptid

Site Number Network Number Chk Cohort

Header [ 1 ]

Psychosocial Encounter

Page 3 of 4

6 Barriers to ART addressed. Mark all that apply.

PsychEncounter [ 1 ]

8 PSYbart

ca. Need for ART

9 PSYbhass

cb. Hassle of taking medication

10 PSYbtime

cc. Time to go to the clinic

11 PSYbgtc

cd. Challenges getting to the clinic

12 PSYbinc

ce. Challenges/Issues in the clinic

13 PSYbmiss

cf. Previously missed appointments

14 PSYbsick

cg. Too sick

15 PSYbalc

ch. Alcohol use interference

16 PSYbdrug

ci. Drug use interference

17 PSYbfood

cj. Don't have food/water to take medicine

18 PSYbmeds

ck. Don't understand when/how to take medicine

19 PSYbse

cl. Side effects/complications

20 PSYbsupp

cm. Family or friend support

21 PSYbdisc

cn. Disclosure issues, including fear of inadvertent disclosure, strategies for intentional disclosure

22 PSYbnay

co. Navigating structural issues—referral to systems navigator

23 PSYboth

cp. Other, specify:

Local language: \_\_\_\_\_

English:

24 PSYbothx

Version/InitDate [ 1 ]

Version 2

25

26 VersDt

27 formlang

Completed by:

28

InitDate

(initials/date)

Participant ID:

7 ptid

Site Number Network Number Chk Cohort

Header [ 1 ]

Psychosocial Encounter

Page 4 of 4

7 Barriers to MMT/buprenorphine addressed. Mark all that apply.

PsychEncounter [ 1 ]

- 8 PSYmmmt *Need for MMT/buprenorphine*
- 9 PSYmhass *Hassle of taking medication*
- 10 PSYmtime *Time to go to the clinic*
- 11 PSYmgtc *Going to the clinic is a hassle*
- 12 PSYmmiss *Previously missed appointments*
- 13 PSYmsick *Too sick*
- 14 PSYmalc *Alcohol use interference*
- 15 PSYmdrug *Drug use interference*
- 16 PSYmfood *Don't have food/water to take medicine*
- 17 PSYmmeds *Don't understand when/how to take medicine*
- 18 PSYmse *Side effects/complications*
- 19 PSYmsupp *Family/friend support*
- 20 PSYmnav *Navigating structural issues—referral to systems navigator*
- 21 PSYmoth *Other, specify:*

Local language: \_\_\_\_\_

English: 22 PSYmothx

8 Total number of minutes of activity:

0-5 minutes 6-10 minutes 11-15 minutes

16-30 23 PSYmin utes

9 As a result of this counseling, were systems navigator services provided?

24 PSYsnsp No

/ersionInitDate [ 1 ]

Version 2 25 26 VersDt

27 formlang Completed by: 28 InitDate (initials/date)

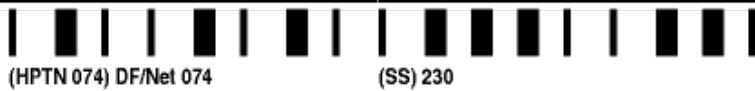

(HPTN 074) DF/Net 074

(SS) 230

Visit Code: 6 visit

Participant ID:

7 ptid

Site Number Network Number Chk Cohort

Header [ 1 ]

Specimen Storage

1 PLASMA

Specimen Collection Date:

8 SSplsdt

dd MMM yy

9 SSpls

SpecimenStorage [ 1

Not required

1a. Reason not stored or not collected:

Local language:

English: 10 SSplsr

2 FROZEN URINE

Specimen Collection Date:

11 SSfurndt

dd MMM yy

12 SSfurn

Not required

2a. Reason not stored or not collected:

Local language:

English: 13 SSfurnr

3 DRIED URINE CARTRIDGE

Specimen Collection Date:

14 SSdurndt

dd MMM yy

15 SSdurn

Not required

3a. Reason not stored or not collected:

Local language:

English: 16 SSdurnr

4 DRIED URINE FILTER PAPER

Specimen Collection Date:

17 SSufpdt

dd MMM yy

18 SSufp

Not required

4a. Reason not stored or not collected:

Local language:

English: 19 SSufpr

Comments (Local language):

Comments (English): 20 SScomm

Version/InitDate [ 1

Version 1 21 22 VersDt

23 formlang

Completed by: 24 InitDate (initials/date)

Participant ID:

7 ptid  
Site Number Network Number Chk Cohort

Date of Contact: 8 Date  
dd

Header [ 1 ]

Agency Contact

1 Contact initiated by:

Systems navigator  
Counselor  
9 ACLinit  
Agency/clinic  
Other, specify: (Local Language) (English) 10 ACLcothx

AgencyContact [ 1 ]

2 Type of facility contacted:

HIV clinic  
Substance use treatment facility  
Needle and syringe exchange program  
Mental health counselor/facility  
11 ACLfacil  
Sexual health services  
Social services  
Clinical/medical services  
Legal/judicial  
Other, specify: (Local Language) (English) 12 ACLfothx

3 Type of contact:

In person  
Telephone  
13 ACLtype  
Email/Internet  
Text message/SMS  
Other, specify: (Local Language) (English) 14 ACLtothx

VersionInitDate [ 1 ]

Version 2 15 16 VersDt

17 formlang

Completed by: 18 InitDate (initials/date)

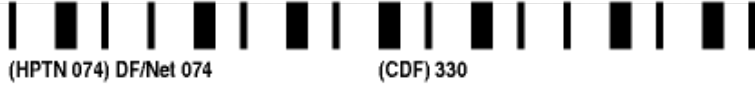

(HPTN 074) DF/Net 074

(CDF) 330

Visit Code: 6 visit

Participant ID:

7 ptid

Initial Specimen Collection Date: 8 Date

Site Number Network Number Chk Cohort

dd MMM Header [ 1 ]

CD4+ Count and Viral Load

1 CD4 + Count:  9 CDFtcln Not done/ Not collected Alternate Collection Date: CD4Count [ 1 ]

10 CDFtcltdt dd MMM yy

1a. Absolute CD4+:  11 CDFcd4n Unable to analyze

12 CDFcd4 cells/mm3

2 HIV-1 RNA PCR:  13 CDFhrpn Not done/ Not collected Alternate Collection Date:

14 CDFhrpdt dd MMM yy

2a. HIV RNA PCR (plasma):

< = > viral copies/mL 15 CDFhrp 16 CDFhrp OR 17 CDFundct

2b. RNA PCR kit code:

18 CDFrkit kit code

Comments (Local language):

Comments (English): 19 CDFcomm

Version InitDate [ 1 ]

Version: 20 21 VersDt

22 formlang Completed by: 23 InitDate (initials/date)

Participant ID: 39 subsum

7 ptid

Date Reported to Site: 8 Date

Site Number

Network Number

Chk

Cohort

dd

Header [ 1 ]

15 AEmdlitc

16 AEmdv

Adverse Experience Log

17 AEmdlth

14 AEmdsoc

11 AEmdpt

1 9 AEdiag

34 AEmquery

12 AEm

13 AEm

2 Onset date:

18 AEondt

dd

MMM

yy

QC [ 1 ]

40 AEsocg

Severity Grade:

19 AEseve

Grade 5—death

aning

41 AEsocg

Relationship to study product:

20 AErcl

Not related

If not related, record rationale or alternative etiology in Comments.

5 Study product administration:

21 AEdrad

N/A

6 Status or Outcome of AE:

Continuing

Resolved

22 AEoutc

Severity/frequency increased (Report as new AE)

Continuing at end of study participation

6a. Status/Outcome Date (Leave blank if Status/Outcome is "continuing".)

23 AEocdt

dd

MMM

yy

7 Treatment:

Mark "none" or all that apply.

24 AErno

None

25 AErtrx

Medication(s)

26 AErpr

Procedure/surgery

Comment below.

27 AErho

Not prolonged hospitalization

Comment below.

28 AErtrt

Other: specify:

Comment below.

29 AErtrt

8 Is this an SAE according to ICH guidelines?

30 AEich

No

9 Has or will this AE be reported as an EAE? (if a SUSAR)?

31 AEdaids

No

10 At which visit was this AE first reported? Visit code required (regular or interim).

32 AEvisit

visit code

Comments (Local language):

Comments (English): 33 AComm

/ersionInitDate [ 1 ]

Version 1

35 36 VersDt

37 formlang

Completed by:

38 InitDate

(initials/date)

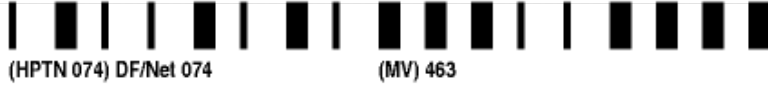

(HPTN 074) DF/Net 074

(MV) 463

Visit Code: 6 visit

Participant ID:

7 ptid

Form Completion Date: 8 Date

Site Number Network Number Chk Cohort

dd M/M/yy Header [ 1 ]

Missed Visit

MissedVisit [ 1 ]

1 Target Visit Date: 9 MVtdt

dd MMM yy

2 Reason visit was missed. Mark only one.

- 2a. Unable to contact participant
- 2b. Unable to schedule appointment(s) within window
- 2c. Participant refused visit
- 2d. Participant incarcerated
- 2e. Participant admitted to a health care facility
- 2f. Participant withdrew from the study → Complete Termination form.
- 2g. Participant deceased → Complete Termination form. Complete Adverse Event Log.
- 2h. Participant travelled outside the province for work
- 2i. Other, specify: (Local language)

10 MVreasn

(English) 11 MVotrex

Comments (Local language):

Comments (English): 12 MVcomm

VersionInitDate [ 1 ]

Version 13 14 VersDt

15 formlang

Completed by: 16 InitDate (initials/date)

Participant ID:

7 ptid  
Site Number Network Number Chk Cohort

FOR INTERNAL USE ONLY  
Participant Incident Log

Form completion date dd MMM yy 8 Date  
PIL [ 1 ] Header [ 1 ]

Study Project Manager 9 PILstaff

If applicable Plate # 10 PILplate Visit code/page # 11 PILvisit

Incident Mark all that apply.  
12 PILinelg inappropriate enrollment/ineligible  
13 PILrand randomization  
14 PILhivt HIV testing  
15 PILprot protocol deviation/event  
16 PILsubo other, specify: 17 PILsubox  
18 PILprots [protocol-specific reason]

Details: Provide additional information, including date(s), site(s), lab(s), outcome, etc. as appropriate.  
19 PILevnt

VersionInitDate [ 1 ]  
Version 20 21 VersDt



Participant ID:

7 ptid

Site Number Network Number Chk Cohort

Header [ 1 ]

**Termination**

Termination [ 1 ]

1

Termination Date:

8 TMtmdt  
dd MMM yy

Date the site determined that the participant was no longer in the study.

2

Reason for termination. Mark only one.

2a. Scheduled exit visit/end of study → **End of form.**

2b. Death (Indicate date and cause if known.)

dd MMM yy

2b1. Date of death:

10 TMdddt

OR

11 TMddun  
date unknown

2b2. Cause of death:

12 TMdcau

OR

13 TMdcun  
cause unknown

Complete or update Adverse Experience Log.

2c. Participant refused further participation, specify: 14 TMrefrx

2d. NOT APPLICABLE FOR THIS PROTOCOL

2e. Participant relocated, no follow-up planned

9 TMtrmsn

2f. Investigator decision, specify 15 TMinvdx

2g. Unable to contact participant

2h. NOT APPLICABLE FOR THIS PROTOCOL

2i. Inappropriate enrollment → **End of form.**

2j. Invalid ID due to duplicate screening/enrollment → **End of form.**

2k. Other, specify 16 TMtrmox

2l. Early study closure → **End of form.**

2m. Index Termination (Network Partners only) → **End of form.**

3

Was termination associated with an adverse experience?

yes no don't know

17 TMae

If no or don't know, end of form.

3a. Record AE Log page number:

page #

18 TMaelp

OR

Specify: (Local language) (English)

19 TMreacx

Comments (Local language):

Comments (English):

20 TMcomm

Version/InitDate [ 1 ]

Version

21 22 VersDt

23 formlang

Completed by:

24 InitDate

(initials/date)

Participant ID:

7 ptid  
Site Number Network Number Chk Cohort

Form Completion Date: 8 Date  
dd MMM yy

Header | 1/1

**Protocol Deviation Log**

ProtocolDevLog | 1

|   |                                                                                                                                                          |   |                                                       |
|---|----------------------------------------------------------------------------------------------------------------------------------------------------------|---|-------------------------------------------------------|
| 1 | Site awareness date: 9 PDLsdt<br><small>dd MMM yy</small>                                                                                                | 2 | Deviation date: 10 PDLddt<br><small>dd MMM yy</small> |
| 3 | Has or will this deviation be reported to local IRB/EC? <input type="checkbox"/> 11 PDLirb No                                                            |   |                                                       |
| 4 | Has or will this deviation be reported to DAIDS as a critical event? <input type="checkbox"/> 12 PDLdaids No                                             |   |                                                       |
| 5 | Type of deviation: <input type="checkbox"/> 13 PDLtype<br><small>(See back of form for code listing.)</small>                                            |   |                                                       |
| 6 | Description of deviation (Local language):<br><br>Description of deviation (English):<br>14 PDLpdx                                                       |   |                                                       |
| 7 | Plans and/or action taken to address the deviation (Local language):<br><br>Plans and/or action taken to address the deviation (English):<br>15 PDLdaddx |   |                                                       |
| 8 | Plans and/or action taken to prevent future occurrences of the deviation (Local language):<br><br>16 PDLfdocx                                            |   |                                                       |
| 9 | Deviation reported by (staff name): <input type="checkbox"/> 17 PDLStaff                                                                                 |   |                                                       |

Version/InitDate | 1

Version:  18  19 VersDt

20 formlang

Completed by:  21 InitDate (initials/date)
